# Supplementary material
Source: HighWire-hosted journal article supplement (https://thorax.bmj.com/content/76/2/134)
Supplement: inline-supplementary-material-2 [file inline-supplementary-material-2.pdf]

|            |            |            |            |            |            |            |            |            |            |            |            |
|------------|------------|------------|------------|------------|------------|------------|------------|------------|------------|------------|------------|
| C20orf202  | 87.9651047 | 61.4753315 | 0.69886044 | 49.4391187 | 29.5275939 | 0.59725162 | 1.77926118 | -0.8312783 | 1.7614212  | 0.00012994 | 0.03054596 |
| SUMO2      | 2902.03721 | 608.841171 | 0.20979785 | 2417.75706 | 472.287934 | 0.19534135 | 1.20030141 | -0.2633967 | 6.95465889 | 0.0001302  | 0.03054596 |
| PRSS36     | 226.193493 | 84.9510242 | 0.37556794 | 340.268602 | 155.270406 | 0.45631717 | 1.50432534 | 0.58911661 | 3.68108458 | 0.00013394 | 0.03058739 |
| ADAM8      | 334.128124 | 870.697108 | 2.60587794 | 351.053159 | 356.714714 | 1.01612734 | 1.05065433 | 0.07128809 | 3.59774151 | 0.00013411 | 0.03058739 |
| TLR9       | 25.5535521 | 27.5000601 | 1.07617368 | 37.1166574 | 22.7610222 | 0.61322931 | 1.45250481 | 0.53854295 | 0.47007775 | 0.00014659 | 0.03245545 |
| FAM107B    | 3432.39458 | 871.287274 | 0.2538424  | 2693.21938 | 667.821793 | 0.24796413 | 1.27445785 | -0.3498837 | 7.15150046 | 0.00014736 | 0.03245545 |
| AQP12B     | 6.52904232 | 5.42376072 | 0.83071306 | 14.7602513 | 14.3682789 | 0.97344405 | 2.26070695 | 1.17677399 | -0.8376206 | 0.00014967 | 0.03245545 |
| APOBEC3B-A | 41.1069409 | 85.3728012 | 2.07684638 | 60.4655    | 95.359742  | 1.57709342 | 1.47093164 | 0.5567302  | 0.97806623 | 0.00015132 | 0.03245545 |
| FOX11      | 11.1461145 | 8.08487306 | 0.72535349 | 21.6248361 | 17.8777009 | 0.82672076 | 1.94012327 | 0.95614832 | -0.2714364 | 0.00015218 | 0.03245545 |
| TNFAIP6    | 94.0291468 | 71.1272434 | 0.75643825 | 219.587428 | 557.56583  | 2.53915188 | 2.33531235 | 1.22361552 | 2.7900676  | 0.00015521 | 0.032678   |
| DYSF       | 273.657592 | 424.276163 | 1.55039062 | 450.075164 | 600.590578 | 1.33442284 | 1.64466537 | 0.71779408 | 3.86025779 | 0.00017271 | 0.03590096 |
| AMDHD2     | 507.064658 | 132.335509 | 0.2609835  | 681.458354 | 268.941335 | 0.39465557 | 1.34392792 | 0.42645577 | 4.73768082 | 0.00018832 | 0.03811233 |
| GRIP2      | 287.962504 | 153.107124 | 0.53169118 | 177.343398 | 96.282127  | 0.54291351 | 1.62375655 | -0.6993353 | 3.4951768  | 0.00018928 | 0.03811233 |
| ADAMDEC1   | 18.6852431 | 26.3611165 | 1.41079869 | 60.9467318 | 167.069495 | 2.74123796 | 3.2617575  | 1.70564953 | 0.81367588 | 0.00019138 | 0.03811233 |
| CNIH1      | 1051.77219 | 288.469128 | 0.27426959 | 829.922981 | 210.40198  | 0.25351989 | 1.26731301 | -0.3417729 | 5.46538944 | 0.00019281 | 0.03811233 |
| LAMB3      | 39.7948713 | 34.2702752 | 0.86117316 | 90.2374439 | 205.176565 | 2.27374088 | 1.9006923  | 0.92652499 | 1.52196594 | 0.00019495 | 0.03811233 |
| MIR6797    | 136.213674 | 147.39558  | 1.08209092 | 258.6882   | 257.668992 | 0.99606009 | 1.89913532 | 0.92534271 | 3.06459992 | 0.00019941 | 0.03843322 |
| FOLR3      | 1655.09042 | 3186.73208 | 1.92541268 | 4820.47904 | 7541.21139 | 1.5644112  | 2.91251703 | 1.54226649 | 7.13852024 | 0.00020127 | 0.03843322 |
| TREML4     | 7.92390702 | 10.6945894 | 1.34966114 | 17.7163029 | 23.4762922 | 1.32512367 | 2.23580398 | 1.16079371 | -0.7014185 | 0.00020783 | 0.0391851  |
| LAG3       | 61.1561562 | 69.3391168 | 1.13380436 | 116.239035 | 173.830923 | 1.49546083 | 1.9006923  | 0.92652499 | 1.91689001 | 0.00020998 | 0.0391851  |
| TAP1       | 2936.8782  | 1034.84379 | 0.35236183 | 3813.73706 | 1562.43527 | 0.40968615 | 1.29856834 | 0.37692194 | 7.22393888 | 0.0002143  | 0.03927634 |
| PKFB3      | 907.057761 | 225.069739 | 0.24813165 | 1212.13014 | 599.575728 | 0.49464633 | 1.33633181 | 0.41827827 | 5.57365172 | 0.00021525 | 0.03927634 |
| RGL1       | 108.293    | 53.060028  | 0.48996729 | 179.076576 | 181.383335 | 1.01288141 | 1.65363021 | 0.72563665 | 2.68378485 | 0.00022346 | 0.03995248 |
| FEZ2       | 1424.84252 | 343.066142 | 0.24077478 | 1193.05437 | 253.155429 | 0.21219102 | 1.19428129 | -0.2561427 | 5.94071013 | 0.00022382 | 0.03995248 |
| MMP23A     | 20.0643067 | 56.5976838 | 2.82081433 | 22.1125728 | 22.5179774 | 1.01833367 | 1.10208507 | 0.14023559 | -0.2771502 | 0.00023057 | 0.0407149  |
| SH3P21     | 55.753962  | 30.2115837 | 0.54187331 | 106.035703 | 163.141177 | 1.53854949 | 1.90185054 | 0.92740388 | 1.84729028 | 0.00023493 | 0.04097865 |
| VAPA       | 3711.84502 | 921.87269  | 0.24835969 | 3036.14605 | 724.368923 | 0.23858171 | 1.22255154 | -0.2898953 | 7.30346705 | 0.00023706 | 0.04097865 |
| PTGS2      | 129.265595 | 65.0723223 | 0.50340017 | 289.337308 | 1028.538   | 3.55480602 | 2.23831645 | 1.16241402 | 3.18517398 | 0.00024193 | 0.04138521 |
| DBN1       | 30.4004831 | 58.665515  | 1.92975601 | 39.3582334 | 29.5412104 | 0.75057257 | 1.29465816 | 0.37257122 | 0.48301954 | 0.00025078 | 0.04221217 |
| SLAIN2     | 1661.46346 | 344.61239  | 0.20741497 | 1405.75503 | 249.785776 | 0.17768798 | 1.18190113 | -0.2411094 | 6.16104831 | 0.00025409 | 0.04221217 |
| KRT13      | 17.5099741 | 57.3628503 | 3.27601    | 4.24421051 | 4.08931786 | 0.96350496 | 4.12561396 | -2.0446088 | -0.7069425 | 0.00025564 | 0.04221217 |
| PSMB9      | 1421.32287 | 574.52216  | 0.4042165  | 2019.18173 | 1363.50076 | 0.67527392 | 1.4206355  | 0.50653645 | 6.2533148  | 0.00025705 | 0.04221217 |
| HIST1H2BC  | 22.3158129 | 16.5846083 | 0.74317742 | 39.281733  | 29.5760053 | 0.75292007 | 1.76026449 | 0.81579222 | 0.48160309 | 0.00027218 | 0.04425475 |
| LAD1       | 21.5803238 | 13.6079429 | 0.63057177 | 40.6921989 | 29.5671367 | 0.72660455 | 1.88561577 | 0.91503573 | 0.54111249 | 0.00027693 | 0.04441484 |
| MPP2       | 9.56203699 | 7.38897586 | 0.77274077 | 15.3926573 | 11.0561538 | 0.71827454 | 1.6097676  | 0.68685242 | -0.7268561 | 0.00027857 | 0.04441484 |
| IFITM1     | 607.073215 | 1682.16879 | 2.77094878 | 607.218244 | 578.905807 | 0.95337354 | 1.0002389  | 0.00034462 | 4.3872623  | 0.00028259 | 0.04462213 |
| HBZ        | 21.0090788 | 93.296755  | 4.44078277 | 23.0909608 | 63.5542228 | 2.75234206 | 1.0990944  | 0.1363153  | -0.5087941 | 0.00028683 | 0.0447022  |
| HDGF11     | 29.755752  | 19.4035278 | 0.65209335 | 16.0681881 | 9.61110453 | 0.59814489 | 1.8518424  | -0.8889613 | 0.24384006 | 0.00028854 | 0.0447022  |
| CD8A       | 337.175134 | 797.78308  | 2.36607923 | 464.203607 | 752.824706 | 1.6217554  | 1.3767433  | 0.46125959 | 3.88926119 | 0.00029724 | 0.0456063  |
| HOOK3      | 1684.44893 | 472.017672 | 0.28022083 | 1358.53199 | 298.688073 | 0.21986091 | 1.23990377 | -0.3102282 | 6.15327777 | 0.00029993 | 0.0456063  |
| MIR5010    | 76.4784163 | 35.1510775 | 0.45962089 | 121.276555 | 60.9068238 | 0.50221433 | 1.58576185 | 0.66517612 | 2.17497406 | 0.00030283 | 0.0456239  |
| GPX3       | 1871.81886 | 1242.0252  | 0.66353921 | 3036.17097 | 2145.57671 | 0.7066719  | 1.62204316 | 0.69781221 | 6.78635412 | 0.00032185 | 0.04804919 |
| RPF1       | 988.206488 | 218.960962 | 0.2215741  | 804.192266 | 195.153444 | 0.24267013 | 1.22881869 | -0.2972721 | 5.38922294 | 0.00032478 | 0.04805061 |
| BRE-AS1    | 33.7316602 | 15.5340786 | 0.46051924 | 52.918232  | 48.6552936 | 0.91944292 | 1.5688001  | 0.64966154 | 0.97000764 | 0.00033737 | 0.04946666 |
| TRIQQ      | 1488.57272 | 508.691856 | 0.34173128 | 1158.12984 | 325.777665 | 0.28129632 | 1.28532456 | -0.3621327 | 5.96327465 | 0.00034383 | 0.04996725 |
