# Supplementary material
Source: HighWire-hosted journal article supplement (https://thorax.bmj.com/content/76/2/134)
Supplement: inline-supplementary-material-3 [file inline-supplementary-material-3.pdf]

|            |            |            |            |            |            |            |            |            |            |            |            |
|------------|------------|------------|------------|------------|------------|------------|------------|------------|------------|------------|------------|
| PALLD      | 248.666196 | 86.9313337 | 0.34959048 | 392.780386 | 330.100926 | 0.84042111 | 1.57954878 | 0.65951249 | 3.99045904 | 0.00019108 | 0.02235925 |
| LOC1019288 | 26.5767394 | 21.4160854 | 0.80582065 | 70.5840882 | 203.553939 | 2.88385023 | 2.65585959 | 1.40917888 | 1.27505028 | 0.00021703 | 0.02521414 |
| LOC1005056 | 55.2740168 | 23.518521  | 0.42548963 | 103.699496 | 192.947621 | 1.86064185 | 1.87609842 | 0.90773551 | 1.97925304 | 0.00022743 | 0.02623497 |
| LINC00189  | 20.5035182 | 24.178444  | 1.17923392 | 55.8854619 | 123.734351 | 2.21407048 | 2.72565232 | 1.44660155 | 0.90677629 | 0.00023097 | 0.02645566 |
| COL19A1    | 51.9537456 | 50.2380038 | 0.96697559 | 120.585191 | 196.078692 | 1.62605947 | 2.32101054 | 1.21475307 | 2.07417484 | 0.00023351 | 0.02656015 |
| PIWIL2     | 12.9063287 | 9.34941533 | 0.72440549 | 34.2708543 | 118.618057 | 3.46119347 | 2.65535268 | 1.40890349 | 0.26962323 | 0.0002481  | 0.02802272 |
| RORB-AS1   | 749.323194 | 656.076538 | 0.87555883 | 2183.83882 | 6213.86902 | 2.84538812 | 2.91441509 | 1.54320637 | 6.12146758 | 0.00025889 | 0.02904037 |
| ZNF583     | 84.6977601 | 27.5438554 | 0.3252017  | 151.88023  | 255.963712 | 1.68529974 | 1.79320244 | 0.84253837 | 2.54580188 | 0.00033389 | 0.03719665 |
| KCNQ1OT1   | 374.07237  | 297.515268 | 0.79534147 | 241.968754 | 92.3261473 | 0.38156227 | 1.54595321 | -0.6284967 | 4.02151498 | 0.00035161 | 0.03871642 |
| EEF1DP3    | 20.331933  | 15.1995494 | 0.7475703  | 55.6187887 | 197.398468 | 3.54913282 | 2.73553865 | 1.45182494 | 0.90614626 | 0.00035636 | 0.03871642 |
| FAM21EP    | 90.1114835 | 34.4445347 | 0.38224357 | 161.732211 | 298.189714 | 1.84372495 | 1.79480134 | 0.84382417 | 2.64386496 | 0.00035652 | 0.03871642 |
| ZNF639     | 542.501054 | 123.16309  | 0.2270283  | 722.307067 | 281.818958 | 0.39016503 | 1.33143901 | 0.41298635 | 4.9819571  | 0.00035706 | 0.03871642 |
| SLC39A5    | 14.6924677 | 11.191945  | 0.76174712 | 7.14949244 | 5.99863729 | 0.83902981 | 2.05503647 | -1.039164  | -0.5422852 | 0.00035943 | 0.03871642 |
| EFCAB11    | 33.7975163 | 19.0726476 | 0.56432098 | 72.3650007 | 189.391654 | 2.61717201 | 2.14113369 | 1.09837488 | 1.4019426  | 0.00036645 | 0.03921276 |
| MAGT1      | 1457.53832 | 416.042289 | 0.28544175 | 2018.67741 | 1288.77801 | 0.63842693 | 1.38499097 | 0.46987657 | 6.42452394 | 0.00037092 | 0.03929837 |
| TRIM10     | 22.0723033 | 32.9811335 | 1.49423162 | 61.8793823 | 200.573655 | 3.24136485 | 2.8034855  | 1.48722161 | 1.05400104 | 0.00037208 | 0.03929837 |
| MIR4537    | 21.5532105 | 26.2374447 | 1.21733348 | 68.5662403 | 222.110408 | 3.23935522 | 3.18125415 | 1.66959563 | 1.12452478 | 0.00037736 | 0.03959887 |
| WNT2B      | 11.9877434 | 8.63520395 | 0.72033607 | 30.6504383 | 99.4822656 | 3.2457045  | 2.55681467 | 1.35434759 | 0.15311526 | 0.00038077 | 0.03970011 |
| TMEM178B   | 27.2374272 | 25.7747185 | 0.94629784 | 13.9006151 | 8.75460589 | 0.62979989 | 1.95944043 | -0.9704417 | 0.18618915 | 0.00039874 | 0.04112094 |
| KRT23      | 22.1763727 | 18.1669469 | 0.81920281 | 56.8110075 | 158.455388 | 2.78916702 | 2.56178087 | 1.35714708 | 0.99598334 | 0.00040296 | 0.04112094 |
| RNVU1-18   | 738.148162 | 797.441485 | 1.08032713 | 2772.44001 | 8652.81514 | 3.12101078 | 3.75593972 | 1.90917391 | 6.3664347  | 0.00041714 | 0.04112094 |
| RNU1-27P   | 738.148162 | 797.441485 | 1.08032713 | 2772.44001 | 8652.81514 | 3.12101078 | 3.75593972 | 1.90917391 | 6.3664347  | 0.00041714 | 0.04112094 |
| RNU1-1     | 738.148162 | 797.441485 | 1.08032713 | 2772.44001 | 8652.81514 | 3.12101078 | 3.75593972 | 1.90917391 | 6.3664347  | 0.00041714 | 0.04112094 |
| RNU1-28P   | 738.148162 | 797.441485 | 1.08032713 | 2772.44001 | 8652.81514 | 3.12101078 | 3.75593972 | 1.90917391 | 6.3664347  | 0.00041714 | 0.04112094 |
| RNU1-3     | 738.148162 | 797.441485 | 1.08032713 | 2772.44001 | 8652.81514 | 3.12101078 | 3.75593972 | 1.90917391 | 6.3664347  | 0.00041714 | 0.04112094 |
| RNU1-2     | 738.148162 | 797.441485 | 1.08032713 | 2772.44001 | 8652.81514 | 3.12101078 | 3.75593972 | 1.90917391 | 6.3664347  | 0.00041714 | 0.04112094 |
| RNU1-4     | 738.148162 | 797.441485 | 1.08032713 | 2772.44001 | 8652.81514 | 3.12101078 | 3.75593972 | 1.90917391 | 6.3664347  | 0.00041715 | 0.04112094 |
| SRD5A3     | 203.936012 | 93.8672378 | 0.46027789 | 298.145132 | 114.4345   | 0.38382146 | 1.46195432 | 0.54789823 | 3.64729325 | 0.00044621 | 0.04372051 |
| MAGIX      | 30.0035617 | 17.276995  | 0.57583147 | 81.4085393 | 317.869324 | 3.90461893 | 2.71329585 | 1.44004636 | 1.45612118 | 0.00045413 | 0.04423053 |
| LAMA1      | 23.384643  | 84.3640152 | 3.60766744 | 9.55484021 | 4.87786714 | 0.51051269 | 2.4474133  | -1.2912578 | -0.0163213 | 0.00047954 | 0.04620624 |
| VGLL3      | 27.7358522 | 137.27693  | 4.94943978 | 7.72068593 | 14.3577631 | 1.85964864 | 3.59240778 | -1.8449511 | 0.11412192 | 0.0004801  | 0.04620624 |
| LOC1019293 | 13.5088305 | 10.9935644 | 0.81380578 | 41.934478  | 164.700852 | 3.92757607 | 3.10422711 | 1.63423411 | 0.48459285 | 0.00049382 | 0.04724719 |
| MORN2      | 26.6272111 | 16.352776  | 0.61413777 | 63.7558031 | 195.223341 | 3.06204819 | 2.39438531 | 1.25965533 | 1.18289179 | 0.00050856 | 0.04797834 |
| SNORA27    | 16.6026312 | 12.7455637 | 0.76768336 | 43.7419448 | 131.16008  | 2.99849676 | 2.63463932 | 1.39760547 | 0.60401647 | 0.00051034 | 0.04797834 |
| C20orf195  | 13.6427612 | 12.4959074 | 0.91593683 | 38.9665791 | 153.095249 | 3.92888604 | 2.85620914 | 1.51410162 | 0.42900987 | 0.00051229 | 0.04797834 |
| SENPA8     | 20.0277043 | 11.1197841 | 0.5552201  | 50.8527565 | 166.731697 | 3.27871502 | 2.53912059 | 1.34432892 | 0.83108542 | 0.00051326 | 0.04797834 |
| DIAPH3     | 12.9418249 | 11.4607334 | 0.88555776 | 34.1309169 | 118.358341 | 3.46777502 | 2.6372569  | 1.39903811 | 0.28816324 | 0.00051623 | 0.04798006 |
| LILRB4     | 1753.79785 | 536.63506  | 0.30598456 | 3185.32027 | 6822.73705 | 2.14193126 | 1.8162414  | 0.86095597 | 6.91353841 | 0.00052362 | 0.04830506 |
| RPS15AP10  | 48.6598853 | 29.2235601 | 0.6005678  | 30.98658   | 11.766646  | 0.37973361 | 1.57035353 | -0.6510894 | 1.12805956 | 0.00052664 | 0.04830506 |
| LOC641367  | 24.3534163 | 11.5554803 | 0.47449114 | 53.2880497 | 164.521853 | 3.08740616 | 2.18811395 | 1.12968787 | 0.9622641  | 0.00052864 | 0.04830506 |
| NCAPG2     | 247.004236 | 99.5996641 | 0.40323059 | 411.24234  | 518.496316 | 1.2608048  | 1.66492019 | 0.73545302 | 4.01947251 | 0.00053171 | 0.04831388 |
| MACROD2    | 36.0466382 | 34.9356694 | 0.96917969 | 83.2714847 | 106.536674 | 1.27938963 | 2.31010405 | 1.20795783 | 1.57350269 | 0.00054354 | 0.04911456 |
| TMEM163    | 21.6675721 | 17.1647307 | 0.79218524 | 58.5595422 | 213.568406 | 3.64702998 | 2.70263516 | 1.43436677 | 0.99154813 | 0.00054755 | 0.04920363 |
