# Supplementary material
Source: HighWire-hosted journal article supplement (https://thorax.bmj.com/content/76/2/134)
Supplement: inline-supplementary-material-5 [file inline-supplementary-material-5.pdf]

**Supplementary Table 3: List of enriched pathways for 113 differentially expressed genes in BAL for genotype effects**

| Function                                             | FDR         | Genes in network | Genes in genome |
|------------------------------------------------------|-------------|------------------|-----------------|
| inflammatory response                                | 6.13E-14    | 20               | 684             |
| cell chemotaxis                                      | 2.28E-11    | 12               | 293             |
| leukocyte chemotaxis                                 | 6.36E-10    | 11               | 215             |
| positive regulation of response to external stimulus | 6.12E-09    | 10               | 296             |
| negative regulation of viral process                 | 2.09E-08    | 8                | 90              |
| positive regulation of inflammatory response         | 3.26E-08    | 7                | 135             |
| regulation of viral genome replication               | 5.18E-08    | 7                | 89              |
| negative regulation of multi-organism process        | 1.09E-07    | 8                | 169             |
| negative regulation of viral genome replication      | 1.09E-07    | 6                | 53              |
| regulation of inflammatory response                  | 1.09E-07    | 10               | 321             |
| leukocyte migration                                  | 2.37E-07    | 12               | 476             |
| viral genome replication                             | 2.63E-07    | 7                | 116             |
| regulation of viral process                          | 7.90E-07    | 9                | 174             |
| chemokine receptor binding                           | 9.31E-07    | 6                | 66              |
| regulation of symbiosis, encompassing mutualism thrc | 1.32E-06    | 9                | 202             |
| myeloid leukocyte migration                          | 1.82E-06    | 9                | 200             |
| chemokine activity                                   | 3.88E-06    | 6                | 49              |
| cytokine receptor binding                            | 1.94E-05    | 8                | 282             |
| granulocyte migration                                | 2.07E-05    | 9                | 136             |
| MHC protein binding                                  | 7.31E-05    | 4                | 35              |
| lymphocyte chemotaxis                                | 0.00013979  | 5                | 62              |
| granulocyte chemotaxis                               | 0.000252009 | 8                | 120             |
| MHC class I protein binding                          | 0.000529168 | 3                | 16              |
| chemokine-mediated signaling pathway                 | 0.000658133 | 8                | 87              |
| neutrophil chemotaxis                                | 0.000921607 | 8                | 103             |
| neutrophil migration                                 | 0.000921607 | 9                | 115             |
| cellular response to tumor necrosis factor           | 0.00175818  | 10               | 239             |
| response to tumor necrosis factor                    | 0.003894631 | 11               | 259             |
| eosinophil migration                                 | 0.006964945 | 4                | 26              |
| CCR chemokine receptor binding                       | 0.010603936 | 4                | 43              |
