# Supplementary material
Source: HighWire-hosted journal article supplement (https://thorax.bmj.com/content/76/2/134)
Supplement: inline-supplementary-material-6 [file inline-supplementary-material-6.pdf]

Supplementary Table 4: List of differentially expressed MiRNAs in BAL for genotype effects and their target genes

| database   | mature_mirna_acc | mature_mirna_id | target_symbol | target_entrez | target_ensembl  | experiment | support_type          | pubmed_id | type      |
|------------|------------------|-----------------|---------------|---------------|-----------------|------------|-----------------------|-----------|-----------|
| mirtarbase | MIMAT0021044     | hsa-miR-5010-3p | RNF11         | 26994         | ENSG00000123091 | PAR-CLIP   | Functional MTI (Weak) | 20371350  | validated |
| mirtarbase | MIMAT0021044     | hsa-miR-5010-3p | RNF11         | 26994         | ENSG00000123091 | PAR-CLIP   | Functional MTI (Weak) | 21572407  | validated |
| mirtarbase | MIMAT0021044     | hsa-miR-5010-3p | RNF11         | 26994         | ENSG00000123091 | PAR-CLIP   | Functional MTI (Weak) | 23446348  | validated |
| mirtarbase | MIMAT0027514     | hsa-miR-6807-5p | SUMO2         | 6613          | ENSG00000188612 | HITS-CLIP  | Functional MTI (Weak) | 23313552  | validated |
| mirtarbase | MIMAT0027495     | hsa-miR-6797-3p | CYCS          | 54205         | ENSG00000172115 | PAR-CLIP   | Functional MTI (Weak) | 23446348  | validated |
| mirtarbase | MIMAT0027495     | hsa-miR-6797-3p | MCMD2         | 157777        | ENSG00000178460 | HITS-CLIP  | Functional MTI (Weak) | 23824327  | validated |
