# Supplementary material
Source: HighWire-hosted journal article supplement (https://thorax.bmj.com/content/76/2/134)
Supplement: inline-supplementary-material-7 [file inline-supplementary-material-7.pdf]

Supplementary Table 5: List of differentially expressed MiRNAs in PBMC for genotype effects and their target genes

| database   | mature_mirna_acc | mature_mirna_id  | target_symbol | target_entrez | target_ensembl  | experiment               | support_type          | pubmed_id | type      |
|------------|------------------|------------------|---------------|---------------|-----------------|--------------------------|-----------------------|-----------|-----------|
| mirtarbase | MIMAT0000255     | hsa-miR-34a-5p   | CDC25C        | 995           | ENSG00000158402 | Microarray               | Functional MTI (Weak) | 19461653  | validated |
| mirtarbase | MIMAT0000063     | hsa-let-7b-5p    | NCAPG2        | 54892         | ENSG00000146918 | pSILAC//Proteomics;Other | Functional MTI (Weak) | 18668040  | validated |
| mirtarbase | MIMAT0000063     | hsa-let-7b-5p    | KIAA1549      | 57670         | ENSG00000122778 | CLASH                    | Functional MTI (Weak) | 23622248  | validated |
| mirtarbase | MIMAT0000441     | hsa-miR-9-5p     | BIK           | 638           | ENSG00000100290 | Microarray               | Functional MTI (Weak) | 17612493  | validated |
| mirtarbase | MIMAT0000442     | hsa-miR-9-3p     | FBXL13        | 222235        | ENSG00000161040 | PAR-CLIP                 | Functional MTI (Weak) | 22012620  | validated |
| mirtarbase | MIMAT0000442     | hsa-miR-9-3p     | FBXL13        | 222235        | ENSG00000161040 | PAR-CLIP                 | Functional MTI (Weak) | 23446348  | validated |
| mirtarbase | MIMAT0004589     | hsa-miR-30b-3p   | RAD51B        | 5890          | ENSG00000182185 | PAR-CLIP                 | Functional MTI (Weak) | 22100165  | validated |
| mirtarbase | MIMAT0004550     | hsa-miR-30c-2-3p | NRG4          | 145957        | ENSG00000169752 | PAR-CLIP                 | Functional MTI (Weak) | 23592263  | validated |
| mirtarbase | MIMAT0004674     | hsa-miR-30c-1-3p | NRG4          | 145957        | ENSG00000169752 | PAR-CLIP                 | Functional MTI (Weak) | 23592263  | validated |
| mirtarbase | MIMAT0021128     | hsa-miR-5196-5p  | NR4A3         | 8013          | ENSG00000119508 | HITS-CLIP                | Functional MTI (Weak) | 23313552  | validated |
| mirtarbase | MIMAT0019080     | hsa-miR-4537     | NLRP9         | 338321        | ENSG00000185792 | PAR-CLIP                 | Functional MTI (Weak) | 23592263  | validated |
| mirtarbase | MIMAT0021129     | hsa-miR-5196-3p  | SPA17         | 53340         | ENSG00000064199 | HITS-CLIP                | Functional MTI (Weak) | 19536157  | validated |
| mirtarbase | MIMAT0032110     | hsa-miR-3653-5p  | SENK8         | 123228        | ENSG00000166192 | HITS-CLIP                | Functional MTI (Weak) | 23824327  | validated |
| mirtarbase | MIMAT0032110     | hsa-miR-3653-5p  | WNT2B         | 7482          | ENSG00000134245 | HITS-CLIP                | Functional MTI (Weak) | 23824327  | validated |
| mirtarbase | MIMAT0030417     | hsa-miR-6516-5p  | NLRP9         | 338321        | ENSG00000185792 | PAR-CLIP                 | Functional MTI (Weak) | 23592263  | validated |
| tarbase    | MIMAT0000063     | hsa-let-7b-5p    | NCAPG2        | 54892         | ENSG00000146918 | Proteomics               | positive              | NA        | validated |
| tarbase    | MIMAT0000441     | hsa-miR-9-5p     | BIK           | 638           | ENSG00000100290 | Microarray               | positive              | NA        | validated |
