# Supplementary material
Source: HighWire-hosted journal article supplement (https://thorax.bmj.com/content/76/2/134)
Supplement: inline-supplementary-material-8 [file inline-supplementary-material-8.pdf]

|          |            |            |            |            |            |            |            |            |           |           |
|----------|------------|------------|------------|------------|------------|------------|------------|------------|-----------|-----------|
| IGFBP4   | 0.58916731 | 0.52270409 | 0.88719127 | 1.74125037 | 3.90409283 | 2.24212032 | 2.95544294 | 1.5633744  | 0.0052719 | 0.0447956 |
| PRR15    | 3.24502793 | 1.42399756 | 0.43882444 | 5.24985768 | 11.8282454 | 2.25306019 | 1.61781587 | 0.6940474  | 0.0052719 | 0.0447956 |
| GBP7     | 1.13981335 | 0.93558681 | 0.82082458 | 1.2824538  | 1.6916399  | 1.31906498 | 1.12514369 | 0.1701093  | 0.0052719 | 0.0447956 |
| MIR570   | 4.48417241 | 15.263928  | 3.40395654 | 1.87925    | 4.85555493 | 2.58377275 | 2.38615001 | -1.2546847 | 0.0052719 | 0.0447956 |
| PLEKHB1  | 4.41859483 | 1.54275054 | 0.34914958 | 5.27363636 | 5.63399492 | 1.06833208 | 1.19350983 | 0.2552104  | 0.0056121 | 0.0470199 |
| BTG2     | 50.2756345 | 20.8090633 | 0.41389957 | 57.8049    | 45.1433467 | 0.78096055 | 1.14975973 | 0.2013324  | 0.0056121 | 0.0470199 |
| ANKRD54  | 4.19432724 | 1.27576636 | 0.30416472 | 4.46979705 | 4.40239995 | 0.98492167 | 1.06567676 | 0.0917699  | 0.0056121 | 0.0470199 |
| MIR635   | 4.05990897 | 7.94310358 | 1.95647332 | 3.90599546 | 10.4459252 | 2.67433111 | 1.03940443 | -0.0557571 | 0.0056121 | 0.0470199 |
| SNORA19  | 7.40881621 | 28.5852312 | 3.85827242 | 0.68058182 | 3.19221169 | 4.69041576 | 10.8860037 | -3.4444025 | 0.0056121 | 0.0470199 |
| ERICH2   | 0.14151732 | 0.33211888 | 2.34684253 | 1.38393336 | 4.385489   | 3.16885852 | 9.77925044 | 3.2897239  | 0.0059716 | 0.0492869 |
| LAPTM4B  | 0.35891642 | 0.2681929  | 0.74722938 | 1.00605521 | 2.64398491 | 2.62807139 | 2.80303475 | 1.4869896  | 0.0059716 | 0.0492869 |
| ISG20    | 6.96264941 | 7.28836632 | 1.0467806  | 18.3836612 | 45.5203676 | 2.47613177 | 2.64032556 | 1.4007158  | 0.0059716 | 0.0492869 |
| SPAG16   | 1.13429697 | 0.55342414 | 0.48790058 | 2.86900759 | 6.84967261 | 2.38747106 | 2.52932669 | 1.3387534  | 0.0059716 | 0.0492869 |
| MORN1    | 0.46541989 | 0.28160922 | 0.60506485 | 1.13021202 | 3.18100415 | 2.81451984 | 2.42837068 | 1.2799887  | 0.0059716 | 0.0492869 |
| IQCG     | 4.23476176 | 1.56314349 | 0.36912194 | 7.19601682 | 12.2215937 | 1.69838315 | 1.69927312 | 0.7649178  | 0.0059716 | 0.0492869 |
| RDH10    | 5.32290172 | 1.74615613 | 0.32804591 | 7.63175909 | 12.3180895 | 1.61405639 | 1.43375916 | 0.5198027  | 0.0059716 | 0.0492869 |
| NET1     | 6.79493828 | 2.59415658 | 0.3817778  | 8.261285   | 8.84243916 | 1.0703467  | 1.21579986 | 0.2819058  | 0.0059716 | 0.0492869 |
| JAG1     | 1.99624676 | 0.77891352 | 0.390189   | 2.28402817 | 2.68949826 | 1.17752412 | 1.14416124 | 0.1942904  | 0.0059716 | 0.0492869 |
| SYNPO    | 1.93590307 | 1.91622484 | 0.98983512 | 2.11953873 | 2.95409441 | 1.39374401 | 1.09485788 | 0.1307436  | 0.0059716 | 0.0492869 |
| SNORD83A | 43.7411631 | 187.349877 | 4.28314803 | 24.8576364 | 89.5975753 | 3.60442859 | 1.75966703 | -0.8153025 | 0.0059716 | 0.0492869 |
