# Supplementary material
Source: HighWire-hosted journal article supplement (https://thorax.bmj.com/content/76/2/134)
Supplement: inline-supplementary-material-9 [file inline-supplementary-material-9.pdf]

Supplementary Table 7: List of 64 differentially expressed genes in PBMC for therapy effects test by Wilcoxon rank sum test with average FPKM >1

|            | PiZZ.off.avg | PiZZ.off.sd | PiZZ.off.cv | PiZZ.on.avg | PiZZ.on.sd | PiZZ.on.cv | FC         | logFC      | PValue     | FDR        |
|------------|--------------|-------------|-------------|-------------|------------|------------|------------|------------|------------|------------|
| SPA17      | 2.04134669   | 5.20788491  | 2.5512006   | 0.88032173  | 0.63544833 | 0.72183647 | 2.31886437 | -1.2134184 | 1.15E-06   | 0.00241992 |
| APOA1-AS   | 1.5799337    | 6.80134589  | 4.30482994  | 0.15120012  | 0.21501696 | 1.42206871 | 10.4492885 | -3.3853328 | 1.31E-06   | 0.00241992 |
| SNORD95    | 501.992459   | 2353.80056  | 4.68891617  | 40.1735046  | 71.2955529 | 1.7746909  | 12.4956103 | -3.6433495 | 1.02E-06   | 0.00241992 |
| SNORA33    | 90.4070276   | 439.833163  | 4.86503289  | 6.02435546  | 9.30248559 | 1.5441462  | 15.0069212 | -3.9075561 | 8.96E-07   | 0.00241992 |
| SNORD92    | 248.214514   | 1120.36167  | 4.51368315  | 11.8432864  | 36.1376656 | 3.05132076 | 20.9582464 | -4.3894461 | 1.31E-06   | 0.00241992 |
| SNORD12    | 106.355069   | 515.606485  | 4.84797283  | 5.07442273  | 15.0313861 | 2.96218641 | 20.9590479 | -4.3895013 | 6.94E-07   | 0.00241992 |
| SCARNA27   | 64.869891    | 304.096702  | 4.68779425  | 1.91526046  | 3.1479117  | 1.64359458 | 33.8700102 | -5.0819365 | 5.34E-07   | 0.00241992 |
| MIR192     | 34.0200441   | 163.968154  | 4.81975136  | 0.375645    | 1.76193123 | 4.69041576 | 90.564347  | -6.5008713 | 1.31E-06   | 0.00241992 |
| SNORD100   | 1240.00579   | 6066.38815  | 4.89222568  | 12.4839182  | 26.2844703 | 2.1054664  | 99.3282532 | -6.6341322 | 2.38E-07   | 0.00241992 |
| SNORD73A   | 438.018242   | 2207.16473  | 5.038979    | 0.00061464  | 0.00288241 | 4.68959871 | 712643.601 | -19.442821 | 8.96E-07   | 0.00241992 |
| SNORD45B   | 232.798052   | 1015.61427  | 4.36264075  | 22.7447364  | 37.0168696 | 1.6274917  | 10.2352495 | -3.3554744 | 1.48E-06   | 0.00246644 |
| SNORD116-1 | 46.8468      | 237.835362  | 5.07687531  | 3.15515455  | 7.3051797  | 2.31531597 | 14.8477038 | -3.8921679 | 1.89E-06   | 0.00246644 |
| SNORD28    | 277.088655   | 1425.05528  | 5.14295786  | 9.57644546  | 24.0993246 | 2.51652084 | 28.934395  | -4.8547136 | 1.67E-06   | 0.00246644 |
| SNORD57    | 2671.09967   | 13407.5252  | 5.0194777   | 74.2533636  | 168.027358 | 2.2628922  | 35.9727767 | -5.1688336 | 1.89E-06   | 0.00246644 |
| SNORD116-1 | 197.641997   | 1043.96543  | 5.28210322  | 2.83022727  | 6.42277281 | 2.26934878 | 69.8325532 | -6.1258278 | 1.89E-06   | 0.00246644 |
| SNORD82    | 182.776635   | 947.533266  | 5.18410501  | 2.54088636  | 8.24215086 | 3.24380932 | 71.9342026 | -6.168606  | 2.13E-06   | 0.00248935 |
| MIR342     | 37.2594155   | 154.209239  | 4.13879921  | 2.70427727  | 6.38699258 | 2.36181129 | 13.7779568 | -3.7842901 | 2.70E-06   | 0.00249995 |
| SYNE1-AS1  | 1.24274093   | 6.49073126  | 5.22291582  | 0.04385829  | 0.07731442 | 1.76282325 | 28.3353706 | -4.8245322 | 2.40E-06   | 0.00249995 |
| SNORD18A   | 361.751597   | 1907.70906  | 5.27353321  | 7.02165     | 18.7955412 | 2.67679836 | 51.5194572 | -5.6870455 | 3.04E-06   | 0.00249995 |
| MIR150     | 129.965021   | 681.468563  | 5.24347674  | 2.43060455  | 6.33018559 | 2.60436672 | 53.4702451 | -5.7406644 | 3.04E-06   | 0.00249995 |
| SNORD13    | 292.849819   | 1567.35134  | 5.35206526  | 4.20811455  | 9.52677256 | 2.26390524 | 69.5916937 | -6.1208432 | 2.70E-06   | 0.00249995 |
| SNORD42B   | 714.022566   | 3772.59341  | 5.28357729  | 12.4542818  | 43.4951715 | 3.49238697 | 57.3314926 | -5.8412559 | 3.41E-06   | 0.00245588 |
| SNORA43    | 71.0059556   | 380.636379  | 5.36062611  | 1.08538486  | 2.94799032 | 2.71607836 | 65.4200722 | -6.0316614 | 3.41E-06   | 0.00261558 |
| SNORD50B   | 132.502635   | 558.846975  | 4.21762916  | 11.7717955  | 20.9900507 | 1.7830798  | 11.255941  | -3.4926148 | 4.82E-06   | 0.00314864 |
| RNU4-1     | 71.4428772   | 274.245839  | 3.83867292  | 4.51057182  | 8.20074146 | 1.81811571 | 15.8389845 | -3.9854079 | 4.82E-06   | 0.00314864 |
| SNORD102   | 249.98129    | 1339.65136  | 5.35900065  | 11.5261     | 20.6945079 | 1.79544754 | 21.6882805 | -4.4388438 | 4.82E-06   | 0.00314864 |
| SNORD50A   | 273.628614   | 1412.34849  | 5.16155262  | 23.2385364  | 34.25963   | 1.47425937 | 11.7747783 | -3.557628  | 5.39E-06   | 0.00342481 |
| SNORD19    | 5.4743931    | 14.9404725  | 2.72915594  | 0           | 0          | #DIV/0!    | Inf        | #NAME?     | 6.03E-06   | 0.00352894 |
| SCARNA16   | 35.7307973   | 127.780622  | 3.57620406  | 7.43578864  | 6.82696032 | 0.91812189 | 4.8052465  | -2.2646104 | 6.03E-06   | 0.00352894 |
| SNORD119   | 57.7981862   | 291.887329  | 5.05011226  | 8.52621364  | 25.1948278 | 2.95498434 | 6.77888083 | -2.7610471 | 7.53E-06   | 0.00418498 |
| MIRLET7B   | 777.944693   | 3068.3544   | 3.94418065  | 212.194741  | 225.909159 | 1.06463128 | 3.66618272 | -1.8742787 | 8.40E-06   | 0.00424533 |
| SNORD6     | 1132.0653    | 5873.85562  | 5.1886191   | 47.5965364  | 195.253362 | 4.1022599  | 23.7846151 | -4.5719568 | 8.40E-06   | 0.00424533 |
| MIRLET7G   | 55.698231    | 281.375586  | 5.05178675  | 5.60914091  | 12.5668615 | 2.24042535 | 9.92990405 | -3.3117798 | 9.37E-06   | 0.00443113 |
| SNORD56    | 217.534717   | 1158.39669  | 5.3251118   | 9.26868182  | 43.4739713 | 4.69041576 | 23.4698657 | -4.5527377 | 9.37E-06   | 0.00443113 |
| MORN2      | 3.37994993   | 8.37566147  | 2.47804306  | 1.64333396  | 0.92266612 | 0.5614599  | 2.05676389 | -1.0403762 | 1.29E-05   | 0.0057445  |
| DDX11L9    | 1.29783572   | 3.59381124  | 2.76908023  | 0.53329532  | 0.57850341 | 1.08477122 | 2.43361545 | -1.2831012 | 1.59E-05   | 0.00668777 |
| SNORD125   | 607.020193   | 2220.6286   | 3.65824502  | 140.812992  | 189.527894 | 1.3459546  | 4.31082519 | -2.1079641 | 1.59E-05   | 0.00668777 |
| SNORD14C   | 32.8572966   | 104.678479  | 3.18585185  | 6.60434546  | 11.0396355 | 1.67157148 | 4.97510265 | -2.3147263 | 1.96E-05   | 0.00751807 |
| SNORD36C   | 197.280745   | 1048.45023  | 5.31450868  | 12.8375636  | 26.8269025 | 2.08971914 | 15.3674599 | -3.9418068 | 1.96E-05   | 0.00751807 |
| MIR197     | 18.5433621   | 78.7911937  | 4.24902417  | 3.82829546  | 13.2426155 | 3.45914144 | 4.84376462 | -2.2761288 | 3.25E-05   | 0.01111225 |
| MIR375     | 67.73        | 364.737212  | 5.38516481  | 8.80124546  | 23.3070965 | 2.6481589  | 7.69550177 | -2.9440154 | 3.25E-05   | 0.01111225 |
| SNORD44    | 441.858983   | 2269.91478  | 5.13719279  | 177.322609  | 751.021025 | 4.2353371  | 2.49183669 | -1.3172095 | 3.96E-05   | 0.0127444  |
| SNORD52    | 32.253769    | 146.91019   | 4.55482242  | 6.38736364  | 29.9593911 | 4.69041576 | 5.04962153 | -2.3361753 | 3.96E-05   | 0.0127444  |
| SNORD34    | 533.2687     | 2265.38089  | 4.24810398  | 70.2532546  | 87.3856355 | 1.24386601 | 7.59066186 | -2.9242257 | 3.96E-05   | 0.0127444  |
| MIR409     | 24.3007828   | 117.230334  | 4.82413819  | 1.73221818  | 8.12482346 | 4.69041576 | 14.0287078 | -3.8103102 | 4.36E-05   | 0.01365105 |
| MIR6513    | 120.007535   | 630.829675  | 5.25658391  | 19.6253227  | 72.6914005 | 3.7039595  | 6.11493305 | -2.6123367 | 4.80E-05   | 0.01442586 |
| SNORD42A   | 9846.17783   | 49221.3215  | 4.99902828  | 1410.1818   | 3991.07029 | 2.83018139 | 6.98220459 | -2.8036826 | 5.28E-05   | 0.01525906 |
| RNU6-15P   | 2.4461469    | 7.74070436  | 3.16444788  | 0.41491227  | 1.94611106 | 4.69041576 | 5.89557614 | -2.5596328 | 5.81E-05   | 0.01635821 |
| SNORD41    | 1326.06126   | 6848.22735  | 5.16433708  | 602.732836  | 2567.3368  | 4.25949383 | 2.20008133 | -1.1375569 | 6.39E-05   | 0.01753573 |
| CASS4      | 4.28353103   | 3.29100095  | 0.76829161  | 2.8311325   | 1.28086294 | 0.4524207  | 1.51300974 | -0.5974213 | 8.45E-05   | 0.02236172 |
| MIR1281    | 504.494593   | 2319.52762  | 4.59772543  | 108.394959  | 278.230506 | 2.56682145 | 4.6542256  | -2.2185411 | 8.45E-05   | 0.02236172 |
| SNORD12C   | 257.384438   | 1268.09679  | 4.92685884  | 231.520773  | 1065.25966 | 4.60114073 | 1.11171207 | -0.1527832 | 9.26E-05   | 0.02422397 |
| SNORD99    | 9695.01872   | 46100.6076  | 4.75508186  | 4724.54677  | 18766.5415 | 3.97213583 | 2.05205265 | -1.0370677 | 0.00012151 | 0.02904823 |
| SNORD48    | 1502.26963   | 6917.96159  | 4.60500663  | 333.881264  | 1495.16003 | 4.478119   | 4.49941279 | -2.1697367 | 0.00012151 | 0.02904823 |
| TEC        | 1.11059505   | 1.99904381  | 1.79997544  | 0.65280374  | 0.3608817  | 0.55281806 | 1.70126943 | -0.7666116 | 0.00013285 | 0.030767   |
| RNU6-31P   | 7.62602621   | 39.4664247  | 5.17522804  | 1.59537227  | 3.46885846 | 2.1743254  | 4.78009198 | -2.2570384 | 0.00013285 | 0.030767   |
| RNY4       | 3036.72154   | 10701.1415  | 3.52391268  | 277.230777  | 294.737197 | 1.06314746 | 10.9537677 | -3.4533553 | 0.00014516 | 0.03259864 |
| RMRP       | 35.8310545   | 86.5563425  | 2.41567946  | 12.6534531  | 14.2810884 | 1.1286317  | 2.83172144 | -1.5016794 | 0.0001585  | 0.03524031 |
| MIR3184    | 116.903353   | 474.628379  | 4.06000655  | 67.9357527  | 256.34553  | 3.77335232 | 1.72079278 | -0.7830734 | 0.00018864 | 0.03994383 |
| SNORD32A   | 3975.81158   | 17305.058   | 4.35258505  | 847.073455  | 2665.35885 | 3.14654985 | 4.69358538 | -2.2306904 | 0.00018864 | 0.03994383 |
| SNORD1C    | 266.379903   | 1353.71647  | 5.08190166  | 215.819114  | 927.22079  | 4.29628671 | 1.23427392 | -0.3036626 | 0.00020561 | 0.04155707 |
| SNORD12B   | 166.835319   | 644.450563  | 3.86279456  | 61.5825099  | 69.9680382 | 1.13616738 | 2.70913481 | -1.4378322 | 0.00020561 | 0.04155707 |
| MIR34A     | 526.017483   | 2693.91335  | 5.12133804  | 135.681496  | 429.472581 | 3.16529956 | 3.87685496 | -1.9548868 | 0.00022396 | 0.04445838 |
| SNORD71    | 2738.57399   | 13212.4357  | 4.82456773  | 1118.03841  | 4036.23631 | 3.61010522 | 2.44944535 | -1.2924551 | 0.00024381 | 0.04754869 |
