# Supplementary material
Source: HighWire-hosted journal article supplement (https://thorax.bmj.com/content/76/2/134)
Supplement: inline-supplementary-material-10 [file inline-supplementary-material-10.pdf]

**Supplementary Table 8: List of enriched pathways for 773 differentially expressed genes in BAL for therapy effects**

| Function                                   | FDR         | Genes in network | Genes in genome |
|--------------------------------------------|-------------|------------------|-----------------|
| cilium                                     | 4.50E-15    | 97               | 596             |
| ciliary part                               | 1.91E-10    | 71               | 446             |
| cilium organization                        | 1.91E-10    | 64               | 383             |
| cilium assembly                            | 4.43E-10    | 60               | 367             |
| cell projection assembly                   | 2.69E-08    | 73               | 570             |
| axoneme                                    | 1.28E-07    | 38               | 117             |
| axonemal dynein complex assembly           | 2.81E-05    | 15               | 33              |
| organelle assembly                         | 2.92E-05    | 72               | 823             |
| motile cilium                              | 0.001507113 | 45               | 177             |
| plasma membrane region                     | 0.001507113 | 61               | 1144            |
| axoneme part                               | 0.004331309 | 15               | 36              |
| cilium movement                            | 0.006620196 | 28               | 63              |
| cell chemotaxis                            | 0.007785826 | 25               | 293             |
| cytokine activity                          | 0.007785826 | 20               | 219             |
| axonemal dynein complex                    | 0.00948436  | 8                | 17              |
| ciliary transition zone                    | 0.012080052 | 11               | 68              |
| epithelial cell differentiation            | 0.012080052 | 58               | 763             |
| glomerular epithelial cell differentiation | 0.035903722 | 6                | 19              |
| inflammatory response                      | 0.035903722 | 46               | 684             |
