# Supplementary material
Source: HighWire-hosted journal article supplement (https://thorax.bmj.com/content/76/2/134)
Supplement: inline-supplementary-material-11 [file inline-supplementary-material-11.pdf]

Supplementary Table 9: List of differentially expressed miRNAs in BAL for therapy effects and their target genes

| database | mature_mirna_acc | mature_mirna_id | target_symbol | target_entrez | target_ensembl  | experiment                                                                                                                     | support_type          | pubmed_id | type      |
|----------|------------------|-----------------|---------------|---------------|-----------------|--------------------------------------------------------------------------------------------------------------------------------|-----------------------|-----------|-----------|
| miRbase  | MIMAT0000646     | hsa-miR-155-5p  | CCND1         | 595           | ENSG00000110092 | Luciferase reporter assay                                                                                                      | Functional MTI        | 19538740  | validated |
| miRbase  | MIMAT0000646     | hsa-miR-155-5p  | BCL6          | 604           | ENSG00000113916 | Luciferase reporter assay                                                                                                      | Functional MTI        | 23041630  | validated |
| miRbase  | MIMAT0000646     | hsa-miR-155-5p  | CCND1         | 595           | ENSG00000110092 | Luciferase reporter assay//Western blot                                                                                        | Functional MTI        | 22858023  | validated |
| miRbase  | MIMAT0000646     | hsa-miR-155-5p  | CCND1         | 595           | ENSG00000110092 | Proteomics                                                                                                                     | Functional MTI (Weak) | 18668040  | validated |
| miRbase  | MIMAT0000646     | hsa-miR-155-5p  | EGFR          | 1956          | ENSG00000146648 | Proteomics                                                                                                                     | Functional MTI (Weak) | 18668040  | validated |
| miRbase  | MIMAT0000646     | hsa-miR-155-5p  | PODXL         | 5420          | ENSG00000128567 | pSILAC//Proteomics;Other                                                                                                       | Functional MTI (Weak) | 18668040  | validated |
| miRbase  | MIMAT0000646     | hsa-miR-155-5p  | ITGB4         | 3691          | ENSG00000132470 | Proteomics                                                                                                                     | Functional MTI (Weak) | 18668040  | validated |
| miRbase  | MIMAT0000646     | hsa-miR-155-5p  | TACSTD2       | 4070          | ENSG00000184292 | pSILAC//Proteomics;Other                                                                                                       | Functional MTI (Weak) | 18668040  | validated |
| miRbase  | MIMAT0000646     | hsa-miR-155-5p  | MYO1D         | 4642          | ENSG00000176658 | Reporter assay;Other                                                                                                           | Non-Functional MTI    | 20584899  | validated |
| miRbase  | MIMAT0000646     | hsa-miR-155-5p  | PLS1          | 5357          | ENSG00000120756 | Reporter assay;Other                                                                                                           | Non-Functional MTI    | 20584899  | validated |
| miRbase  | MIMAT0000646     | hsa-miR-155-5p  | PPL           | 5493          | ENSG00000118898 | pSILAC//Proteomics;Other                                                                                                       | Functional MTI (Weak) | 18668040  | validated |
| miRbase  | MIMAT0000646     | hsa-miR-155-5p  | PPL           | 5493          | ENSG00000118898 | Microarray//qRT-PCR                                                                                                            | Functional MTI (Weak) | 22815788  | validated |
| miRbase  | MIMAT0000646     | hsa-miR-155-5p  | TPBG          | 7162          | ENSG00000146242 | Proteomics                                                                                                                     | Functional MTI (Weak) | 18668040  | validated |
| miRbase  | MIMAT0000646     | hsa-miR-155-5p  | FUBP3         | 8939          | ENSG00000107164 | Proteomics                                                                                                                     | Functional MTI (Weak) | 18668040  | validated |
| miRbase  | MIMAT0000646     | hsa-miR-155-5p  | CLDN1         | 9076          | ENSG00000163347 | Immunocytochemistry//Immunohistochemistry//In situ hybridization//Luciferase reporter assay//Microarray//qRT-PCR//Western blot | Functional MTI        | 24604078  | validated |
| miRbase  | MIMAT0000646     | hsa-miR-155-5p  | CLDN1         | 9076          | ENSG00000163347 | pSILAC//Proteomics;Other                                                                                                       | Functional MTI (Weak) | 18668040  | validated |
| miRbase  | MIMAT0000646     | hsa-miR-155-5p  | SLC9A3R2      | 9351          | ENSG00000065054 | Proteomics                                                                                                                     | Functional MTI (Weak) | 18668040  | validated |
| miRbase  | MIMAT0000646     | hsa-miR-155-5p  | NCKAP1        | 10787         | ENSG00000061676 | Proteomics                                                                                                                     | Functional MTI (Weak) | 18668040  | validated |
| miRbase  | MIMAT0000646     | hsa-miR-155-5p  | SLC27A2       | 11001         | ENSG00000140284 | Proteomics                                                                                                                     | Functional MTI (Weak) | 18668040  | validated |
| miRbase  | MIMAT0000646     | hsa-miR-155-5p  | FSTL1         | 11167         | ENSG00000163430 | Proteomics                                                                                                                     | Functional MTI (Weak) | 18668040  | validated |
| miRbase  | MIMAT0000646     | hsa-miR-155-5p  | PHGDH         | 26227         | ENSG00000092621 | Proteomics                                                                                                                     | Functional MTI (Weak) | 18668040  | validated |
| miRbase  | MIMAT0000646     | hsa-miR-155-5p  | PLEKHA5       | 54477         | ENSG00000052126 | Proteomics                                                                                                                     | Functional MTI (Weak) | 18668040  | validated |
| miRbase  | MIMAT0000646     | hsa-miR-155-5p  | TNKS1BP1      | 85456         | ENSG00000149115 | Proteomics                                                                                                                     | Functional MTI (Weak) | 18668040  | validated |
| miRbase  | MIMAT0000646     | hsa-miR-155-5p  | CXCL8         | 3576          | ENSG00000169429 | Western blot                                                                                                                   | Functional MTI        | 21030878  | validated |
| miRbase  | MIMAT0000646     | hsa-miR-155-5p  | TPBG          | 7162          | ENSG00000283085 | Proteomics                                                                                                                     | Functional MTI (Weak) | 18668040  | validated |
| miRbase  | MIMAT0000077     | hsa-miR-22-3p   | ERBB3         | 2065          | ENSG00000065361 | Luciferase reporter assay//qRT-PCR//Western blot                                                                               | Functional MTI        | 22484852  | validated |
| miRbase  | MIMAT0000077     | hsa-miR-22-3p   | NET1          | 10276         | ENSG00000173848 | Luciferase reporter assay//qRT-PCR//Western blot                                                                               | Functional MTI        | 25041463  | validated |
| miRbase  | MIMAT0000077     | hsa-miR-22-3p   | TRAF3IP1      | 26146         | ENSG00000204104 | HITS-CLIP                                                                                                                      | Functional MTI (Weak) | 19536157  | validated |
| miRbase  | MIMAT0000077     | hsa-miR-22-3p   | IFT140        | 9742          | ENSG00000187535 | PAR-CLIP                                                                                                                       | Functional MTI (Weak) | 20371350  | validated |
| miRbase  | MIMAT0000077     | hsa-miR-22-3p   | C1orf87       | 127795        | ENSG00000162598 | HITS-CLIP                                                                                                                      | Functional MTI (Weak) | 23824327  | validated |
| miRbase  | MIMAT0000084     | hsa-miR-27a-3p  | CCND1         | 595           | ENSG00000110092 | Luciferase reporter assay//qRT-PCR//Western blot                                                                               | Functional MTI        | 21569481  | validated |
| miRbase  | MIMAT0000084     | hsa-miR-27a-3p  | BTG2          | 7832          | ENSG00000159388 | PAR-CLIP                                                                                                                       | Functional MTI (Weak) | 24398324  | validated |
| miRbase  | MIMAT0000084     | hsa-miR-27a-3p  | EGFR          | 1956          | ENSG00000146648 | Luciferase reporter assay                                                                                                      | Functional MTI        | 23559009  | validated |
| miRbase  | MIMAT0000084     | hsa-miR-27a-3p  | EGFR          | 1956          | ENSG00000146648 | Luciferase reporter assay//qRT-PCR//Western blot                                                                               | Functional MTI        | 23650389  | validated |
| miRbase  | MIMAT0000084     | hsa-miR-27a-3p  | CNN3          | 1266          | ENSG00000117519 | Microarray//qRT-PCR                                                                                                            | Functional MTI (Weak) | 22815788  | validated |
| miRbase  | MIMAT0000084     | hsa-miR-27a-3p  | TP53INP2      | 58476         | ENSG00000078804 | HITS-CLIP                                                                                                                      | Functional MTI (Weak) | 19536157  | validated |
| miRbase  | MIMAT0000084     | hsa-miR-27a-3p  | SLC7A2        | 6542          | ENSG00000003989 | PAR-CLIP                                                                                                                       | Functional MTI (Weak) | 20371350  | validated |
| miRbase  | MIMAT0000084     | hsa-miR-27a-3p  | NR2F2         | 7026          | ENSG00000185551 | HITS-CLIP                                                                                                                      | Functional MTI (Weak) | 23824327  | validated |
| miRbase  | MIMAT0000084     | hsa-miR-27a-3p  | IER3          | 8870          | ENSG00000230128 | HITS-CLIP                                                                                                                      | Functional MTI (Weak) | 22473208  | validated |
| miRbase  | MIMAT0000084     | hsa-miR-27a-3p  | IER3          | 8870          | ENSG00000237155 | HITS-CLIP                                                                                                                      | Functional MTI (Weak) | 22473208  | validated |
| miRbase  | MIMAT0000084     | hsa-miR-27a-3p  | IER3          | 8870          | ENSG00000227231 | HITS-CLIP                                                                                                                      | Functional MTI (Weak) | 22473208  | validated |
| miRbase  | MIMAT0000084     | hsa-miR-27a-3p  | IER3          | 8870          | ENSG00000137331 | HITS-CLIP                                                                                                                      | Functional MTI (Weak) | 22473208  | validated |
| miRbase  | MIMAT0000084     | hsa-miR-27a-3p  | IER3          | 8870          | ENSG00000206478 | HITS-CLIP                                                                                                                      | Functional MTI (Weak) | 22473208  | validated |
| miRbase  | MIMAT0000084     | hsa-miR-27a-3p  | IER3          | 8870          | ENSG00000235030 | HITS-CLIP                                                                                                                      | Functional MTI (Weak) | 22473208  | validated |
| miRbase  | MIMAT0000084     | hsa-miR-27a-3p  | ABHD17C       | 58489         | ENSG00000136379 | Sequencing//PAR-CLIP                                                                                                           | Functional MTI (Weak) | 20371350  | validated |
| miRbase  | MIMAT0000084     | hsa-miR-27a-3p  | ABHD17C       | 58489         | ENSG00000136379 | HITS-CLIP                                                                                                                      | Functional MTI (Weak) | 22473208  | validated |
| miRbase  | MIMAT0000254     | hsa-miR-10b-5p  | TRIM2         | 23321         | ENSG00000109654 | PAR-CLIP                                                                                                                       | Functional MTI (Weak) | 20371350  | validated |
| miRbase  | MIMAT0000254     | hsa-miR-10b-5p  | TRIM2         | 23321         | ENSG00000109654 | PAR-CLIP                                                                                                                       | Functional MTI (Weak) | 21572407  | validated |
| miRbase  | MIMAT0000254     | hsa-miR-10b-5p  | SDC1          | 6382          | ENSG00000115884 | Luciferase reporter assay                                                                                                      | Functional MTI        | 22573479  | validated |
| miRbase  | MIMAT0000254     | hsa-miR-10b-5p  | SDC1          | 6382          | ENSG00000115884 | Luciferase reporter assay                                                                                                      | Functional MTI        | 23206733  | validated |
| miRbase  | MIMAT0000254     | hsa-miR-10b-5p  | SDC1          | 6382          | ENSG00000115884 | 3'LIFE                                                                                                                         | Functional MTI (Weak) | 25074381  | validated |
| miRbase  | MIMAT0000254     | hsa-miR-10b-5p  | NR4A3         | 8013          | ENSG00000119508 | Reporter assay                                                                                                                 | Non-Functional MTI    | 21642433  | validated |
| miRbase  | MIMAT0000254     | hsa-miR-10b-5p  | KIF21A        | 55605         | ENSG00000139116 | CLASH                                                                                                                          | Functional MTI (Weak) | 23622248  | validated |
| miRbase  | MIMAT0000254     | hsa-miR-10b-5p  | STK33         | 65975         | ENSG00000130413 | CLASH                                                                                                                          | Functional MTI (Weak) | 23622248  | validated |

|            |              |                 |          |        |                 |                |                       |          |           |
|------------|--------------|-----------------|----------|--------|-----------------|----------------|-----------------------|----------|-----------|
| mirTarbase | MIMAT0000254 | hsa-miR-10b-5p  | SYNPO    | 11346  | ENSG00000171992 | PAR-CLIP       | Functional MTI (Weak) | 22012620 | validated |
| mirTarbase | MIMAT0004495 | hsa-miR-22-5p   | ERBB2    | 2064   | ENSG00000141736 | HITS-CLIP      | Functional MTI (Weak) | 24906430 | validated |
| mirTarbase | MIMAT0004495 | hsa-miR-22-5p   | CCDC113  | 29070  | ENSG00000103021 | CLASH          | Functional MTI (Weak) | 23622248 | validated |
| mirTarbase | MIMAT0004556 | hsa-miR-10b-3p  | CLDN1    | 9076   | ENSG00000163347 | PAR-CLIP       | Functional MTI (Weak) | 23592263 | validated |
| mirTarbase | MIMAT0019756 | hsa-miR-4674    | SPA17    | 53340  | ENSG00000064199 | HITS-CLIP      | Functional MTI (Weak) | 19536157 | validated |
| mirTarbase | MIMAT0022707 | hsa-miR-570-5p  | HS3ST1   | 9957   | ENSG00000002587 | PAR-CLIP       | Functional MTI (Weak) | 22100165 | validated |
| mirTarbase | MIMAT0021021 | hsa-miR-5001-5p | PODXL    | 5420   | ENSG00000128567 | PAR-CLIP       | Functional MTI (Weak) | 22012620 | validated |
| mirTarbase | MIMAT0021021 | hsa-miR-5001-5p | ATP8B1   | 5205   | ENSG00000081923 | PAR-CLIP       | Functional MTI (Weak) | 23446348 | validated |
| mirTarbase | MIMAT0007882 | hsa-miR-1909-5p | IGFBP3   | 3486   | ENSG00000146674 | HITS-CLIP      | Functional MTI (Weak) | 23313552 | validated |
| mirTarbase | MIMAT0007882 | hsa-miR-1909-5p | CERS4    | 79603  | ENSG00000090661 | HITS-CLIP      | Functional MTI (Weak) | 19536157 | validated |
| mirTarbase | MIMAT0021022 | hsa-miR-5001-3p | C3       | 718    | ENSG00000125730 | PAR-CLIP       | Functional MTI (Weak) | 21572407 | validated |
| mirTarbase | MIMAT0021022 | hsa-miR-5001-3p | FAM179A  | 165186 | ENSG00000189350 | PAR-CLIP       | Functional MTI (Weak) | 22291592 | validated |
| mirTarbase | MIMAT0021022 | hsa-miR-5001-3p | FAM179A  | 165186 | ENSG00000189350 | PAR-CLIP       | Functional MTI (Weak) | 23708386 | validated |
| mirTarbase | MIMAT0021022 | hsa-miR-5001-3p | FAM229B  | 619208 | ENSG00000203778 | HITS-CLIP      | Functional MTI (Weak) | 23824327 | validated |
| mirTarbase | MIMAT0003235 | hsa-miR-570-3p  | PODXL    | 5420   | ENSG00000128567 | PAR-CLIP       | Functional MTI (Weak) | 22012620 | validated |
| mirTarbase | MIMAT0003235 | hsa-miR-570-3p  | SLC5A8   | 160728 | ENSG00000256870 | HITS-CLIP      | Functional MTI (Weak) | 23824327 | validated |
| mirTarbase | MIMAT0003235 | hsa-miR-570-3p  | SLC5A8   | 160728 | ENSG00000262217 | HITS-CLIP      | Functional MTI (Weak) | 23824327 | validated |
| mirTarbase | MIMAT0019796 | hsa-miR-4700-5p | EFNA1    | 1942   | ENSG00000169242 | PAR-CLIP       | Functional MTI (Weak) | 23592263 | validated |
| mirTarbase | MIMAT0019797 | hsa-miR-4700-3p | CMTM4    | 146223 | ENSG00000183723 | PAR-CLIP       | Functional MTI (Weak) | 22100165 | validated |
| mirTarbase | MIMAT0007883 | hsa-miR-1909-3p | IGFBP4   | 3487   | ENSG00000141753 | PAR-CLIP       | Functional MTI (Weak) | 23592263 | validated |
| mirTarbase | MIMAT0007883 | hsa-miR-1909-3p | BCAM     | 4059   | ENSG00000187244 | PAR-CLIP       | Functional MTI (Weak) | 23592263 | validated |
| mirTarbase | MIMAT0007883 | hsa-miR-1909-3p | C9orf3   | 84909  | ENSG00000148120 | PAR-CLIP       | Functional MTI (Weak) | 23592263 | validated |
| mirTarbase | MIMAT0017981 | hsa-miR-3605-5p | SOD2     | 6648   | ENSG00000112096 | PAR-CLIP       | Functional MTI (Weak) | 21572407 | validated |
| mirTarbase | MIMAT0017981 | hsa-miR-3605-5p | SOD2     | 6648   | ENSG00000112096 | PAR-CLIP       | Functional MTI (Weak) | 23446348 | validated |
| mirTarbase | MIMAT0017981 | hsa-miR-3605-5p | SOD2     | 6648   | ENSG00000112096 | PAR-CLIP       | Functional MTI (Weak) | 23592263 | validated |
| mirTarbase | MIMAT0017981 | hsa-miR-3605-5p | SOD2     | 6648   | ENSG00000112096 | PAR-CLIP       | Functional MTI (Weak) | 24398324 | validated |
| mirTarbase | MIMAT0017981 | hsa-miR-3605-5p | EPHA2    | 1969   | ENSG00000142627 | PAR-CLIP       | Functional MTI (Weak) | 23592263 | validated |
| mirTarbase | MIMAT0017981 | hsa-miR-3605-5p | NUCB2    | 4925   | ENSG00000070081 | PAR-CLIP       | Functional MTI (Weak) | 23592263 | validated |
| mirTarbase | MIMAT0017981 | hsa-miR-3605-5p | GPRC5C   | 55890  | ENSG00000170412 | PAR-CLIP       | Functional MTI (Weak) | 20371350 | validated |
| mirTarbase | MIMAT0017981 | hsa-miR-3605-5p | SLC23A1  | 9963   | ENSG00000170482 | PAR-CLIP       | Functional MTI (Weak) | 22291592 | validated |
| mirTarbase | MIMAT0005896 | hsa-miR-1244    | TRIM2    | 23321  | ENSG00000109654 | PAR-CLIP       | Functional MTI (Weak) | 20371350 | validated |
| mirTarbase | MIMAT0005896 | hsa-miR-1244    | TRIM2    | 23321  | ENSG00000109654 | PAR-CLIP       | Functional MTI (Weak) | 21572407 | validated |
| mirTarbase | MIMAT0005896 | hsa-miR-1244    | GALNT3   | 2591   | ENSG00000115339 | PAR-CLIP       | Functional MTI (Weak) | 22012620 | validated |
| mirTarbase | MIMAT0005896 | hsa-miR-1244    | WFDC6    | 140870 | ENSG00000243543 | HITS-CLIP      | Functional MTI (Weak) | 23313552 | validated |
| mirTarbase | MIMAT0017982 | hsa-miR-3605-3p | PODXL    | 5420   | ENSG00000128567 | PAR-CLIP       | Functional MTI (Weak) | 23592263 | validated |
| mirTarbase | MIMAT0017982 | hsa-miR-3605-3p | TMC5     | 79838  | ENSG00000103534 | PAR-CLIP       | Functional MTI (Weak) | 20371350 | validated |
| mirTarbase | MIMAT0017982 | hsa-miR-3605-3p | TMC5     | 79838  | ENSG00000103534 | HITS-CLIP      | Functional MTI (Weak) | 21572407 | validated |
| tarbase    | MIMAT0000646 | hsa-miR-155-5p  | CLDN1    | 9076   | ENSG00000163347 | Proteomics     | positive              | NA       | validated |
| tarbase    | MIMAT0000646 | hsa-miR-155-5p  | EGFR     | 1956   | ENSG00000146648 | Proteomics     | positive              | NA       | validated |
| tarbase    | MIMAT0000646 | hsa-miR-155-5p  | FSTL1    | 11167  | ENSG00000163430 | Proteomics     | positive              | NA       | validated |
| tarbase    | MIMAT0000646 | hsa-miR-155-5p  | FUBP3    | 8939   | ENSG00000107164 | Proteomics     | positive              | NA       | validated |
| tarbase    | MIMAT0000646 | hsa-miR-155-5p  | ITGB4    | 3691   | ENSG00000132470 | Proteomics     | positive              | NA       | validated |
| tarbase    | MIMAT0000646 | hsa-miR-155-5p  | MYO1D    | 4642   | ENSG00000176658 | Other          | positive              | NA       | validated |
| tarbase    | MIMAT0000646 | hsa-miR-155-5p  | MYO1D    | 4642   | ENSG00000176658 | Reporter assay | negative              | NA       | validated |
| tarbase    | MIMAT0000646 | hsa-miR-155-5p  | NCKAP1   | 10787  | ENSG00000061676 | Proteomics     | positive              | NA       | validated |
| tarbase    | MIMAT0000646 | hsa-miR-155-5p  | PHGDH    | 26227  | ENSG00000092621 | Proteomics     | positive              | NA       | validated |
| tarbase    | MIMAT0000646 | hsa-miR-155-5p  | PLEKHA5  | 54477  | ENSG00000052126 | Proteomics     | positive              | NA       | validated |
| tarbase    | MIMAT0000646 | hsa-miR-155-5p  | PLS1     | 5357   | ENSG00000120756 | Other          | positive              | NA       | validated |
| tarbase    | MIMAT0000646 | hsa-miR-155-5p  | PLS1     | 5357   | ENSG00000120756 | Reporter assay | negative              | NA       | validated |
| tarbase    | MIMAT0000646 | hsa-miR-155-5p  | PODXL    | 5420   | ENSG00000128567 | Proteomics     | positive              | NA       | validated |
| tarbase    | MIMAT0000646 | hsa-miR-155-5p  | PPL      | 5493   | ENSG00000118898 | Proteomics     | positive              | NA       | validated |
| tarbase    | MIMAT0000646 | hsa-miR-155-5p  | SLC27A2  | 11001  | ENSG00000140284 | Proteomics     | positive              | NA       | validated |
| tarbase    | MIMAT0000646 | hsa-miR-155-5p  | SLC9A3R2 | 9351   | ENSG00000065054 | Proteomics     | positive              | NA       | validated |
| tarbase    | MIMAT0000646 | hsa-miR-155-5p  | TACSTD2  | 4070   | ENSG00000184292 | Proteomics     | positive              | NA       | validated |
| tarbase    | MIMAT0000646 | hsa-miR-155-5p  | TNKS1BP1 | 85456  | ENSG00000149115 | Proteomics     | positive              | NA       | validated |
| tarbase    | MIMAT0000646 | hsa-miR-155-5p  | TPBG     | 7162   | ENSG00000146242 | Proteomics     | positive              | NA       | validated |
| tarbase    | MIMAT0000254 | hsa-miR-10b-5p  | NR4A3    | 8013   | ENSG00000119508 | Reporter assay | negative              | NA       | validated |
