# Supplementary material
Source: HighWire-hosted journal article supplement (https://thorax.bmj.com/content/76/2/134)
Supplement: inline-supplementary-material-13 [file inline-supplementary-material-13.pdf]

Supplementary Table 10: List of 5 overlapping differentially expressed genes between BAL and PBMC in genotype effects

|         | PiMZ.off avg | PiZZ.off avg | FC         | log2FC     | PValue     | FDR        |
|---------|--------------|--------------|------------|------------|------------|------------|
| RNU2-2P | 11.4803745   | 119.963279   | 10.4494221 | 3.38535125 | 1.03E-07   | 0.00011326 |
| SPA17   | 123.931599   | 83.8395707   | 1.47819935 | -0.5638408 | 0.00011969 | 0.02933685 |
| RNU5A-1 | 0.4865785    | 38.5653337   | 79.2581957 | 6.30848822 | 1.93E-10   | 4.52E-07   |
| RNU2-1  | 31.6308104   | 191.957658   | 6.06869236 | 2.60138569 | 2.61E-08   | 3.90E-05   |
| EGR3    | 32.46861     | 177.972335   | 5.48136602 | 2.45453547 | 1.59E-09   | 2.90E-06   |

  

|         | PiMZ.off avg | PiZZ.off avg | FC         | log2FC     | PValue     | FDR        |
|---------|--------------|--------------|------------|------------|------------|------------|
| RNU2-2P | 55.6603932   | 858.208745   | 15.4186612 | 3.9466056  | 1.83E-09   | 1.57E-06   |
| SPA17   | 25.1471467   | 61.513848    | 2.44615617 | 1.29051651 | 0.00015581 | 0.01947651 |
| RNU5A-1 | 2.02689691   | 54.4742258   | 26.8756766 | 4.74822917 | 1.47E-07   | 5.44E-05   |
| RNU2-1  | 123.039606   | 625.966792   | 5.08752273 | 2.34696333 | 0.00015091 | 0.01917624 |
| EGR3    | 44.8550445   | 142.404904   | 3.17478013 | 1.66665668 | 0.00014562 | 0.01879718 |
