# Supplementary material
Source: HighWire-hosted journal article supplement (https://thorax.bmj.com/content/76/2/134)
Supplement: inline-supplementary-material-14 [file inline-supplementary-material-14.pdf]

Supplementary Table 11: List of 6 overlapping differentially expressed genes between BAL and PBMC in therapy effects

|          | PiZZ.off avg | PiZZ.on avg | FC         | logFC      | PValue     | FDR        |
|----------|--------------|-------------|------------|------------|------------|------------|
| MORN2    | 5.81677862   | 9.90480545  | 1.70279911 | 0.76790824 | 0.00069725 | 0.00975231 |
| SNORD13  | 17.8695748   | 6.72067727  | 2.65889495 | -1.4108268 | 0.00294085 | 0.02865749 |
| SPA17    | 3.27501666   | 6.26787182  | 1.91384426 | 0.93647343 | 0.00157806 | 0.01799586 |
| RNU4-1   | 9.08256172   | 6.93514773  | 1.30964214 | -0.3891727 | 0.00224106 | 0.02342388 |
| SNORD12C | 35.1290069   | 34.11915    | 1.02959795 | -0.0420811 | 0.00118116 | 0.01445895 |
| SNORD12  | 12.1542828   | 6.35918182  | 1.91129663 | -0.9345517 | 0.00101872 | 0.01294954 |

|          | PiZZ.off avg | PiZZ.on avg | FC         | logFC      | PValue   | FDR        |
|----------|--------------|-------------|------------|------------|----------|------------|
| MORN2    | 3.37994993   | 1.64333395  | 2.05676389 | -1.0403762 | 1.29E-05 | 0.0057445  |
| SNORD13  | 292.849819   | 4.20811455  | 69.5916937 | -6.1208432 | 2.70E-06 | 0.00249995 |
| SPA17    | 2.04134669   | 0.88032173  | 2.31886437 | -1.2134184 | 1.15E-06 | 0.00241992 |
| RNU4-1   | 71.4428772   | 4.51057182  | 15.8389845 | -3.9854079 | 4.82E-06 | 0.00314864 |
| SNORD12C | 257.384438   | 231.520773  | 1.11171207 | -0.1527832 | 9.26E-05 | 0.02422397 |
| SNORD12  | 106.355069   | 5.07442273  | 20.9590479 | -4.3895013 | 1.59E-05 | 0.00668777 |
