# Supplementary material
Source: HighWire-hosted journal article supplement (https://thorax.bmj.com/content/76/2/134)
Supplement: inline-supplementary-material-17 [file inline-supplementary-material-17.pdf]

**Supplementary Table 12: List of 666 genes marked red in figure 3 that visually differentiated clusters 2 and 3**

|             | group 2 avg | group 2 sd | group 3 avg | group 3 sd | FC         | logFC      |
|-------------|-------------|------------|-------------|------------|------------|------------|
| LOC285484   | 0           | 0          | 0.01810586  | 0.0327206  | Inf        | Inf        |
| KIR2DL1     | 0.00019698  | 0.00102356 | 0.04033766  | 0.12501806 | 204.775885 | 7.67790202 |
| KIR2DL2     | 0.00079033  | 0.00410667 | 0.04423361  | 0.18788369 | 55.9685575 | 5.80654466 |
| KIR3DX1     | 0.00118973  | 0.00430089 | 0.0227923   | 0.03852748 | 19.1576091 | 4.25984561 |
| PDZK1IP1    | 0.0120123   | 0.03048899 | 0.20516608  | 0.34672501 | 17.0796668 | 4.09420792 |
| MMRN1       | 0.00129724  | 0.00322589 | 0.01751809  | 0.02904393 | 13.5041587 | 3.75533186 |
| TNFRSF13C   | 0.01177415  | 0.03468898 | 0.15619067  | 0.3184038  | 13.26556   | 3.72961368 |
| TCAF2P1     | 0.00182606  | 0.00542774 | 0.02205437  | 0.02692687 | 12.0775779 | 3.59425925 |
| RLN2        | 0.01266902  | 0.02469827 | 0.13661401  | 0.19561325 | 10.7833115 | 3.43072838 |
| INSL3       | 0.0194798   | 0.08920262 | 0.18269693  | 0.33744795 | 9.37879032 | 3.22940186 |
| LOC10050555 | 0.0255723   | 0.06242097 | 0.22450113  | 0.24254849 | 8.77907459 | 3.13406887 |
| NUGGC       | 0.04499276  | 0.05066229 | 0.38793592  | 0.39959135 | 8.62218456 | 3.10805344 |
| FCRL5       | 0.00746028  | 0.01392186 | 0.06354694  | 0.1269395  | 8.51803669 | 3.09052095 |
| LOC10192748 | 0.03730432  | 0.06629969 | 0.31773964  | 0.3789806  | 8.51750201 | 3.09043038 |
| DOC2GP      | 0.01365504  | 0.04952461 | 0.11414524  | 0.25389348 | 8.35920411 | 3.06336559 |
| CCR8        | 0.05110063  | 0.06744294 | 0.41492774  | 0.38787953 | 8.11981591 | 3.02144702 |
| GLB1L3      | 0.00439813  | 0.00672917 | 0.03404923  | 0.05254988 | 7.74174312 | 2.95265844 |
| GZMH        | 0.93155028  | 1.23517108 | 6.88897117  | 9.092698   | 7.39516839 | 2.886583   |
| LINC00426   | 0.07048157  | 0.08434009 | 0.51711288  | 0.39828582 | 7.33685235 | 2.87516125 |
| SYNGR3      | 0.03047795  | 0.03713027 | 0.21729968  | 0.25899474 | 7.12973366 | 2.83384818 |
| GZMK        | 0.58406275  | 0.61193474 | 4.13537548  | 8.12484641 | 7.08036164 | 2.82382305 |
| GZMA        | 1.59157504  | 1.28944652 | 11.1507319  | 13.1751834 | 7.00609875 | 2.80861132 |
| IGLL5       | 0.19034409  | 0.32844602 | 1.33032132  | 2.83167441 | 6.98903404 | 2.80509307 |
| B3GAT1      | 0.02211549  | 0.04113053 | 0.15331529  | 0.14000173 | 6.93248453 | 2.79337249 |
| NBL1        | 0.07160343  | 0.11469574 | 0.49466354  | 0.64854986 | 6.90837738 | 2.78834689 |
| LINC00892   | 0.36028254  | 0.36043903 | 2.47645042  | 1.90479553 | 6.87363419 | 2.78107308 |
| GPR174      | 0.18412317  | 0.17964951 | 1.26287521  | 1.06112107 | 6.85886101 | 2.77796902 |
| PRTFDC1     | 0.0041435   | 0.01324408 | 0.02810785  | 0.06375707 | 6.78360132 | 2.76205138 |
| GPR25       | 0.07518413  | 0.10728933 | 0.50525087  | 0.43144611 | 6.72017941 | 2.74849975 |
| THEMIS      | 0.26184956  | 0.16378276 | 1.73566198  | 1.65597634 | 6.62847012 | 2.72867593 |
| SLC14A1     | 0.0073932   | 0.01886136 | 0.04840051  | 0.06526873 | 6.54662634 | 2.71075164 |
| JCHAIN      | 0.34766809  | 0.27038767 | 2.26160038  | 5.75075282 | 6.50505605 | 2.70156149 |
| UGT8        | 0.00361752  | 0.00852439 | 0.02310336  | 0.03970047 | 6.38651513 | 2.67502893 |
| POU2AF1     | 0.02140636  | 0.02321959 | 0.13624998  | 0.14889212 | 6.36492885 | 2.67014439 |
| TRAT1       | 0.35525602  | 0.27276737 | 2.25167879  | 1.73956235 | 6.33818626 | 2.66407006 |
| CCL5        | 6.28860396  | 5.10000515 | 39.8482565  | 44.7132863 | 6.33658228 | 2.66370491 |
| GNLY        | 1.25147974  | 1.52840668 | 7.88663358  | 7.94289161 | 6.30184679 | 2.65577468 |
| CD96        | 0.56301017  | 0.31039736 | 3.51169571  | 2.86461486 | 6.23735746 | 2.64093494 |
| GZMB        | 1.44071956  | 1.12212935 | 8.95852288  | 11.9174787 | 6.21808932 | 2.63647134 |
| SH2D2A      | 0.48524886  | 0.36750936 | 3.01587021  | 2.97763449 | 6.2151001  | 2.63577763 |
| SLA2        | 0.48852211  | 0.29108354 | 3.02720869  | 3.04579467 | 6.19666673 | 2.63149238 |
| FSD1        | 0.01601426  | 0.03739742 | 0.09922711  | 0.11499317 | 6.19617209 | 2.63137721 |
| IL12RB2     | 0.09705867  | 0.06793307 | 0.60008216  | 0.59241632 | 6.18267446 | 2.62823105 |
| AFAP1L2     | 0.01754869  | 0.02667657 | 0.10803521  | 0.1312316  | 6.15631175 | 2.62206629 |
| SCML4       | 0.1608846   | 0.13038753 | 0.98075385  | 0.75742145 | 6.09600835 | 2.60786488 |
| LINC01260   | 0.04638987  | 0.06454706 | 0.28253256  | 0.40856526 | 6.09039292 | 2.60653531 |
| VIPR1       | 0.02432363  | 0.03603023 | 0.14774459  | 0.16238692 | 6.07411883 | 2.60267513 |
| RAB27B      | 0.02408278  | 0.02128931 | 0.14597002  | 0.16550382 | 6.06117717 | 2.59959801 |
| IL32        | 3.62018982  | 2.42056331 | 21.8393594  | 19.9296256 | 6.03265588 | 2.59279329 |

|           |            |            |            |            |            |            |
|-----------|------------|------------|------------|------------|------------|------------|
| NCR1      | 0.05403209 | 0.08834303 | 0.32575795 | 0.52001303 | 6.02897161 | 2.59191194 |
| FASLG     | 0.23764372 | 0.17998526 | 1.42355367 | 1.33041698 | 5.99028536 | 2.58262473 |
| MIAT      | 0.32144928 | 0.20975936 | 1.91958777 | 1.40042729 | 5.97166615 | 2.57813351 |
| IGFBP3    | 0.02510511 | 0.04034243 | 0.14862995 | 0.151472   | 5.92030737 | 2.56567208 |
| IKZF3     | 0.44173267 | 0.24158121 | 2.60661892 | 2.13471487 | 5.90089689 | 2.56093425 |
| F2R       | 0.24021975 | 0.12736107 | 1.41504235 | 1.26025275 | 5.89061626 | 2.55841857 |
| PXYLP1    | 0.03291064 | 0.0363995  | 0.19222427 | 0.13141346 | 5.84079322 | 2.54616431 |
| PRF1      | 0.77566948 | 0.53383674 | 4.51654215 | 5.17800792 | 5.82276634 | 2.54170473 |
| ZNF831    | 0.08438874 | 0.06140996 | 0.48948402 | 0.32372437 | 5.80034793 | 2.53613944 |
| TAL1      | 0.00644937 | 0.01174021 | 0.03728549 | 0.08876141 | 5.78126128 | 2.53138427 |
| TBX21     | 0.17253784 | 0.13697584 | 0.99133374 | 0.76852976 | 5.74560198 | 2.52245805 |
| BCL11B    | 0.16861851 | 0.09648407 | 0.96834417 | 0.76516753 | 5.74281056 | 2.52175697 |
| TGFBR3    | 0.05271254 | 0.03250121 | 0.30169622 | 0.27794859 | 5.72342412 | 2.51687852 |
| SH2D1A    | 0.1621508  | 0.12367225 | 0.91850198 | 0.83990364 | 5.66449247 | 2.5019467  |
| DBH       | 0.01026128 | 0.01928324 | 0.05800655 | 0.06437279 | 5.65295381 | 2.49900491 |
| TMIGD2    | 0.11435374 | 0.14521283 | 0.64328589 | 0.6416285  | 5.62540295 | 2.49195644 |
| ATP1A3    | 0.04544567 | 0.04465002 | 0.25521634 | 0.18724886 | 5.61585561 | 2.48950584 |
| HOPX      | 0.9870594  | 0.73852169 | 5.534767   | 4.91276459 | 5.60732923 | 2.48731378 |
| NKG7      | 1.58680756 | 1.28456363 | 8.89509565 | 14.4594131 | 5.60565496 | 2.48688295 |
| CD40LG    | 0.5825414  | 0.40721471 | 3.25870085 | 2.64685094 | 5.59393865 | 2.48386443 |
| TC2N      | 0.27754756 | 0.1731116  | 1.55042306 | 1.05962994 | 5.58615268 | 2.48185501 |
| KCNQ5     | 0.00315381 | 0.00456762 | 0.01730024 | 0.02118742 | 5.48551141 | 2.45562613 |
| CXCR3     | 0.65944492 | 0.38110443 | 3.58074869 | 2.77191493 | 5.42994353 | 2.44093719 |
| CDHR1     | 0.0124987  | 0.01802525 | 0.06781385 | 0.08818369 | 5.42567271 | 2.43980202 |
| GRAP2     | 0.43113905 | 0.31029099 | 2.33914179 | 1.60805636 | 5.42549278 | 2.43975418 |
| PPP1R16B  | 0.62383882 | 0.30935568 | 3.35582698 | 2.87486904 | 5.37931738 | 2.42742311 |
| IL18RAP   | 0.2293542  | 0.15773314 | 1.23269585 | 1.11029751 | 5.37463824 | 2.42616765 |
| ST8SIA1   | 0.01797936 | 0.01348514 | 0.09622619 | 0.08702098 | 5.35203631 | 2.4200879  |
| ABCD2     | 0.03894318 | 0.03365154 | 0.20821499 | 0.17685115 | 5.34663583 | 2.41863142 |
| JAKMIP1   | 0.17138966 | 0.21435693 | 0.91583998 | 0.8532247  | 5.34361271 | 2.41781545 |
| LINC01550 | 0.01372801 | 0.02509554 | 0.07321705 | 0.09841116 | 5.3334052  | 2.41505694 |
| CD3E      | 2.36125441 | 1.45388634 | 12.5811892 | 8.6942895  | 5.32818028 | 2.4136429  |
| IL2RB     | 1.175121   | 0.69336739 | 6.24524646 | 4.83170144 | 5.31455608 | 2.40994919 |
| ITM2A     | 0.46707747 | 0.30977972 | 2.47528883 | 2.33337692 | 5.29952518 | 2.4058631  |
| LCK       | 1.69059793 | 0.93399487 | 8.92982563 | 6.18071065 | 5.28205169 | 2.40109842 |
| SAMD3     | 0.17467063 | 0.15299452 | 0.92018225 | 1.20653863 | 5.26809935 | 2.39728255 |
| TSPAN5    | 0.09107504 | 0.06695601 | 0.47870287 | 0.38603451 | 5.25613658 | 2.39400277 |
| PLXDC1    | 0.05833162 | 0.05206994 | 0.3061764  | 0.23726055 | 5.24889225 | 2.39201298 |
| GZMM      | 0.25287297 | 0.33780228 | 1.32604504 | 1.30462252 | 5.24391776 | 2.39064506 |
| EOMES     | 0.17169982 | 0.1154152  | 0.89647194 | 1.1828329  | 5.22115844 | 2.38436994 |
| NLRC3     | 0.35255783 | 0.16862711 | 1.83988821 | 1.30881973 | 5.21868486 | 2.38368629 |
| EPHA4     | 0.02687659 | 0.03316182 | 0.14006755 | 0.14274876 | 5.21150786 | 2.38170085 |
| LINC00861 | 0.33229184 | 0.30050262 | 1.73172594 | 1.47982949 | 5.21146091 | 2.38168786 |
| LY9       | 0.39196658 | 0.20456869 | 2.03095888 | 1.62257604 | 5.18145931 | 2.37335848 |
| CAMK2N1   | 0.02592453 | 0.03886362 | 0.13214145 | 0.14272034 | 5.09715944 | 2.34969348 |
| SH2D1B    | 0.05160319 | 0.04554132 | 0.26221192 | 0.47639082 | 5.08131271 | 2.34520125 |
| UBASH3A   | 0.34987843 | 0.27165859 | 1.77043002 | 1.4086806  | 5.06012904 | 2.33917418 |
| ZNF683    | 0.75736665 | 1.13005618 | 3.80707567 | 3.30945475 | 5.02672736 | 2.32961944 |
| INPP4B    | 0.11243197 | 0.08673199 | 0.56469019 | 0.45137603 | 5.0225057  | 2.3284073  |
| KLRC3     | 0.0749891  | 0.10691804 | 0.37637755 | 0.51426297 | 5.01909702 | 2.32742784 |
| CCDC141   | 0.00261344 | 0.00371813 | 0.01309654 | 0.01540419 | 5.01123353 | 2.32516577 |
| PTGDR     | 0.05409146 | 0.06594804 | 0.26983797 | 0.21224665 | 4.98854998 | 2.31862053 |

|             |            |            |            |            |            |            |
|-------------|------------|------------|------------|------------|------------|------------|
| LZTS1       | 0.04807353 | 0.0486097  | 0.23783221 | 0.20319939 | 4.94725954 | 2.30662959 |
| SPOCK2      | 1.32542707 | 0.73149534 | 6.54782896 | 3.86814992 | 4.94016539 | 2.30455934 |
| ZAP70       | 0.75990685 | 0.52542708 | 3.73737617 | 2.51110242 | 4.91820301 | 2.29813129 |
| CD8A        | 1.4592963  | 1.17404821 | 7.13849431 | 9.79134177 | 4.89173743 | 2.29034697 |
| ITM2C       | 0.4736768  | 0.25131552 | 2.2892474  | 3.34110407 | 4.83293118 | 2.27289845 |
| PLCXD2      | 0.0341641  | 0.03799593 | 0.16503658 | 0.12013534 | 4.8307022  | 2.27223292 |
| ITK         | 1.0098732  | 0.51857676 | 4.86882    | 3.20192635 | 4.82121912 | 2.269398   |
| IL31RA      | 0.0105281  | 0.03555224 | 0.0506839  | 0.05979556 | 4.814156   | 2.26728289 |
| APOBEC3D    | 0.23356996 | 0.18780266 | 1.12318931 | 0.82136014 | 4.80879176 | 2.26567445 |
| LOC440461   | 0.01804284 | 0.02495874 | 0.08647429 | 0.11502835 | 4.7927201  | 2.26084469 |
| CD79A       | 0.15457058 | 0.1921099  | 0.74018684 | 1.09118799 | 4.7886657  | 2.25962372 |
| SEPT1       | 1.33477448 | 0.65856087 | 6.36347396 | 5.09487502 | 4.76745252 | 2.25321857 |
| ETS1        | 1.51691856 | 0.67192429 | 7.220055   | 4.54809696 | 4.75968533 | 2.2508662  |
| KIR2DL4     | 0.03668346 | 0.09459103 | 0.17353914 | 0.21171529 | 4.73071894 | 2.24205945 |
| LINC00299   | 0.01082372 | 0.02798454 | 0.05118091 | 0.08410532 | 4.72858645 | 2.24140897 |
| DMWD        | 0.07735108 | 0.07807027 | 0.36532135 | 0.23900974 | 4.72289898 | 2.23967268 |
| LINC00943   | 0.01251762 | 0.0219071  | 0.0590795  | 0.07801267 | 4.71970626 | 2.23869707 |
| NELL2       | 0.131742   | 0.09965594 | 0.61376983 | 0.39941419 | 4.65887744 | 2.21998238 |
| RORC        | 0.12125477 | 0.10814133 | 0.56227033 | 0.47124541 | 4.63709853 | 2.21322238 |
| GNG2        | 0.69373204 | 0.27040548 | 3.20751354 | 2.21266124 | 4.62356266 | 2.20900494 |
| NPDC1       | 0.09031202 | 0.0894995  | 0.41526988 | 0.48206219 | 4.59816865 | 2.20105938 |
| HIST1H2BH   | 0.21178374 | 0.35640484 | 0.96445954 | 1.15596662 | 4.55398294 | 2.18712889 |
| LOC10099628 | 0.07256646 | 0.14070423 | 0.32947685 | 0.31987318 | 4.54034597 | 2.18280224 |
| TNFRSF25    | 0.66778993 | 0.51483209 | 3.0284016  | 1.77115553 | 4.5349615  | 2.1810903  |
| DOCK9       | 0.14048824 | 0.07813332 | 0.63521503 | 0.47033861 | 4.52148169 | 2.17679562 |
| APBA2       | 0.05642016 | 0.07058087 | 0.25479413 | 0.24782617 | 4.51601193 | 2.1750493  |
| ANO9        | 0.17690799 | 0.13102017 | 0.79866027 | 0.52170868 | 4.51455168 | 2.17458273 |
| GPR171      | 0.82342663 | 0.47608588 | 3.71667646 | 3.26817247 | 4.51367047 | 2.17430109 |
| LAG3        | 0.43290487 | 0.25425024 | 1.94890867 | 2.74678652 | 4.50193287 | 2.17054455 |
| MS4A1       | 0.15021376 | 0.13216219 | 0.67601114 | 0.59879176 | 4.50032771 | 2.17003006 |
| ZNF507      | 0.06665642 | 0.04491958 | 0.29972718 | 0.16776064 | 4.4965989  | 2.1688342  |
| LOXL1-AS1   | 0.05017862 | 0.05718057 | 0.22517566 | 0.16873282 | 4.48748222 | 2.16590622 |
| FRMPD3      | 0.01271124 | 0.01746973 | 0.05691599 | 0.06613143 | 4.47761012 | 2.16272892 |
| CD247       | 1.03377952 | 0.58383996 | 4.62704188 | 3.41703434 | 4.47584982 | 2.16216163 |
| DAPK2       | 0.16503712 | 0.10167745 | 0.73802006 | 0.66729998 | 4.47184288 | 2.1608695  |
| DTX3        | 0.10698597 | 0.09421962 | 0.47573545 | 0.42844677 | 4.44670859 | 2.15273786 |
| ANTXRPL1    | 0.03899413 | 0.15009193 | 0.17298468 | 0.17355827 | 4.43617223 | 2.14931538 |
| KLRD1       | 0.20663585 | 0.15618156 | 0.91662182 | 1.16592887 | 4.43592829 | 2.14923604 |
| RGS9        | 0.12021737 | 0.10610308 | 0.53265303 | 0.39591383 | 4.43074919 | 2.14755066 |
| BACH2       | 0.0292794  | 0.02454507 | 0.12950026 | 0.09962067 | 4.42291434 | 2.1449973  |
| STAT4       | 0.48318653 | 0.26097751 | 2.13665754 | 1.51803974 | 4.42201385 | 2.14470354 |
| ZSWIM5      | 0.01130869 | 0.01260686 | 0.04986438 | 0.05062723 | 4.40938491 | 2.14057742 |
| VSIG1       | 0.01391095 | 0.0136939  | 0.06103802 | 0.05759834 | 4.38776714 | 2.13348696 |
| DOK6        | 0.00725649 | 0.00924704 | 0.03159911 | 0.03268131 | 4.35459803 | 2.12253955 |
| RASGRP1     | 0.60750393 | 0.25248517 | 2.6438124  | 1.69685668 | 4.35192644 | 2.12165417 |
| THEM5       | 0.05053466 | 0.07373105 | 0.21876523 | 0.24410233 | 4.32901404 | 2.11403848 |
| ABLIM1      | 0.19498067 | 0.1019451  | 0.84095429 | 0.48932114 | 4.31301356 | 2.10869625 |
| BTBD11      | 0.04106285 | 0.03153554 | 0.17701067 | 0.1253447  | 4.31072588 | 2.10793082 |
| TRAF3IP3    | 1.24139607 | 0.72006131 | 5.35104108 | 3.07342127 | 4.31050266 | 2.10785612 |
| PYHIN1      | 0.3313994  | 0.23330214 | 1.42356471 | 1.24353621 | 4.29561648 | 2.10286519 |
| BTLA        | 0.0887307  | 0.07251019 | 0.38100154 | 0.31996848 | 4.29390874 | 2.10229153 |
| TNFRSF13B   | 0.02105781 | 0.05874161 | 0.09030562 | 0.13051875 | 4.28846266 | 2.10046056 |

|             |            |            |            |            |            |            |
|-------------|------------|------------|------------|------------|------------|------------|
| KLRK1       | 0.87173129 | 0.80820027 | 3.72089858 | 3.61855318 | 4.26840088 | 2.09369568 |
| GCNT4       | 0.01281027 | 0.01657013 | 0.05440817 | 0.06931804 | 4.24723118 | 2.08652264 |
| SYNE2       | 0.72455889 | 0.48328222 | 3.07680788 | 1.9819903  | 4.24645658 | 2.0862595  |
| P2RY10      | 0.29538967 | 0.18723001 | 1.25139983 | 0.84636577 | 4.23643741 | 2.08285155 |
| GPR18       | 0.13048024 | 0.1158386  | 0.55141048 | 0.57225857 | 4.22600751 | 2.07929533 |
| KIF5A       | 0.00761817 | 0.01574092 | 0.03214716 | 0.03860968 | 4.21979908 | 2.07717431 |
| ABCB1       | 0.05029328 | 0.04283782 | 0.21141156 | 0.16540727 | 4.20357471 | 2.07161671 |
| ITPRIPL1    | 0.18207195 | 0.21569862 | 0.76482506 | 0.65093957 | 4.20067481 | 2.07062111 |
| PDCD1       | 0.15741346 | 0.13444369 | 0.65899779 | 0.68717062 | 4.18641331 | 2.06571475 |
| LEF1        | 0.25584001 | 0.18374759 | 1.06651153 | 0.79700433 | 4.16866592 | 2.05958576 |
| ZFR2        | 0.00881595 | 0.01405472 | 0.03650207 | 0.09980522 | 4.14046062 | 2.04979127 |
| MZB1        | 0.10773059 | 0.15479974 | 0.44504572 | 0.9083906  | 4.1310991  | 2.04652567 |
| SIT1        | 0.57899719 | 0.30061469 | 2.38977258 | 2.03793617 | 4.12743383 | 2.04524509 |
| SLC38A1     | 0.49947222 | 0.22326894 | 2.05472077 | 1.25864227 | 4.11378387 | 2.040466   |
| SATB1-AS1   | 0.0290401  | 0.06316211 | 0.11921008 | 0.19511409 | 4.10501621 | 2.03738792 |
| LOC10192810 | 0.02392208 | 0.03399693 | 0.09803842 | 0.09760926 | 4.09824053 | 2.03500466 |
| WNT10B      | 0.0344504  | 0.04934519 | 0.14115638 | 0.13265328 | 4.09737966 | 2.03470158 |
| IFITM1      | 7.22145444 | 4.40675271 | 29.4367513 | 26.4899932 | 4.07629121 | 2.02725712 |
| KLRB1       | 1.41598993 | 1.18518225 | 5.77197548 | 5.36703836 | 4.07628287 | 2.02725417 |
| P2RY8       | 0.43866363 | 0.25880378 | 1.78027054 | 1.24202792 | 4.05839559 | 2.0209095  |
| PTPRCAP     | 5.41662037 | 2.85905598 | 21.975985  | 18.3436798 | 4.0571396  | 2.02046294 |
| CD226       | 0.37003045 | 0.25081613 | 1.49931769 | 1.15000122 | 4.05187649 | 2.0185902  |
| ATP8B2      | 0.60596485 | 0.27332635 | 2.44166588 | 1.31700613 | 4.02938531 | 2.01055977 |
| COLGALT2    | 0.05646772 | 0.07363147 | 0.22562913 | 0.17966518 | 3.99571884 | 1.99845507 |
| TTC22       | 0.04486629 | 0.04958631 | 0.17898917 | 0.1655503  | 3.98939071 | 1.99616842 |
| AGMAT       | 0.0361667  | 0.03315411 | 0.14411137 | 0.12687322 | 3.98464208 | 1.99445014 |
| PRKCQ-AS1   | 0.16788899 | 0.15662369 | 0.66798388 | 0.47453399 | 3.97872356 | 1.99230566 |
| LBH         | 0.85005926 | 0.50414502 | 3.37966135 | 2.70079356 | 3.975795   | 1.99124337 |
| FBXO2       | 0.0550411  | 0.07057308 | 0.21848637 | 0.22169054 | 3.96951305 | 1.98896204 |
| RLTPR       | 0.24244317 | 0.16005776 | 0.960529   | 0.55748198 | 3.96187285 | 1.98618258 |
| KLRC1       | 0.23663476 | 0.24832488 | 0.93401427 | 0.89705966 | 3.94707138 | 1.98078261 |
| CD8B        | 0.72897788 | 0.66783745 | 2.87488879 | 4.56304921 | 3.9437257  | 1.97955921 |
| STYK1       | 0.03147017 | 0.03473056 | 0.12406029 | 0.13150472 | 3.94215514 | 1.97898455 |
| KIF5C       | 0.04894726 | 0.03674964 | 0.19185838 | 0.12231413 | 3.91969631 | 1.97074188 |
| CAMK4       | 0.21973983 | 0.18357905 | 0.85551869 | 0.63192222 | 3.89332546 | 1.96100295 |
| MMP25-AS1   | 0.05560631 | 0.05867038 | 0.2161528  | 0.17334478 | 3.88719942 | 1.95873112 |
| TSPAN2      | 0.12084282 | 0.10278336 | 0.46932267 | 0.32102459 | 3.8837447  | 1.95744837 |
| ACSL6       | 0.01975236 | 0.02059027 | 0.07667204 | 0.06555886 | 3.88166506 | 1.95667564 |
| ZNF827      | 0.035277   | 0.04012171 | 0.13672889 | 0.08948125 | 3.875865   | 1.95451832 |
| FBLN5       | 0.03794677 | 0.06475721 | 0.14702096 | 0.13906452 | 3.8743999  | 1.95397287 |
| TMEM204     | 0.24178306 | 0.30375264 | 0.93564647 | 0.66402468 | 3.86977671 | 1.95225033 |
| LAX1        | 0.25783866 | 0.18250264 | 0.99245159 | 0.6560089  | 3.84911859 | 1.94452812 |
| ACAP1       | 1.34898719 | 0.5830828  | 5.18728771 | 3.31569001 | 3.84532023 | 1.94310375 |
| TMEM156     | 0.10881392 | 0.11210414 | 0.41840614 | 0.34502073 | 3.84515286 | 1.94304095 |
| ZEB1-AS1    | 0.03955245 | 0.04680333 | 0.15194255 | 0.16820219 | 3.84154603 | 1.94168704 |
| NCALD       | 0.07039886 | 0.06207058 | 0.27039708 | 0.23601208 | 3.84092964 | 1.94145554 |
| PLEKHG5     | 0.01002634 | 0.0087697  | 0.03844028 | 0.03810687 | 3.83393033 | 1.93882412 |
| SGSM1       | 0.0080694  | 0.01014025 | 0.03078894 | 0.03153057 | 3.81551791 | 1.9318789  |
| NCAM1       | 0.04574549 | 0.02904994 | 0.17292115 | 0.19548057 | 3.78007022 | 1.91841304 |
| APOBEC3A    | 0.65706461 | 0.52206146 | 2.48011415 | 4.03350466 | 3.77453617 | 1.91629937 |
| EPHA1       | 0.11120461 | 0.09984035 | 0.41800249 | 0.32008489 | 3.75885935 | 1.91029493 |
| LTA         | 0.31520489 | 0.1552036  | 1.18449292 | 0.71371209 | 3.75785076 | 1.90990777 |

|            |            |            |            |            |            |            |
|------------|------------|------------|------------|------------|------------|------------|
| COL5A1     | 0.01602289 | 0.01569624 | 0.06019929 | 0.05394422 | 3.75708064 | 1.90961208 |
| FAM101B    | 0.58628259 | 0.26114908 | 2.20210888 | 1.39618189 | 3.75605366 | 1.90921767 |
| CXCR2P1    | 0.06542406 | 0.07573636 | 0.2443209  | 0.2462577  | 3.73441983 | 1.90088413 |
| SSTR3      | 0.00612415 | 0.01486541 | 0.02280727 | 0.03270809 | 3.72415249 | 1.89691215 |
| CYP4F22    | 0.08551523 | 0.08620908 | 0.31817293 | 0.30525505 | 3.72065798 | 1.89555778 |
| ELOVL6     | 0.09385708 | 0.06607996 | 0.348751   | 0.26335227 | 3.71576647 | 1.89365983 |
| LOC154761  | 0.0185711  | 0.02904502 | 0.06895376 | 0.08153508 | 3.71296073 | 1.89257006 |
| TUBA4A     | 0.84189041 | 0.35620018 | 3.10125998 | 2.03166611 | 3.68368609 | 1.88115012 |
| NSG1       | 0.06856452 | 0.05758959 | 0.25247101 | 0.19762139 | 3.68224014 | 1.88058371 |
| CD3G       | 1.12502096 | 0.53067352 | 4.08665833 | 2.64659209 | 3.6325175  | 1.86096975 |
| DBH-AS1    | 0.07050975 | 0.12656521 | 0.25529764 | 0.3061545  | 3.62074241 | 1.85628554 |
| DBN1       | 0.11470086 | 0.06779829 | 0.41482816 | 0.31516499 | 3.61660908 | 1.85463766 |
| FAM46C     | 0.29507411 | 0.15556224 | 1.06068523 | 0.97866591 | 3.59464009 | 1.84584733 |
| N4BP3      | 0.01825153 | 0.02127704 | 0.06556282 | 0.04748349 | 3.59218231 | 1.84486057 |
| PDE4D      | 0.11808432 | 0.07293656 | 0.4226314  | 0.66603932 | 3.57906469 | 1.83958262 |
| LINC00925  | 0.01584895 | 0.02071602 | 0.05667167 | 0.05987595 | 3.57573707 | 1.83824066 |
| ISG20      | 1.866629   | 1.17269357 | 6.66338167 | 5.93846024 | 3.56974078 | 1.83581932 |
| PPP2R2B    | 0.14884785 | 0.11453296 | 0.52991096 | 0.39995987 | 3.56008479 | 1.83191116 |
| C12orf75   | 0.46229674 | 0.27648179 | 1.64426444 | 1.32832964 | 3.55672949 | 1.83055125 |
| FCRLA      | 0.0352016  | 0.05487839 | 0.12512878 | 0.16810151 | 3.55463341 | 1.82970078 |
| CDCA7      | 0.21435516 | 0.17090411 | 0.76043616 | 0.63873375 | 3.54755233 | 1.82682397 |
| WNT10A     | 0.05409377 | 0.06229101 | 0.19160545 | 0.20649424 | 3.5420983  | 1.82460425 |
| PDZD4      | 0.05012555 | 0.07477157 | 0.176822   | 0.17375903 | 3.527582   | 1.81867962 |
| PLCH2      | 0.06346079 | 0.05790378 | 0.22355141 | 0.15417743 | 3.52267002 | 1.81666934 |
| KLRC4      | 0.19522675 | 0.27197722 | 0.6846136  | 0.69918703 | 3.50676126 | 1.81013922 |
| SIRPG      | 0.2086567  | 0.15316721 | 0.72661699 | 0.89227475 | 3.48235631 | 1.80006383 |
| SLC38A5    | 0.11492494 | 0.13405296 | 0.3990764  | 0.35927384 | 3.4724959  | 1.79597299 |
| TESPA1     | 0.25051416 | 0.13264487 | 0.86921433 | 0.40980617 | 3.46972133 | 1.7948198  |
| ADAM23     | 0.00527302 | 0.00979829 | 0.01826997 | 0.02941756 | 3.46480209 | 1.79277295 |
| JAK3       | 0.69772626 | 0.36755739 | 2.41687125 | 1.4001124  | 3.46392474 | 1.79240759 |
| HIP1R      | 0.12738629 | 0.07866755 | 0.44101966 | 0.30889946 | 3.46206526 | 1.79163292 |
| PRKCQ      | 0.52660696 | 0.25327567 | 1.81582935 | 1.27471553 | 3.44816819 | 1.78583015 |
| CSGALNACT1 | 0.17515043 | 0.10494953 | 0.60369735 | 0.37934846 | 3.44673636 | 1.78523095 |
| PLEKHF1    | 0.35607182 | 0.18434126 | 1.22431929 | 1.03178791 | 3.43840552 | 1.7817397  |
| TIGIT      | 0.2425286  | 0.1521917  | 0.83356488 | 0.61042886 | 3.43697558 | 1.7811396  |
| CARD11     | 0.6564327  | 0.35796657 | 2.25172723 | 1.41466823 | 3.4302484  | 1.77831305 |
| EMB        | 1.08584793 | 0.49483109 | 3.72404333 | 2.69849918 | 3.42961776 | 1.77804779 |
| CRISPLD2   | 0.03825405 | 0.05854881 | 0.13103178 | 0.28357273 | 3.42530496 | 1.77623244 |
| CCR4       | 0.60698852 | 0.34617919 | 2.07664375 | 1.05036075 | 3.4212241  | 1.77451261 |
| GFI1       | 0.38896349 | 0.41205902 | 1.32843596 | 0.85300369 | 3.41532299 | 1.77202202 |
| XCL2       | 0.713578   | 0.61616544 | 2.43478192 | 1.95989109 | 3.41207537 | 1.77064951 |
| SMAD3      | 0.20074063 | 0.08746222 | 0.68128667 | 0.37155935 | 3.39386541 | 1.76292935 |
| CD7        | 1.10361348 | 0.56399661 | 3.7423971  | 3.25572625 | 3.39103968 | 1.76172767 |
| COL6A4P2   | 0.00175612 | 0.00274313 | 0.00594549 | 0.01029755 | 3.38557858 | 1.75940241 |
| SH2D3A     | 0.13617628 | 0.0892588  | 0.45811055 | 0.30804702 | 3.36409952 | 1.75022038 |
| SETBP1     | 0.03674734 | 0.03181047 | 0.12355491 | 0.10742386 | 3.36228163 | 1.74944057 |
| DLL1       | 0.08283427 | 0.05916283 | 0.27844877 | 0.18669006 | 3.36151666 | 1.7491123  |
| CST7       | 2.28043367 | 1.17936918 | 7.65867083 | 7.27650929 | 3.35842737 | 1.74778583 |
| CLEC4C     | 0.03409192 | 0.05961784 | 0.11403395 | 0.18263081 | 3.3448964  | 1.74196153 |
| CLU        | 1.09491427 | 0.92675546 | 3.6545465  | 3.38636348 | 3.33774671 | 1.73887448 |
| APBB1      | 0.32263382 | 0.18307457 | 1.07183629 | 0.63741    | 3.32214493 | 1.73211501 |
| LINC00649  | 0.0227895  | 0.02575476 | 0.07554683 | 0.09365628 | 3.3149846  | 1.72900217 |

|             |            |            |            |            |            |            |
|-------------|------------|------------|------------|------------|------------|------------|
| PBX4        | 0.15977052 | 0.12556177 | 0.52886279 | 0.34955408 | 3.31014012 | 1.72689229 |
| SPON1       | 0.01208359 | 0.0184528  | 0.03973529 | 0.04243113 | 3.28836879 | 1.71737211 |
| TNFRSF18    | 0.26506475 | 0.23208728 | 0.87031052 | 0.58463104 | 3.28338839 | 1.71518542 |
| SLC4A10     | 0.02437996 | 0.03711274 | 0.0795673  | 0.08354728 | 3.26363592 | 1.70648012 |
| ANXA6       | 3.74399111 | 1.79979527 | 12.1962044 | 6.89605146 | 3.25754095 | 1.70378332 |
| LOC643733   | 0.21554969 | 0.25770032 | 0.70013593 | 0.61219602 | 3.24814168 | 1.69961456 |
| MSC         | 0.18619846 | 0.21367148 | 0.60470423 | 0.65413272 | 3.24763277 | 1.69938851 |
| ENO2        | 0.302308   | 0.1907086  | 0.98161396 | 0.51480344 | 3.24706581 | 1.69913662 |
| CCDC136     | 0.03855024 | 0.06067318 | 0.12421803 | 0.09573765 | 3.22223738 | 1.68806278 |
| SLC25A23    | 0.10847643 | 0.07946255 | 0.34900248 | 0.25282204 | 3.21731155 | 1.68585565 |
| SERPINE2    | 0.02958031 | 0.06722064 | 0.09513234 | 0.13720849 | 3.21606968 | 1.68529866 |
| CD28        | 0.23378288 | 0.12680279 | 0.74945715 | 0.46381742 | 3.20578282 | 1.68067669 |
| CCNJL       | 0.01485978 | 0.02718041 | 0.0475414  | 0.12233343 | 3.1993343  | 1.67777175 |
| CHRM3-AS2   | 0.23272512 | 0.29856693 | 0.74013667 | 0.64898398 | 3.18030414 | 1.66916474 |
| SEPT9       | 0.12800506 | 0.11301859 | 0.40617917 | 0.47943086 | 3.17314926 | 1.66591538 |
| CLIC3       | 0.18823982 | 0.23398278 | 0.59693712 | 0.70790804 | 3.17115224 | 1.66500714 |
| TJP3        | 0.09571566 | 0.09480448 | 0.3026382  | 0.44777852 | 3.16184635 | 1.66076726 |
| CACNA1H     | 0.01498041 | 0.02302935 | 0.04716175 | 0.0520087  | 3.14822809 | 1.65454007 |
| BCAS4       | 0.08345412 | 0.13836059 | 0.26179572 | 0.27285456 | 3.13700179 | 1.64938635 |
| DYSF        | 0.70017288 | 0.62529777 | 2.19546688 | 2.55538791 | 3.13560686 | 1.64874468 |
| LOC10050680 | 0.01938578 | 0.03440713 | 0.06065965 | 0.07801671 | 3.1290802  | 1.64573864 |
| NKD1        | 0.02858302 | 0.03006352 | 0.08918835 | 0.06225418 | 3.120326   | 1.64169676 |
| TCF7        | 0.47212193 | 0.33774568 | 1.47194321 | 0.99863797 | 3.11771839 | 1.64049062 |
| NAP1L2      | 0.0266317  | 0.04190043 | 0.08298388 | 0.07431015 | 3.11598079 | 1.63968634 |
| CD79B       | 0.23740863 | 0.33010865 | 0.73845196 | 0.76584044 | 3.11046801 | 1.63713167 |
| CCDC88C     | 0.5276047  | 0.21687007 | 1.64007725 | 0.78175162 | 3.10853417 | 1.63623444 |
| LOC10013087 | 0.02706225 | 0.02603038 | 0.08397626 | 0.08777153 | 3.10307774 | 1.63369984 |
| WDR86       | 0.02587772 | 0.04953343 | 0.08016863 | 0.07873316 | 3.09797947 | 1.63132758 |
| CD200R1     | 0.3662234  | 0.26050024 | 1.12816997 | 0.8150055  | 3.08055131 | 1.62318857 |
| DFNB31      | 0.11525613 | 0.10296687 | 0.35482446 | 0.27885896 | 3.07857341 | 1.62226197 |
| AUTS2       | 0.12932723 | 0.06927612 | 0.39494606 | 0.43444949 | 3.05385074 | 1.61062955 |
| PCBP4       | 0.27185367 | 0.18231589 | 0.82352754 | 0.55373147 | 3.02930442 | 1.59898657 |
| TSPAN18     | 0.07274613 | 0.10451338 | 0.21930032 | 0.14325373 | 3.01459749 | 1.59196539 |
| HEATR9      | 0.03792178 | 0.07670678 | 0.11416291 | 0.12511652 | 3.01048408 | 1.58999549 |
| MCTP2       | 0.07672615 | 0.05903166 | 0.23085391 | 0.29289462 | 3.00880373 | 1.58919    |
| FOXP3       | 0.31953312 | 0.26422338 | 0.96093842 | 0.57223694 | 3.00732025 | 1.58847851 |
| POU6F1      | 0.04881531 | 0.04412649 | 0.14674259 | 0.09805973 | 3.00607741 | 1.58788216 |
| HPCAL4      | 0.03609313 | 0.04837016 | 0.10817677 | 0.09968698 | 2.99715655 | 1.58359444 |
| MIR4697HG   | 0.01579697 | 0.03170966 | 0.04717483 | 0.05390425 | 2.98632124 | 1.57836936 |
| FAM102A     | 1.76773444 | 0.44226258 | 5.27488833 | 2.7079443  | 2.98398232 | 1.57723899 |
| FCRL3       | 0.06228304 | 0.10141139 | 0.18546046 | 0.21613692 | 2.97770398 | 1.57420034 |
| TENM1       | 0.00722396 | 0.00673581 | 0.02149217 | 0.0342498  | 2.97512193 | 1.5729488  |
| CERS4       | 0.22996662 | 0.15053462 | 0.6841234  | 0.61692933 | 2.97488131 | 1.57283211 |
| HAPLN3      | 0.41689785 | 0.26330677 | 1.23991555 | 0.8354498  | 2.97414716 | 1.57247603 |
| EBF4        | 0.0405322  | 0.04630123 | 0.11989052 | 0.10302997 | 2.95790784 | 1.5645771  |
| PTPN7       | 1.3222127  | 0.64319913 | 3.87884167 | 2.41586074 | 2.93359885 | 1.55267161 |
| SDR42E1     | 0.02456963 | 0.04252015 | 0.07182567 | 0.07936132 | 2.92335179 | 1.54762345 |
| S1PR1       | 0.38294896 | 0.29714371 | 1.11935417 | 0.57828583 | 2.9229853  | 1.54744257 |
| TMEM40      | 0.02449595 | 0.05287435 | 0.0714256  | 0.11800835 | 2.91581283 | 1.54389812 |
| TSHZ2       | 0.01228961 | 0.01172347 | 0.0357615  | 0.03222828 | 2.90989796 | 1.54096857 |
| LPAL2       | 0.03747358 | 0.04815782 | 0.10864591 | 0.10460434 | 2.89926708 | 1.53568824 |
| PTPRS       | 0.02868709 | 0.01873398 | 0.08310196 | 0.10877979 | 2.89684205 | 1.53448102 |

|           |            |            |            |            |            |            |
|-----------|------------|------------|------------|------------|------------|------------|
| TNS4      | 0.01695509 | 0.0229679  | 0.04903551 | 0.06084209 | 2.89208223 | 1.53210857 |
| SYTL2     | 0.44735774 | 0.26560362 | 1.29333119 | 0.82006339 | 2.89104462 | 1.53159087 |
| CCDC102A  | 0.04052384 | 0.04464346 | 0.11700054 | 0.10259358 | 2.88720295 | 1.52967252 |
| IL21R     | 0.38041284 | 0.19740585 | 1.09774415 | 0.88564273 | 2.88566532 | 1.52890399 |
| NMUR1     | 0.03092917 | 0.03825942 | 0.08911689 | 0.12816369 | 2.88132215 | 1.52673097 |
| EMBP1     | 0.03787995 | 0.02956801 | 0.1090752  | 0.07687148 | 2.87949691 | 1.52581678 |
| INADL     | 0.08247741 | 0.09822928 | 0.2368248  | 0.14809127 | 2.87138986 | 1.52174923 |
| KIAA1671  | 0.15846637 | 0.08260365 | 0.45287506 | 0.35180523 | 2.85786219 | 1.51493635 |
| LOC400685 | 0.01601684 | 0.03468352 | 0.04564853 | 0.05678711 | 2.85003236 | 1.5109783  |
| LIMD2     | 1.11695178 | 0.66457705 | 3.17070688 | 2.02041784 | 2.8387142  | 1.50523761 |
| NFATC2    | 0.89360696 | 0.71163934 | 2.53301271 | 1.7592797  | 2.83459375 | 1.50314198 |
| CD244     | 0.42179933 | 0.34093589 | 1.19550621 | 0.89096596 | 2.8343009  | 1.50299293 |
| BAIAP3    | 0.11669527 | 0.11172962 | 0.33073068 | 0.39949913 | 2.83413954 | 1.50291079 |
| ITGB2-AS1 | 0.44902764 | 0.32027569 | 1.27082086 | 0.79455693 | 2.83016174 | 1.50088451 |
| CD27      | 0.65682685 | 0.37437332 | 1.84239256 | 2.4366357  | 2.80498971 | 1.48799548 |
| CLUHP3    | 0.30921703 | 0.26702114 | 0.86414894 | 0.54293181 | 2.79463569 | 1.48266023 |
| PTPRN2    | 0.08893891 | 0.09556735 | 0.2484239  | 0.21261572 | 2.79319719 | 1.48191742 |
| PRDM8     | 0.1654406  | 0.10564567 | 0.46148731 | 0.62924146 | 2.7894442  | 1.47997769 |
| CCDC64    | 0.39067394 | 0.16362745 | 1.08816244 | 0.60574746 | 2.7853469  | 1.47785702 |
| CPNE5     | 0.04299756 | 0.06352657 | 0.11952232 | 0.13678794 | 2.77974661 | 1.47495338 |
| ZNF80     | 0.04644322 | 0.08391626 | 0.12753625 | 0.15306381 | 2.7460684  | 1.45736756 |
| DMPK      | 0.16936178 | 0.10917803 | 0.4640576  | 0.34048649 | 2.74003738 | 1.45419558 |
| RTKN2     | 0.03881399 | 0.0346793  | 0.10633191 | 0.0799435  | 2.73952556 | 1.45392606 |
| CD48      | 10.0695819 | 3.84124875 | 27.4768915 | 17.31014   | 2.72870233 | 1.44821502 |
| DMTN      | 0.28427616 | 0.18313198 | 0.77563695 | 0.54535276 | 2.72846284 | 1.44808839 |
| DTHD1     | 0.12415864 | 0.11688699 | 0.33674395 | 0.36170743 | 2.71220721 | 1.4394674  |
| EEF1A2    | 0.03704965 | 0.06220734 | 0.10034144 | 0.13988339 | 2.70829648 | 1.43738568 |
| LINC00954 | 0.03240364 | 0.03669973 | 0.08771149 | 0.0943681  | 2.706841   | 1.43661015 |
| ASB2      | 0.20090225 | 0.1515951  | 0.54357663 | 0.44820528 | 2.70567721 | 1.43598973 |
| CASS4     | 0.53870174 | 0.36720352 | 1.4536521  | 1.17236927 | 2.69843588 | 1.43212341 |
| C12orf79  | 0.0284329  | 0.05392332 | 0.07665396 | 0.0746472  | 2.69595983 | 1.430799   |
| SPNS3     | 0.06932108 | 0.08487194 | 0.18645627 | 0.18643561 | 2.68974859 | 1.42747133 |
| SLC43A1   | 0.11767332 | 0.11935343 | 0.31582566 | 0.21857969 | 2.68391898 | 1.42434112 |
| CACNA1I   | 0.01600327 | 0.02297395 | 0.04282316 | 0.03103809 | 2.67590098 | 1.42002473 |
| TOX       | 0.15306841 | 0.10636992 | 0.40889573 | 0.27025189 | 2.67132669 | 1.41755642 |
| SLC35F2   | 0.11384937 | 0.08267288 | 0.30373742 | 0.21472384 | 2.66788839 | 1.41569831 |
| ADGRG1    | 0.17166716 | 0.16151968 | 0.45729878 | 0.45881996 | 2.66386881 | 1.41352303 |
| NAP1L3    | 0.0153954  | 0.0291954  | 0.04088805 | 0.04407974 | 2.65586183 | 1.40918009 |
| SLAIN1    | 0.15947497 | 0.10400403 | 0.4223444  | 0.32867344 | 2.6483429  | 1.40508993 |
| ARL4C     | 2.08156267 | 1.12657569 | 5.50154875 | 2.95371009 | 2.64298973 | 1.40217082 |
| FXVD2     | 0.54848679 | 0.71750356 | 1.44953277 | 1.70215054 | 2.64278518 | 1.40205916 |
| IL5RA     | 0.08924663 | 0.0921949  | 0.23532822 | 0.2352464  | 2.63683031 | 1.39880473 |
| CLC       | 0.55131416 | 0.567989   | 1.45036188 | 1.61712584 | 2.63073577 | 1.39546635 |
| CD5       | 2.18610974 | 0.88931408 | 5.74735604 | 3.15276346 | 2.62903364 | 1.3945326  |
| GDF11     | 0.10614937 | 0.06567631 | 0.27801392 | 0.21297156 | 2.6190822  | 1.38906134 |
| RAB33A    | 0.18234482 | 0.15993335 | 0.47720243 | 0.49781925 | 2.61703316 | 1.38793221 |
| RASGRF2   | 0.03461962 | 0.03590781 | 0.09058101 | 0.07474551 | 2.61646432 | 1.38761858 |
| IRS1      | 0.0110539  | 0.01571836 | 0.0288943  | 0.02842126 | 2.61394655 | 1.38622964 |
| FLT4      | 0.01025574 | 0.01416707 | 0.02678337 | 0.03144409 | 2.6115505  | 1.3849066  |
| TRIB2     | 0.75906563 | 0.37110423 | 1.97890321 | 0.99784246 | 2.60702518 | 1.38240452 |
| OLFM2     | 0.092578   | 0.10394329 | 0.24013393 | 0.35349954 | 2.59385533 | 1.37509802 |
| SLC37A3   | 0.14111793 | 0.10593579 | 0.36536265 | 0.16095365 | 2.58905907 | 1.37242788 |

|             |            |            |            |            |            |            |
|-------------|------------|------------|------------|------------|------------|------------|
| SYNM        | 0.07949752 | 0.07264728 | 0.2054519  | 0.21094145 | 2.58438137 | 1.36981898 |
| DLG3        | 0.15220213 | 0.12903765 | 0.39227391 | 0.28401094 | 2.57732214 | 1.36587287 |
| GPER1       | 0.04216921 | 0.04194256 | 0.10847762 | 0.16125591 | 2.57243665 | 1.36313555 |
| ADAM8       | 1.27337619 | 0.55409827 | 3.26426463 | 2.7386001  | 2.56347234 | 1.35809933 |
| CDK6        | 0.29013412 | 0.13922668 | 0.74346396 | 0.34120949 | 2.5624837  | 1.35754283 |
| AXIN2       | 0.03722795 | 0.05145149 | 0.09436225 | 0.0781392  | 2.53471532 | 1.34182372 |
| C1orf186    | 0.05254334 | 0.08944489 | 0.13298466 | 0.1322741  | 2.53095154 | 1.33967988 |
| ADGRG5      | 0.15959363 | 0.11782115 | 0.40353297 | 0.29234543 | 2.52850304 | 1.33828352 |
| NCR3        | 0.44820557 | 0.30617448 | 1.12458202 | 0.86344911 | 2.5090764  | 1.3271564  |
| FCMR        | 0.5243616  | 0.38648909 | 1.31355013 | 1.18401346 | 2.50504637 | 1.32483731 |
| SLC23A3     | 0.04942102 | 0.05654743 | 0.12352119 | 0.11302752 | 2.49936579 | 1.32156206 |
| CMKLR1      | 1.02478519 | 0.70876937 | 2.56000673 | 2.44755617 | 2.49809108 | 1.32082608 |
| KLRG1       | 0.23764299 | 0.16799946 | 0.59297505 | 0.54892094 | 2.49523482 | 1.31917559 |
| CD6         | 3.3172     | 1.07449443 | 8.27146063 | 5.05490091 | 2.49350676 | 1.31817611 |
| HOOK1       | 0.03459511 | 0.03879681 | 0.08625781 | 0.0705635  | 2.49335258 | 1.31808691 |
| FBXL16      | 0.10862906 | 0.07745607 | 0.27002811 | 0.17313242 | 2.48578161 | 1.31369955 |
| P2RX5       | 0.24033473 | 0.20385588 | 0.59731431 | 0.46899009 | 2.48534331 | 1.31344515 |
| PXN         | 1.2549357  | 0.50862723 | 3.11516121 | 1.7702958  | 2.48232734 | 1.31169337 |
| FAM160A1    | 0.01028061 | 0.02737308 | 0.02548551 | 0.03066236 | 2.47898913 | 1.30975195 |
| TTC16       | 0.12306715 | 0.08648881 | 0.30436677 | 0.34589133 | 2.47317639 | 1.30636514 |
| CCR7        | 1.02770485 | 0.64715393 | 2.53652283 | 2.08609066 | 2.46814329 | 1.30342615 |
| CCDC65      | 0.22610662 | 0.17899629 | 0.55757829 | 0.42512887 | 2.46599717 | 1.30217114 |
| ANKRD33B    | 0.05146706 | 0.03508368 | 0.12643279 | 0.11079024 | 2.45657682 | 1.29664935 |
| LTK         | 0.05867726 | 0.05259314 | 0.14377786 | 0.1415795  | 2.45031653 | 1.29296813 |
| SLC9A9      | 0.21018932 | 0.11321564 | 0.51495419 | 0.30422952 | 2.44995413 | 1.29275474 |
| PLXNA4      | 0.01467942 | 0.01490197 | 0.03586052 | 0.0386018  | 2.4429119  | 1.28860183 |
| NINL        | 0.04435845 | 0.04025859 | 0.10832955 | 0.08059538 | 2.44213993 | 1.28814587 |
| CMTM8       | 0.07948395 | 0.09580193 | 0.19356136 | 0.18769916 | 2.43522579 | 1.28405554 |
| SERPINB9P1  | 0.19091561 | 0.23352432 | 0.46254853 | 0.45823487 | 2.42279056 | 1.2766697  |
| GAMT        | 0.12184117 | 0.14526363 | 0.29295311 | 0.29651219 | 2.40438514 | 1.26566801 |
| NTNG2       | 0.06368392 | 0.04816471 | 0.15293038 | 0.14008051 | 2.40139734 | 1.26387413 |
| TTC9        | 0.10780293 | 0.07257221 | 0.25855078 | 0.14828959 | 2.39836503 | 1.26205125 |
| SLC4A4      | 0.0148127  | 0.02048243 | 0.03544323 | 0.04352531 | 2.3927598  | 1.25867558 |
| LOC10192924 | 0.05116596 | 0.10058345 | 0.12214369 | 0.15436688 | 2.3872063  | 1.25532325 |
| ANK3        | 0.11969637 | 0.06873071 | 0.28561401 | 0.15182092 | 2.38615421 | 1.25468728 |
| HKDC1       | 0.01280623 | 0.02077655 | 0.03055337 | 0.05623827 | 2.38582174 | 1.25448625 |
| FAM167A     | 0.03100621 | 0.03743461 | 0.07381443 | 0.062495   | 2.38063372 | 1.25134567 |
| PVRIG       | 0.26986977 | 0.14242581 | 0.64199938 | 0.61675957 | 2.37892286 | 1.25030849 |
| SLAMF6      | 1.59495167 | 0.69150016 | 3.78577671 | 2.08591924 | 2.37359964 | 1.24707662 |
| LOC10192815 | 0.03577543 | 0.03720442 | 0.08482202 | 0.07163632 | 2.37095741 | 1.24546975 |
| EGLN3       | 0.06528754 | 0.08615536 | 0.15453955 | 0.12530595 | 2.36706053 | 1.2430966  |
| GAREML      | 0.02614336 | 0.02668419 | 0.06178742 | 0.07017852 | 2.36340815 | 1.2408688  |
| REM2        | 0.05351363 | 0.04824688 | 0.12645042 | 0.1260638  | 2.36295728 | 1.24059355 |
| SLC40A1     | 0.7803033  | 0.76961815 | 1.84092521 | 2.20351421 | 2.35924315 | 1.23832412 |
| EIF4E3      | 0.50327456 | 0.24733865 | 1.18714065 | 0.63659699 | 2.35883303 | 1.2380733  |
| PHLDB2      | 0.02675157 | 0.08215181 | 0.06302245 | 0.09256898 | 2.35584087 | 1.23624209 |
| TRERF1      | 0.39752246 | 0.35084648 | 0.93485998 | 0.61696315 | 2.35171613 | 1.23371393 |
| PRR7        | 0.08845519 | 0.10556503 | 0.20799188 | 0.26769509 | 2.3513813  | 1.23350851 |
| WDR86-AS1   | 0.6601319  | 0.70099489 | 1.55143085 | 1.28452069 | 2.35018314 | 1.23277319 |
| CD3D        | 4.93680807 | 2.98757235 | 11.5795185 | 7.15250205 | 2.34554764 | 1.22992481 |
| RRAS2       | 0.20817288 | 0.11272004 | 0.48648627 | 0.27011663 | 2.33693398 | 1.22461698 |
| RNF207      | 0.06006301 | 0.05801897 | 0.1397065  | 0.09014941 | 2.32599915 | 1.21785057 |

|            |            |            |            |            |            |            |
|------------|------------|------------|------------|------------|------------|------------|
| MAP3K7CL   | 3.24311204 | 2.11248428 | 7.51635383 | 5.28792365 | 2.31763619 | 1.21265412 |
| SPON2      | 0.16122742 | 0.1460998  | 0.37319683 | 0.38053102 | 2.31472316 | 1.21083966 |
| LTB        | 4.17285    | 1.57967202 | 9.64055729 | 6.11917292 | 2.31030526 | 1.20808349 |
| SYNE1      | 0.3747044  | 0.12112065 | 0.86534281 | 0.38762724 | 2.30940126 | 1.20751886 |
| TESC       | 0.37891292 | 0.35430374 | 0.8678816  | 0.62681075 | 2.29045132 | 1.1956319  |
| FBLN7      | 0.07350078 | 0.082288   | 0.1677041  | 0.18565628 | 2.28166435 | 1.19008657 |
| ATP2A3     | 1.68001111 | 0.75384891 | 3.82609479 | 2.14859819 | 2.27742231 | 1.18740184 |
| GPR132     | 0.65888526 | 0.36680859 | 1.49994475 | 0.94918886 | 2.27648855 | 1.18681021 |
| GCH1       | 2.27851026 | 0.82284988 | 5.17747875 | 3.2508429  | 2.27230873 | 1.18415886 |
| MBOAT2     | 0.04959634 | 0.03746227 | 0.11259    | 0.10424198 | 2.27012707 | 1.18277306 |
| RAB37      | 0.62100096 | 0.27705658 | 1.40697473 | 0.94205255 | 2.26565628 | 1.17992901 |
| SLC25A53   | 0.03372933 | 0.02594971 | 0.07622123 | 0.05135747 | 2.25979101 | 1.17618936 |
| GUCY1A3    | 0.02861054 | 0.04892251 | 0.06452429 | 0.07650182 | 2.25526293 | 1.17329564 |
| TLR10      | 0.1335073  | 0.09424081 | 0.30074587 | 0.17296852 | 2.25265477 | 1.17162623 |
| GNG7       | 0.05743702 | 0.04023967 | 0.12926389 | 0.11466008 | 2.25053285 | 1.17026662 |
| KLRC2      | 0.14823007 | 0.35744184 | 0.33208037 | 0.35260023 | 2.24030359 | 1.16369425 |
| RASSF2     | 1.78959763 | 1.11326779 | 4.00156271 | 2.82743745 | 2.23601252 | 1.16092827 |
| ST6GAL1    | 1.9373343  | 0.72018613 | 4.32762896 | 1.91573492 | 2.23380599 | 1.15950389 |
| ISM1       | 0.01132024 | 0.0283459  | 0.02523107 | 0.04515151 | 2.22884457 | 1.15629602 |
| FAM95C     | 0.02275434 | 0.04311358 | 0.05041153 | 0.06356438 | 2.21546871 | 1.14761195 |
| CORO1A     | 10.6809904 | 4.76493113 | 23.6603167 | 12.3533048 | 2.21518004 | 1.14742396 |
| SELL       | 1.74481763 | 1.02143751 | 3.86401771 | 4.7732997  | 2.21456824 | 1.14702545 |
| ARID5B     | 0.52428189 | 0.46870356 | 1.1607021  | 0.79570713 | 2.21388938 | 1.14658314 |
| SCN1B      | 0.09200811 | 0.12261822 | 0.20368487 | 0.33537118 | 2.21377092 | 1.14650594 |
| DPY19L2P2  | 0.04966863 | 0.05995146 | 0.10966549 | 0.08546187 | 2.20794254 | 1.14270263 |
| MSRB3      | 0.01464345 | 0.02535769 | 0.0322609  | 0.03644478 | 2.20309495 | 1.13953167 |
| SBK1       | 0.09616281 | 0.05960629 | 0.21070073 | 0.11089411 | 2.19108332 | 1.13164435 |
| GIMAP7     | 2.63688196 | 0.90376375 | 5.77656229 | 2.95729633 | 2.19067913 | 1.13137819 |
| LRFN3      | 0.17678677 | 0.14347375 | 0.38669703 | 0.27609418 | 2.18736409 | 1.12919338 |
| CD200      | 0.03478999 | 0.03849137 | 0.07601902 | 0.08090631 | 2.18508304 | 1.12768811 |
| TRAF1      | 1.69899693 | 0.40737963 | 3.7115525  | 1.75356728 | 2.18455516 | 1.12733953 |
| SRGAP3     | 0.09801271 | 0.06245456 | 0.2140021  | 0.14757535 | 2.18341172 | 1.1265842  |
| FZD3       | 0.00926705 | 0.00920008 | 0.02021252 | 0.0182394  | 2.18111725 | 1.12506733 |
| SULF2      | 0.55021093 | 0.4299658  | 1.19550113 | 1.31266647 | 2.17280514 | 1.11955879 |
| BIK        | 0.24496181 | 0.23458865 | 0.52696322 | 0.40921498 | 2.1512056  | 1.10514541 |
| HDC        | 0.06795253 | 0.08221898 | 0.14578279 | 0.17184661 | 2.14536207 | 1.10122115 |
| OSBPL7     | 0.2249644  | 0.12248101 | 0.48121007 | 0.27118854 | 2.13904984 | 1.0969701  |
| PAX5       | 0.04729766 | 0.03777696 | 0.10115362 | 0.07338818 | 2.13865988 | 1.09670707 |
| SERPINB9   | 1.22540437 | 0.50931493 | 2.61848248 | 1.83467205 | 2.13683135 | 1.09547305 |
| IGSF9B     | 0.02417809 | 0.03190372 | 0.05138438 | 0.04335854 | 2.12524536 | 1.08762941 |
| PTP4A3     | 0.09033684 | 0.06657297 | 0.19190629 | 0.16523083 | 2.1243415  | 1.08701571 |
| SLC2A1     | 0.6790195  | 0.28720092 | 1.43588871 | 0.77852915 | 2.11465017 | 1.08041902 |
| HLA-DOB    | 0.66276096 | 0.64961629 | 1.39963421 | 0.76847487 | 2.11182355 | 1.0784893  |
| TMEM154    | 0.64894144 | 0.31239566 | 1.35367248 | 1.62617738 | 2.08597015 | 1.06071851 |
| FLT3LG     | 2.72666296 | 1.19057547 | 5.6822975  | 2.69819186 | 2.08397502 | 1.05933798 |
| ALS2CL     | 0.0389801  | 0.06265787 | 0.08095154 | 0.09899364 | 2.07674032 | 1.05432083 |
| EPS8L2     | 0.16520804 | 0.12345878 | 0.34240591 | 0.28783926 | 2.07257415 | 1.05142372 |
| JHDM1D-AS1 | 0.10288134 | 0.09199007 | 0.21314594 | 0.16278214 | 2.07176477 | 1.05086021 |
| LOC729683  | 0.16219821 | 0.12405772 | 0.33589108 | 0.23968832 | 2.07086802 | 1.05023561 |
| OBSCN      | 0.09198895 | 0.02426338 | 0.19013197 | 0.07462494 | 2.06690002 | 1.04746861 |
| AMPD3      | 0.70883607 | 0.34482666 | 1.46270113 | 1.10255952 | 2.06352523 | 1.04511108 |
| LOC374443  | 0.73768693 | 0.37351423 | 1.52218196 | 0.80179757 | 2.06345254 | 1.04506025 |

|           |            |            |            |            |            |            |
|-----------|------------|------------|------------|------------|------------|------------|
| DERL3     | 0.16662125 | 0.13935474 | 0.34294442 | 0.27372106 | 2.05822738 | 1.04140237 |
| MT3       | 0.03969541 | 0.14303172 | 0.08167288 | 0.16905389 | 2.05748933 | 1.04088495 |
| ZNRF1     | 0.32621327 | 0.13982044 | 0.66863813 | 0.36380089 | 2.04969625 | 1.03541013 |
| SPIB      | 0.11474514 | 0.09315168 | 0.23495112 | 0.28188319 | 2.04759099 | 1.03392757 |
| SIDT1     | 0.2058138  | 0.14934203 | 0.42079399 | 0.23617989 | 2.04453731 | 1.03177439 |
| SEMA4C    | 0.12288726 | 0.13713975 | 0.25057691 | 0.18442772 | 2.03907961 | 1.0279181  |
| FYN       | 2.48138667 | 0.92411957 | 5.04960792 | 3.01457292 | 2.03499438 | 1.02502481 |
| CHIC1     | 0.09688618 | 0.03998696 | 0.19689279 | 0.12042017 | 2.03220717 | 1.02304749 |
| CHST2     | 0.17531402 | 0.11941936 | 0.35402625 | 0.38558139 | 2.01938358 | 1.01391497 |
| AFAP1     | 0.2350549  | 0.11828357 | 0.47376075 | 0.21758553 | 2.01553236 | 1.01116095 |
| MYCL      | 0.23346412 | 0.20059441 | 0.46962585 | 0.30715799 | 2.01155469 | 1.00831096 |
| TMEM25    | 0.07570315 | 0.08127828 | 0.15195045 | 0.11776545 | 2.00718797 | 1.00517573 |
| KIAA1324L | 0.04153852 | 0.03408695 | 0.0833259  | 0.08140681 | 2.0059912  | 1.00431528 |
| FAM65B    | 2.02677196 | 1.04937817 | 4.03674396 | 2.38789833 | 1.99171097 | 0.99400831 |
| CXCR5     | 0.09800537 | 0.09479189 | 0.19500579 | 0.20786357 | 1.98974603 | 0.9925843  |
| MARCKSL1  | 0.90755604 | 0.36676721 | 1.80277163 | 1.14761963 | 1.98640255 | 0.99015802 |
| PLCG1     | 2.11556889 | 0.41820909 | 4.20132833 | 1.64331956 | 1.98590949 | 0.98979987 |
| SKAP1     | 2.15774585 | 2.0262624  | 4.28355875 | 2.60774869 | 1.98520078 | 0.98928493 |
| KIAA1324  | 0.1660467  | 0.08589312 | 0.32938974 | 0.37211279 | 1.98371741 | 0.98820652 |
| OXCT1     | 0.27899359 | 0.23130685 | 0.55244079 | 0.35903295 | 1.98012002 | 0.98558788 |
| TRAF5     | 1.14664007 | 0.34388    | 2.26313583 | 0.85638816 | 1.97371074 | 0.98091057 |
| SLC12A3   | 0.01575949 | 0.02737507 | 0.03109861 | 0.03776071 | 1.97332654 | 0.98062971 |
| C1orf21   | 0.06175243 | 0.04720858 | 0.12184676 | 0.0940798  | 1.97314919 | 0.98050004 |
| LRRC4     | 0.13983063 | 0.14529404 | 0.27565647 | 0.2428525  | 1.97135967 | 0.97919101 |
| FRMD3     | 0.27894925 | 0.22874966 | 0.54958507 | 0.39734971 | 1.97019733 | 0.97834014 |
| NLGN2     | 0.04473264 | 0.03722419 | 0.0878735  | 0.06942942 | 1.96441578 | 0.97410031 |
| NPTXR     | 0.07661486 | 0.06891019 | 0.14846388 | 0.08970218 | 1.93779501 | 0.95441597 |
| PRKCB     | 1.10437752 | 0.86901245 | 2.13548967 | 1.31220002 | 1.93365913 | 0.95133349 |
| STMN3     | 0.8831633  | 0.34380194 | 1.70376548 | 0.86419427 | 1.92916246 | 0.94797464 |
| NT5E      | 0.024336   | 0.02631373 | 0.04676439 | 0.05709717 | 1.92161345 | 0.94231816 |
| LGALS2    | 2.6389953  | 1.73510289 | 5.06835788 | 3.80776861 | 1.92056344 | 0.94152962 |
| CDH24     | 0.03371071 | 0.03317382 | 0.06471954 | 0.06733567 | 1.9198511  | 0.94099442 |
| ARHGEF4   | 0.02843881 | 0.0402067  | 0.05457531 | 0.05493719 | 1.91904352 | 0.94038743 |
| LOC389906 | 0.1229071  | 0.09628612 | 0.23485502 | 0.17712509 | 1.91083365 | 0.93420219 |
| PNMA3     | 0.10902036 | 0.08870588 | 0.20789424 | 0.12379587 | 1.90693053 | 0.93125229 |
| TPCN1     | 0.55034852 | 0.29810653 | 1.04904317 | 0.87150862 | 1.90614335 | 0.93065662 |
| RNF157    | 0.37847373 | 0.30972125 | 0.72084567 | 0.51042365 | 1.90461213 | 0.92949723 |
| LOC606724 | 0.52499364 | 0.41537114 | 0.99979036 | 0.7653536  | 1.90438564 | 0.92932566 |
| FAM171A1  | 0.02248932 | 0.0327384  | 0.04274161 | 0.05711674 | 1.90052883 | 0.92640091 |
| GPSM1     | 0.10620743 | 0.08591377 | 0.20125165 | 0.13396379 | 1.89489246 | 0.92211597 |
| PROB1     | 0.04573309 | 0.05528607 | 0.08664323 | 0.06854515 | 1.89454124 | 0.92184854 |
| ZNF853    | 0.0932672  | 0.0760426  | 0.17659931 | 0.17645873 | 1.89347724 | 0.92103808 |
| FAM169A   | 0.07646435 | 0.05289691 | 0.14476502 | 0.10311907 | 1.89323544 | 0.92085383 |
| ADAMTS10  | 0.03563491 | 0.04921477 | 0.06743927 | 0.05977811 | 1.89250583 | 0.92029775 |
| TNFRSF4   | 0.21233202 | 0.16153823 | 0.4016752  | 0.3685457  | 1.89173168 | 0.91970748 |
| TNK1      | 0.07784576 | 0.06905724 | 0.14724074 | 0.12060613 | 1.89144195 | 0.9194865  |
| LSR       | 0.29521377 | 0.27217984 | 0.5573224  | 0.32372322 | 1.88786046 | 0.91675213 |
| TRABD2A   | 0.44342485 | 0.24663038 | 0.83450446 | 0.39490829 | 1.8819524  | 0.91223014 |
| TMEM30B   | 0.04036486 | 0.04352372 | 0.07586792 | 0.08748057 | 1.87955341 | 0.91038991 |
| MTSS1     | 0.32808463 | 0.1772025  | 0.61419783 | 0.39798662 | 1.87207134 | 0.90463542 |
| GPR68     | 0.70282327 | 0.98239401 | 1.31519127 | 0.99373435 | 1.87129729 | 0.90403877 |
| LINC01215 | 0.13923242 | 0.08757691 | 0.26037924 | 0.13769572 | 1.87010498 | 0.90311926 |

|             |            |            |            |            |            |            |
|-------------|------------|------------|------------|------------|------------|------------|
| NLRC5       | 4.76146852 | 1.31855288 | 8.89505604 | 3.19303275 | 1.86813291 | 0.9015971  |
| LRR32       | 0.03202325 | 0.0450615  | 0.05956393 | 0.06477175 | 1.86002139 | 0.89531921 |
| PLCD4       | 0.08234613 | 0.07264844 | 0.15289728 | 0.08315003 | 1.8567634  | 0.89278999 |
| FAM26F      | 7.07932593 | 4.3545269  | 13.0844319 | 8.98940378 | 1.84825957 | 0.88616738 |
| TRAF4       | 0.34813334 | 0.16609747 | 0.64117342 | 0.48480577 | 1.84174663 | 0.8810746  |
| GPR141      | 0.52515405 | 0.57792703 | 0.96376317 | 1.01996119 | 1.83520087 | 0.87593798 |
| PLEKHG1     | 0.08309864 | 0.1352493  | 0.15242122 | 0.09262883 | 1.83422036 | 0.87516697 |
| RNF144A     | 0.06818007 | 0.04803902 | 0.12503103 | 0.08512135 | 1.83383552 | 0.87486424 |
| GALNT3      | 0.26318132 | 0.16420665 | 0.48259412 | 0.31318005 | 1.83369445 | 0.87475326 |
| LIME1       | 2.11385882 | 0.7104974  | 3.8725454  | 1.98708287 | 1.83197921 | 0.87340313 |
| MS4A2       | 0.07186114 | 0.09953619 | 0.13082469 | 0.14462549 | 1.82052066 | 0.86435111 |
| MAP1A       | 0.13769537 | 0.08350321 | 0.25027203 | 0.19769889 | 1.81757765 | 0.862017   |
| GIMAP5      | 2.55884631 | 1.28131007 | 4.63672479 | 2.43963547 | 1.81203724 | 0.8576126  |
| DUSP2       | 1.75593296 | 0.41801842 | 3.16727131 | 2.76863596 | 1.80375412 | 0.85100269 |
| LAMA5       | 0.0284118  | 0.02343844 | 0.05118515 | 0.03791763 | 1.80154515 | 0.84923481 |
| LIPE        | 0.07550747 | 0.08364378 | 0.13592725 | 0.09043872 | 1.80018281 | 0.84814342 |
| CCSER1      | 0.03318468 | 0.03544891 | 0.05957651 | 0.06099323 | 1.79530172 | 0.84422632 |
| ITPR3       | 1.24688859 | 0.58637845 | 2.23807377 | 0.81990947 | 1.79492682 | 0.84392502 |
| CDC14A      | 1.0168307  | 0.33180546 | 1.8249915  | 0.70783526 | 1.79478402 | 0.84381025 |
| STK26       | 0.79197752 | 0.39691355 | 1.41841644 | 0.76309397 | 1.79098068 | 0.84074978 |
| MPP6        | 0.03166178 | 0.02947825 | 0.05664662 | 0.04153364 | 1.78911664 | 0.83924745 |
| RHOF        | 2.67063511 | 1.68783904 | 4.76909833 | 1.87600122 | 1.78575438 | 0.83653366 |
| ZG16B       | 0.92170343 | 0.62226502 | 1.64151552 | 1.20077411 | 1.78095846 | 0.83265387 |
| FAM117A     | 1.25783552 | 0.40335474 | 2.22907046 | 0.90927688 | 1.77214781 | 0.82549894 |
| HCG26       | 0.81353667 | 0.52863605 | 1.43867323 | 0.77273143 | 1.76841842 | 0.82245967 |
| PSD         | 0.10378465 | 0.06810173 | 0.18336729 | 0.12811866 | 1.7668055  | 0.82114323 |
| GSDMB       | 0.60369033 | 0.22787568 | 1.06075956 | 0.68659778 | 1.75712531 | 0.81321708 |
| CHD3        | 2.26193074 | 0.69237553 | 3.97240792 | 1.44872281 | 1.75620228 | 0.81245902 |
| MYBL1       | 0.26544496 | 0.11025873 | 0.4643725  | 0.23247178 | 1.74941161 | 0.80686977 |
| KLF12       | 0.30934174 | 0.1333942  | 0.53945008 | 0.23322613 | 1.74386451 | 0.80228795 |
| GRAP        | 0.60383404 | 0.22629668 | 1.04398767 | 0.50495597 | 1.72893147 | 0.78988068 |
| LOC10099632 | 0.0735707  | 0.1876169  | 0.12673591 | 0.24319553 | 1.72264094 | 0.78462202 |
| PITPNM2     | 0.07961475 | 0.04142928 | 0.13687537 | 0.08244296 | 1.7192213  | 0.78175526 |
| OCIAD2      | 1.9678097  | 1.0743713  | 3.37754302 | 1.90515924 | 1.71639718 | 0.77938343 |
| RARRES3     | 21.4004689 | 9.09805835 | 36.4257229 | 21.0975077 | 1.70209929 | 0.7673152  |
| ISYNA1      | 0.28343587 | 0.15207978 | 0.48100178 | 0.29011811 | 1.69703917 | 0.76301986 |
| ADA         | 1.29641648 | 0.5634959  | 2.19784108 | 1.27787501 | 1.69532023 | 0.76155781 |
| MYLK        | 0.10338628 | 0.13179356 | 0.17478548 | 0.13070259 | 1.69060611 | 0.75754057 |
| IGFBP4      | 0.3564289  | 0.31457627 | 0.60190765 | 0.39680793 | 1.68871729 | 0.75592783 |
| SYNE3       | 0.97506815 | 0.48113258 | 1.63910627 | 0.64020582 | 1.68101714 | 0.74933444 |
| CUBN        | 0.04470296 | 0.02075317 | 0.0750324  | 0.04447798 | 1.6784661  | 0.7471434  |
| LMTK3       | 0.03940919 | 0.03508499 | 0.06588214 | 0.05418806 | 1.67174575 | 0.74135545 |
| GRASP       | 0.33980559 | 0.24345393 | 0.56787162 | 0.51189407 | 1.67116621 | 0.74085522 |
| TSPAN13     | 0.84802594 | 0.9275275  | 1.41607919 | 1.10629666 | 1.66985362 | 0.73972164 |
| AMPH        | 0.02039701 | 0.02449961 | 0.03384589 | 0.03490323 | 1.6593552  | 0.73062275 |
| PATL2       | 0.79448963 | 0.27922977 | 1.31574246 | 0.60199901 | 1.65608513 | 0.72777683 |
| CRACR2A     | 0.65067782 | 0.20697202 | 1.07611017 | 0.55924127 | 1.6538295  | 0.72581051 |
| RUNX3       | 4.13797889 | 2.25725167 | 6.82500125 | 2.99243299 | 1.64935623 | 0.72190303 |
| SYNJ2       | 0.1959212  | 0.16863351 | 0.32291708 | 0.14362005 | 1.64819872 | 0.7208902  |
| LOC606724   | 0.10175519 | 0.14593207 | 0.16671639 | 0.26725219 | 1.63840678 | 0.71229359 |
| HMHA1       | 4.62585407 | 1.20218879 | 7.57656688 | 2.24237935 | 1.63787416 | 0.71182452 |
| FZD6        | 0.09710999 | 0.10502974 | 0.15857204 | 0.12399445 | 1.63291171 | 0.70744678 |

|           |            |            |            |            |            |            |
|-----------|------------|------------|------------|------------|------------|------------|
| CARNS1    | 0.07272736 | 0.06971375 | 0.11872773 | 0.07365743 | 1.63250427 | 0.70708676 |
| RASAL3    | 3.09933037 | 0.70301508 | 5.045105   | 2.02085784 | 1.62780485 | 0.70292775 |
| PLXNC1    | 1.67394578 | 1.10589979 | 2.71634744 | 2.37411373 | 1.62272128 | 0.69841522 |
| GDPD5     | 0.99321552 | 0.39475804 | 1.60443738 | 0.75616104 | 1.61539701 | 0.69188877 |
| RAB15     | 0.17466787 | 0.12388204 | 0.28214762 | 0.14310467 | 1.61533783 | 0.69183592 |
| SPEF2     | 0.31837107 | 0.1771016  | 0.51209721 | 0.31991616 | 1.60849163 | 0.68570843 |
| CERKL     | 0.87138048 | 0.74259418 | 1.40104435 | 0.75702406 | 1.60784455 | 0.68512793 |
| ASAP2     | 0.06669471 | 0.06278007 | 0.1072251  | 0.0767738  | 1.60770018 | 0.68499838 |
| DCANP1    | 0.24031113 | 0.20594567 | 0.38435985 | 0.35135076 | 1.5994259  | 0.67755415 |
| TMEM63C   | 0.06856888 | 0.11470502 | 0.10853512 | 0.14489916 | 1.58286256 | 0.66253599 |
| BCL9L     | 1.33785141 | 0.42240817 | 2.11750792 | 0.75445823 | 1.58276764 | 0.66244948 |
| GCSAM     | 0.27315429 | 0.14723625 | 0.42894081 | 0.23180501 | 1.57032428 | 0.65106252 |
| BZRAP1    | 0.27177237 | 0.09932988 | 0.4250975  | 0.21197822 | 1.56416747 | 0.64539499 |
| CD160     | 0.13690192 | 0.16004664 | 0.21388544 | 0.17706397 | 1.56232606 | 0.64369558 |
| FCRL6     | 1.14877593 | 0.63940683 | 1.79399148 | 1.01166138 | 1.56165484 | 0.64307562 |
| PSTPIP1   | 3.61739148 | 1.88136336 | 5.6270275  | 2.49835243 | 1.55554839 | 0.63742328 |
| C1QTNF6   | 0.22896139 | 0.12504648 | 0.35579124 | 0.22446096 | 1.55393553 | 0.63592665 |
| GOLGA2P5  | 0.40221348 | 0.2468785  | 0.62372943 | 0.40438382 | 1.55074222 | 0.63295888 |
| MEI1      | 0.33555719 | 0.17686777 | 0.51897619 | 0.23333434 | 1.54661027 | 0.6291097  |
| POU2F2    | 0.53010274 | 0.20930257 | 0.81784696 | 0.47254121 | 1.54280839 | 0.6255589  |
| AKNA      | 5.72413667 | 1.30859221 | 8.8130975  | 2.71533221 | 1.53963786 | 0.62259105 |
| LRIG1     | 0.87224241 | 0.34074454 | 1.33990802 | 0.70919665 | 1.53616473 | 0.61933293 |
| SPTBN1    | 0.87166822 | 0.3322714  | 1.33456867 | 0.55487594 | 1.53105119 | 0.61452252 |
| MARCH9    | 0.82930444 | 0.36926971 | 1.2669864  | 0.57237647 | 1.52776993 | 0.61142731 |
| PRR5      | 0.63133278 | 0.34559156 | 0.95724369 | 0.48739497 | 1.51622682 | 0.60048559 |
| LOC728743 | 0.56376607 | 0.23777456 | 0.83900554 | 0.37968195 | 1.48821573 | 0.57358368 |
| MEGF6     | 0.25209734 | 0.1513084  | 0.37437556 | 0.19910821 | 1.48504369 | 0.57050537 |
| NMT2      | 1.08069956 | 0.48643758 | 1.599565   | 0.63288519 | 1.48011998 | 0.56571412 |
| ITGA4     | 7.32204889 | 4.42840804 | 10.82484   | 4.59413485 | 1.47838947 | 0.56402639 |
| ADHFE1    | 0.54439539 | 0.27349468 | 0.80431447 | 0.56279641 | 1.4774454  | 0.56310481 |
| SLC22A23  | 0.20898473 | 0.12536292 | 0.30814882 | 0.2040122  | 1.47450401 | 0.56022974 |
| RCSL1     | 4.6572863  | 1.80972179 | 6.78959521 | 2.92305503 | 1.45784364 | 0.54383599 |
| SSBP2     | 0.27372995 | 0.1273839  | 0.39902235 | 0.15482249 | 1.45772266 | 0.54371627 |
| CCL28     | 0.35432497 | 0.4487661  | 0.51621029 | 0.35837379 | 1.45688375 | 0.54288576 |
| VILL      | 1.20554311 | 0.36752944 | 1.73908604 | 0.61444613 | 1.44257474 | 0.52864607 |
| PIK3IP1   | 7.54400889 | 1.94489093 | 10.8801952 | 3.20697334 | 1.4422299  | 0.52830116 |
| TMEM71    | 1.084578   | 0.3759032  | 1.55553392 | 1.07735841 | 1.43422964 | 0.52027604 |
| BNIP3     | 1.1508893  | 0.75261448 | 1.64788594 | 0.90869499 | 1.43183705 | 0.51786732 |
| GPR35     | 0.75990548 | 0.53648926 | 1.08673471 | 0.7868956  | 1.43009195 | 0.51610791 |
| PLD6      | 0.28552406 | 0.15755366 | 0.40690917 | 0.17191872 | 1.42513095 | 0.51109449 |
| PRR5L     | 1.14021119 | 0.74996361 | 1.62388763 | 0.72206583 | 1.424199   | 0.51015074 |
| TIFAB     | 0.53568632 | 0.43587268 | 0.76257754 | 0.5279458  | 1.4235524  | 0.50949559 |
| ACPP      | 0.1702926  | 0.21634195 | 0.24201792 | 0.20570386 | 1.42118876 | 0.50709818 |
| ATHL1     | 2.21141448 | 0.91348994 | 3.12947167 | 1.58368502 | 1.41514478 | 0.50094966 |
| RAB3IP    | 0.18023782 | 0.06102083 | 0.25423295 | 0.08629673 | 1.4105417  | 0.49624932 |
| LMO7      | 0.15583743 | 0.09107391 | 0.21963471 | 0.0976285  | 1.40938351 | 0.49506424 |
| ANXA2R    | 1.11347315 | 0.76714379 | 1.56488269 | 0.84735049 | 1.40540676 | 0.49098774 |
| MLLT3     | 0.51832659 | 0.24906803 | 0.727836   | 0.28982306 | 1.40420347 | 0.489752   |
| PHLDB3    | 0.26735762 | 0.15114674 | 0.37366927 | 0.21261532 | 1.39763839 | 0.48299114 |
| NBEAL2    | 4.9399463  | 1.41168328 | 6.86297083 | 2.02307943 | 1.38928045 | 0.47433787 |
| LRRK2     | 1.6406287  | 0.45831201 | 2.27356498 | 1.06086317 | 1.38578886 | 0.47070746 |
| RBM38     | 2.98938667 | 1.03768002 | 4.12882688 | 1.5325885  | 1.38116187 | 0.46588241 |

|           |            |            |            |            |            |            |
|-----------|------------|------------|------------|------------|------------|------------|
| FGL2      | 9.19228    | 8.24836579 | 12.6915988 | 7.29237874 | 1.38068017 | 0.46537917 |
| MSI2      | 1.4138113  | 0.4913567  | 1.95122985 | 0.62369133 | 1.38012043 | 0.46479416 |
| OTUD7B    | 0.16964529 | 0.08698034 | 0.23406265 | 0.1056937  | 1.37971797 | 0.4643734  |
| NT5DC2    | 0.39529553 | 0.28131686 | 0.54375417 | 0.37187877 | 1.37556368 | 0.46002293 |
| MAP3K9    | 0.0978319  | 0.05508968 | 0.13390797 | 0.06176811 | 1.36875573 | 0.45286501 |
| KIAA0125  | 0.01424063 | 0.03223041 | 0.01935032 | 0.02032486 | 1.35881122 | 0.44234503 |
| PIK3CD    | 9.55905296 | 2.06679002 | 12.9102288 | 3.97890932 | 1.35057613 | 0.43357496 |
| SATB1     | 1.5126533  | 0.43836756 | 2.0393379  | 0.92666136 | 1.34818593 | 0.43101948 |
| C10orf95  | 0.40180437 | 0.33369536 | 0.53990993 | 0.38126986 | 1.34371345 | 0.42622552 |
| CBFA2T3   | 0.35383163 | 0.3114358  | 0.47282713 | 0.25503582 | 1.33630544 | 0.4182498  |
| CCR2      | 2.7709177  | 2.51695555 | 3.69541319 | 1.95732473 | 1.33364235 | 0.41537182 |
| SIGIRR    | 3.49577222 | 1.61869294 | 4.65379146 | 1.93008205 | 1.33126278 | 0.41279538 |
| AHDC1     | 0.34600887 | 0.1096694  | 0.45786531 | 0.14143151 | 1.32327621 | 0.40411423 |
| REC8      | 2.57648419 | 0.94581551 | 3.40803021 | 1.43555265 | 1.32274447 | 0.40353439 |
| PDZD2     | 0.0230955  | 0.02060231 | 0.03048888 | 0.02049892 | 1.32012199 | 0.40067126 |
| KDM7A     | 1.10916744 | 0.35324867 | 1.45918223 | 0.55657857 | 1.31556533 | 0.39568289 |
| TCAF2P1   | 0.00822319 | 0.02654042 | 0.0107935  | 0.01841393 | 1.31256812 | 0.3923923  |
| GATS      | 0.77167411 | 0.21562139 | 1.01043346 | 0.33629812 | 1.30940438 | 0.38891071 |
| VAMP1     | 1.541594   | 0.8508778  | 2.0141954  | 0.78097054 | 1.30656671 | 0.38578078 |
| FAM118A   | 1.21514341 | 1.1056333  | 1.58469213 | 0.90217823 | 1.30411943 | 0.38307599 |
| SARDH     | 0.27780516 | 0.45494392 | 0.36228639 | 0.34084501 | 1.30410247 | 0.38305723 |
| ZFPM1     | 0.32152124 | 0.15253713 | 0.41809344 | 0.18685055 | 1.30036025 | 0.37891136 |
| XYLT1     | 0.48547763 | 0.54234578 | 0.62989663 | 0.24036466 | 1.29747816 | 0.37571025 |
| DGKA      | 4.99517222 | 1.21963267 | 6.47895333 | 1.77828797 | 1.29704303 | 0.37522635 |
| FUT7      | 0.33804859 | 0.2862798  | 0.43107748 | 0.25572499 | 1.27519386 | 0.35071659 |
| B3GNT9    | 0.32328052 | 0.17348354 | 0.41220794 | 0.21874534 | 1.2750782  | 0.35058573 |
| EVA1C     | 0.73309656 | 0.28964612 | 0.92807325 | 0.36106646 | 1.26596318 | 0.34023545 |
| TNFRSF1B  | 17.0446222 | 4.19253818 | 21.4212813 | 12.1218922 | 1.25677654 | 0.32972815 |
| SIGLEC10  | 3.58670593 | 1.72795871 | 4.48615269 | 2.77117932 | 1.25077237 | 0.32281926 |
| TNKS1BP1  | 0.36898547 | 0.09833374 | 0.46123581 | 0.18695464 | 1.25001077 | 0.32194053 |
| LAT       | 9.7780037  | 4.62858361 | 12.0992721 | 5.03241009 | 1.23739696 | 0.3073084  |
| METTL7A   | 4.03122148 | 1.15933712 | 4.98170646 | 1.56332641 | 1.23578089 | 0.30542297 |
| FAM198B   | 1.09161926 | 1.11615427 | 1.34882658 | 0.96307976 | 1.23562    | 0.30523512 |
| YPEL3     | 9.17057667 | 3.97607447 | 11.3077667 | 5.19156309 | 1.23304859 | 0.30222966 |
| TNFAIP8L1 | 1.43823693 | 0.39591077 | 1.77077771 | 0.63174981 | 1.23121419 | 0.30008176 |
| TES       | 8.30882778 | 2.40632178 | 10.1822567 | 2.82011507 | 1.22547451 | 0.29334048 |
| YPEL1     | 1.1586217  | 0.24600971 | 1.41127085 | 0.47745042 | 1.21806009 | 0.2845853  |
| TNFSF8    | 1.47099656 | 1.18280167 | 1.76864448 | 0.8381262  | 1.20234441 | 0.26585021 |
| DANCR     | 3.08134852 | 0.82854461 | 3.60868646 | 1.27150671 | 1.17113869 | 0.22791193 |
| GIMAP1    | 2.69845519 | 0.51049217 | 3.09830146 | 0.74013045 | 1.14817599 | 0.19934379 |
| MATK      | 1.85158322 | 3.68516919 | 2.1148809  | 1.56248528 | 1.14220137 | 0.19181702 |
| NFIX      | 1.17848759 | 0.26433297 | 1.33841813 | 0.30847547 | 1.13570829 | 0.18359232 |
| DGKD      | 1.78375741 | 0.30500348 | 2.00014083 | 0.44016932 | 1.12130765 | 0.16518217 |
| S100B     | 2.24444195 | 3.28380351 | 2.48603242 | 1.63718885 | 1.10763944 | 0.14748832 |
| CLEC10A   | 3.71344259 | 4.48424023 | 3.70408308 | 2.46463582 | 1.00252681 | -0.0036408 |
