# Supplementary material
Source: HighWire-hosted journal article supplement (https://thorax.bmj.com/content/76/2/134)
Supplement: inline-supplementary-material-18 [file inline-supplementary-material-18.pdf]

**Supplementary Table 13: List of enriched pathways for 666 genes in module 31 from WGCNA analysis**

| Function                                                                      | FDR        | Genes in network | Genes in genome |
|-------------------------------------------------------------------------------|------------|------------------|-----------------|
| T cell activation                                                             | 1.69E-19   | 66               | 452             |
| regulation of cell activation                                                 | 1.18E-14   | 58               | 593             |
| regulation of leukocyte activation                                            | 1.18E-14   | 56               | 556             |
| regulation of lymphocyte activation                                           | 5.95E-14   | 51               | 480             |
| regulation of T cell activation                                               | 8.83E-12   | 42               | 309             |
| antigen receptor-mediated signaling pathway                                   | 4.21E-11   | 36               | 258             |
| positive regulation of leukocyte activation                                   | 1.27E-09   | 39               | 379             |
| positive regulation of cell activation                                        | 2.75E-09   | 40               | 391             |
| positive regulation of lymphocyte activation                                  | 7.78E-09   | 37               | 341             |
| T cell receptor signaling pathway                                             | 8.36E-09   | 27               | 144             |
| T cell receptor signaling pathway                                             | 8.36E-09   | 21               | 99              |
| immune response-activating cell surface receptor :<br>T cell receptor complex | 1.86E-08   | 41               | 409             |
| positive regulation of T cell activation                                      | 3.29E-08   | 10               | 17              |
| cellular defense response                                                     | 3.64E-08   | 30               | 204             |
| immune response-regulating cell surface receptor                              | 1.50E-07   | 15               | 58              |
| T cell differentiation                                                        | 5.57E-07   | 45               | 440             |
| lymphocyte costimulation                                                      | 3.73E-06   | 37               | 236             |
| T cell costimulation                                                          | 5.81E-06   | 14               | 56              |
| lymphocyte differentiation                                                    | 5.81E-06   | 14               | 55              |
| leukocyte differentiation                                                     | 6.12E-06   | 48               | 346             |
| hemopoiesis                                                                   | 1.58E-05   | 56               | 505             |
| external side of plasma membrane                                              | 2.58E-05   | 69               | 831             |
| hematopoietic or lymphoid organ development                                   | 9.66E-05   | 43               | 365             |
| immune system development                                                     | 0.00010501 | 73               | 872             |
| lymphocyte migration                                                          | 0.00010501 | 77               | 918             |
| B cell activation                                                             | 0.00012429 | 15               | 103             |
| cytokine receptor activity                                                    | 0.00017007 | 30               | 309             |
| side of membrane                                                              | 0.00020042 | 14               | 94              |
| receptor complex                                                              | 0.00078533 | 55               | 560             |
| leukocyte migration                                                           | 0.00088427 | 41               | 396             |
| T cell apoptotic process                                                      | 0.0009346  | 36               | 476             |
| leukocyte mediated immunity                                                   | 0.00108952 | 10               | 51              |
| signaling adaptor activity                                                    | 0.00125424 | 52               | 867             |
| T cell migration                                                              | 0.00128438 | 12               | 80              |
| lymphocyte apoptotic process                                                  | 0.00206739 | 11               | 58              |
| lymphocyte proliferation                                                      | 0.003853   | 11               | 72              |
| SH3/SH2 adaptor activity                                                      | 0.00455017 | 30               | 268             |
| mononuclear cell proliferation                                                | 0.00517188 | 10               | 54              |
| alpha-beta T cell activation                                                  | 0.00526335 | 30               | 270             |
| leukocyte proliferation                                                       | 0.00961377 | 25               | 131             |
| adaptive immune response                                                      | 0.00988882 | 31               | 287             |
| CD4-positive, alpha-beta T cell activation                                    | 0.01106184 | 64               | 614             |
| lymphocyte mediated immunity                                                  | 0.01656242 | 12               | 86              |
| leukocyte apoptotic process                                                   | 0.01656242 | 31               | 345             |
| regulation of leukocyte mediated immunity                                     | 0.01757722 | 13               | 103             |
| regulation of natural killer cell mediated immunity                           | 0.01768682 | 19               | 190             |
| regulation of T cell apoptotic process                                        | 0.0176964  | 12               | 42              |
| immunological synapse                                                         | 0.0176964  | 8                | 37              |
| SH2 domain binding                                                            | 0.02453644 | 12               | 35              |
| regulation of lymphocyte differentiation                                      | 0.02681714 | 8                | 33              |
| regulation of lymphocyte proliferation                                        | 0.03705731 | 20               | 168             |
| regulation of lymphocyte proliferation                                        | 0.04707768 | 25               | 208             |
