# Supplementary material
Source: HighWire-hosted journal article supplement (https://thorax.bmj.com/content/76/2/134)
Supplement: inline-supplementary-material-19 [file inline-supplementary-material-19.pdf]

**Supplementary Table 14: List of 135 top red genes input in GeneMANIA**

|           | group 2 avg | group 2 sd | group 2 cv | group 3 avg | group 3 sd | group 3 cv | FC         | logFC       |
|-----------|-------------|------------|------------|-------------|------------|------------|------------|-------------|
| KIR2DL1   | 0.00019698  | 0.00102356 | 5.19615242 | 0.04033766  | 0.12501806 | 3.09928845 | 204.775885 | 7.67790202  |
| PDZK1IP1  | 0.0120123   | 0.03048899 | 2.53814717 | 0.20516608  | 0.34672501 | 1.68997236 | 17.0796668 | 4.09420792  |
| MMRN1     | 0.00129724  | 0.00322589 | 2.48673939 | 0.01751809  | 0.02904393 | 1.65793958 | 13.5041587 | 3.75533186  |
| TNFRSF13C | 0.01177415  | 0.03468898 | 2.94619844 | 0.15619067  | 0.3184038  | 2.03855842 | 13.26556   | 3.72961368  |
| RLN2      | 0.01266902  | 0.02469827 | 1.94950088 | 0.13661401  | 0.19561325 | 1.43186813 | 10.7833115 | 3.43072838  |
| INSL3     | 0.0194798   | 0.08920262 | 4.57923783 | 0.18269693  | 0.33744795 | 1.84703681 | 9.37879032 | 3.22940186  |
| NUGGC     | 0.04499276  | 0.05066229 | 1.12600974 | 0.38793592  | 0.39959135 | 1.03004473 | 8.62218456 | 3.10805344  |
| FCRL5     | 0.00746028  | 0.01392186 | 1.86613128 | 0.06354694  | 0.1269395  | 1.9975708  | 8.51803669 | 3.09052095  |
| CCR8      | 0.05110063  | 0.06744294 | 1.31980631 | 0.41492774  | 0.38787953 | 0.93481226 | 8.11981591 | 3.02144702  |
| SYNGR3    | 0.03047795  | 0.03713027 | 1.21826671 | 0.21729968  | 0.25899474 | 1.19187815 | 7.12973366 | 2.83384818  |
| GZMA      | 1.59157504  | 1.28944652 | 0.81017011 | 11.1507319  | 13.1751834 | 1.18155325 | 7.00609875 | 2.80861132  |
| IGLL5     | 0.19034409  | 0.32844602 | 1.72553831 | 1.33032132  | 2.83167441 | 2.12856426 | 6.98903404 | 2.80509307  |
| B3GAT1    | 0.02211549  | 0.04113053 | 1.8598067  | 0.15331529  | 0.14000173 | 0.91316227 | 6.93248453 | 2.79337249  |
| NBL1      | 0.07160343  | 0.11469574 | 1.60181899 | 0.49466354  | 0.64854986 | 1.31109293 | 6.90837738 | 2.78834689  |
| GPR174    | 0.18412317  | 0.17964951 | 0.97570293 | 1.26287521  | 1.06112107 | 0.84024222 | 6.85886101 | 2.77796902  |
| GPR25     | 0.07518413  | 0.10728933 | 1.42702092 | 0.50525087  | 0.43144611 | 0.85392453 | 6.72017941 | 2.74849975  |
| THEMIS    | 0.26184956  | 0.16378276 | 0.6254842  | 1.73566198  | 1.65597634 | 0.95408919 | 6.62847012 | 2.72867593  |
| SLC14A1   | 0.0073932   | 0.01886136 | 2.55117712 | 0.04840051  | 0.06526873 | 1.34851326 | 6.54662634 | 2.71075164  |
| JCHAIN    | 0.34766809  | 0.27038767 | 0.77771782 | 2.26160038  | 5.75075282 | 2.54278027 | 6.50505605 | 2.70156149  |
| UGT8      | 0.00361752  | 0.00852439 | 2.35641668 | 0.02310336  | 0.03970047 | 1.7183852  | 6.38651513 | 2.67502893  |
| POU2AF1   | 0.02140636  | 0.02321959 | 1.08470518 | 0.13624998  | 0.14889212 | 1.0927864  | 6.36492885 | 2.67014439  |
| TRAT1     | 0.35525602  | 0.27276737 | 0.76780508 | 2.25167879  | 1.73956235 | 0.77256239 | 6.33818626 | 2.66407006  |
| CCL5      | 6.28860396  | 5.10000515 | 0.81099163 | 39.8482565  | 44.7132863 | 1.1220889  | 6.33658228 | 2.66370491  |
| GNLY      | 1.25147974  | 1.52840668 | 1.2212796  | 7.88663358  | 7.94289161 | 1.00713334 | 6.30184679 | 2.65577468  |
| CD96      | 0.56301017  | 0.31039736 | 0.5513175  | 3.51169571  | 2.86461486 | 0.8157355  | 6.23735746 | 2.64093494  |
| GZMB      | 1.44071956  | 1.12212935 | 0.7788673  | 8.95852288  | 11.9174787 | 1.33029506 | 6.21808932 | 2.63647134  |
| SH2D2A    | 0.48524886  | 0.36750936 | 0.75736266 | 3.01587021  | 2.97763449 | 0.98732183 | 6.2151001  | 2.63577763  |
| SLA2      | 0.48852211  | 0.29108354 | 0.59584517 | 3.02720869  | 3.04579467 | 1.00613965 | 6.19666673 | 2.63149238  |
| FSD1      | 0.01601426  | 0.01397942 | 2.33525765 | 0.09922711  | 0.11499317 | 1.15888864 | 6.19617209 | 2.63137721  |
| IL12RB2   | 0.09705867  | 0.06793307 | 0.69991756 | 0.60008216  | 0.59241632 | 0.98722535 | 6.18267446 | 2.62823105  |
| AFAP1L2   | 0.01754869  | 0.02667657 | 1.52014585 | 0.10803521  | 0.1312316  | 1.21471133 | 6.15631175 | 2.62206629  |
| VIPR1     | 0.02432363  | 0.03603023 | 1.48128544 | 0.14774459  | 0.16238692 | 1.09910574 | 6.07411883 | 2.60267513  |
| RAB27B    | 0.02408278  | 0.02189311 | 0.88400546 | 0.14597002  | 0.16550382 | 1.13382063 | 6.06117717 | 2.59959801  |
| IL32      | 3.62018982  | 2.42056331 | 0.66862884 | 21.8393594  | 19.9296256 | 0.91255541 | 6.03265588 | 2.59279329  |
| NCR1      | 0.05403209  | 0.08834303 | 1.63501041 | 0.32575795  | 0.52001303 | 1.59631721 | 6.02897161 | 2.591919194 |
| FASLG     | 0.23764372  | 0.17998526 | 0.75737438 | 1.42355367  | 1.33041698 | 0.93457451 | 5.99028536 | 2.58262473  |
| IGFBP3    | 0.02510511  | 0.04034243 | 1.60694138 | 0.14862995  | 0.151472   | 1.01912168 | 5.92030737 | 2.56567208  |
| IKZF3     | 0.44173267  | 0.24158121 | 0.54689459 | 2.60661892  | 2.13471487 | 0.81895932 | 5.90089689 | 2.56093425  |
| F2R       | 0.24021975  | 0.12736107 | 0.53018568 | 1.41504235  | 1.26025275 | 0.89061133 | 5.89061626 | 2.55841857  |
| PXYLP1    | 0.03291064  | 0.0363995  | 1.1060099  | 0.19222427  | 0.13141346 | 0.68364653 | 5.84079322 | 2.54616431  |
| PRF1      | 0.77566948  | 0.53383674 | 0.68822707 | 4.51654215  | 5.17800792 | 1.14645403 | 5.82276634 | 2.54170473  |
| ZNF831    | 0.08438874  | 0.06140096 | 0.72770327 | 0.48948402  | 0.32372437 | 0.6613584  | 5.80034793 | 2.53613944  |
| TAL1      | 0.00644937  | 0.01174021 | 1.82036628 | 0.03728549  | 0.08876141 | 2.38058867 | 5.78126128 | 2.53138427  |
| TBX21     | 0.17253784  | 0.13697584 | 0.7938887  | 0.99133374  | 0.76852976 | 0.77524827 | 5.74560198 | 2.52245805  |
| BCL11B    | 0.16861851  | 0.09648407 | 0.57220331 | 0.96834417  | 0.76516753 | 0.79018138 | 5.74281056 | 2.52175697  |
| TGFBR3    | 0.05271254  | 0.03250121 | 0.61657464 | 0.30169622  | 0.27794859 | 0.92128629 | 5.72342412 | 2.51687852  |
| SH2D1A    | 0.1621508   | 0.12367225 | 0.76269899 | 0.91850198  | 0.83990364 | 0.91442769 | 5.66449247 | 2.5019467   |
| DBH       | 0.01026128  | 0.01928324 | 1.87922384 | 0.05800655  | 0.06437279 | 1.10975038 | 5.65295381 | 2.49900491  |
| TMIGD2    | 0.11435374  | 0.14521283 | 1.26985634 | 0.64328589  | 0.6416285  | 0.99742355 | 5.62540295 | 2.49195644  |
| ATP1A3    | 0.04544567  | 0.04465002 | 0.98249229 | 0.25521634  | 0.18724886 | 0.73368679 | 5.61585561 | 2.48950584  |
| NGF7      | 1.58680756  | 1.28456363 | 0.80952704 | 8.89509565  | 14.4594131 | 1.62554892 | 5.60565496 | 2.48688295  |
| CD40LG    | 0.5825414   | 0.40721471 | 0.69903137 | 3.25870085  | 2.64685094 | 0.81224115 | 5.59393865 | 2.48386443  |
| TC2N      | 0.27754756  | 0.1731116  | 0.62371867 | 1.55042306  | 1.05962994 | 0.68344568 | 5.58615268 | 2.48185501  |
| KCNQ5     | 0.00315381  | 0.00456762 | 1.44828738 | 0.01730024  | 0.02118742 | 1.22468912 | 5.48551141 | 2.45562613  |
| CXCR3     | 0.65944492  | 0.38110443 | 0.57791699 | 3.58074869  | 2.77191493 | 0.77411602 | 5.42994353 | 2.44093719  |
| CDHR1     | 0.0124987   | 0.01802525 | 1.44217034 | 0.06781385  | 0.08818369 | 1.30037866 | 5.42567271 | 2.43980202  |
| GRAP2     | 0.43113905  | 0.31029099 | 0.7197005  | 2.33914179  | 1.60805636 | 0.6874557  | 5.42549278 | 2.43975418  |
| PPP1R16B  | 0.62383882  | 0.30935568 | 0.49589041 | 3.35582698  | 2.87486904 | 0.85667976 | 5.37931738 | 2.42742311  |
| IL18RAP   | 0.2293542   | 0.15773314 | 0.68772727 | 1.23269585  | 1.11029751 | 0.90070678 | 5.37463824 | 2.42616765  |
| ST8SIA1   | 0.01797936  | 0.01348514 | 0.75003469 | 0.09622619  | 0.08702098 | 0.90433781 | 5.35203631 | 2.4200879   |
| ABCD2     | 0.03894318  | 0.03365154 | 0.86411896 | 0.20821499  | 0.17685115 | 0.849368   | 5.34663583 | 2.41863142  |
| JAKMIP1   | 0.17138966  | 0.21435693 | 1.25069926 | 0.91583998  | 0.8532247  | 0.93163076 | 5.34361271 | 2.41781545  |
| CD3E      | 2.36112544  | 1.45388634 | 0.61572626 | 12.5811892  | 8.6942895  | 0.69105467 | 5.32818028 | 2.4136429   |
| IL2RB     | 1.175121    | 0.69336739 | 0.59003914 | 6.24524646  | 4.83170144 | 0.77366065 | 5.31455608 | 2.40994919  |
| ITM2A     | 0.46707747  | 0.30977972 | 0.66322985 | 2.47528883  | 2.33337692 | 0.94266854 | 5.29952518 | 2.4058631   |
| LCK       | 1.69059793  | 0.93399487 | 0.55246422 | 8.92982563  | 6.18071065 | 0.69214237 | 5.28205169 | 2.40109842  |
| TSPAN5    | 0.09107504  | 0.06695601 | 0.73517409 | 0.47870287  | 0.38603451 | 0.80641778 | 5.25613658 | 2.39400277  |
| PLXDC1    | 0.05833162  | 0.05206994 | 0.89265371 | 0.3061764   | 0.23726055 | 0.77491456 | 5.24889225 | 2.39201298  |

|           |            |            |            |            |            |            |            |            |
|-----------|------------|------------|------------|------------|------------|------------|------------|------------|
| GZMM      | 0.25287297 | 0.33780228 | 1.33585764 | 1.32604504 | 1.30462252 | 0.9838448  | 5.24391776 | 2.39064506 |
| EOMES     | 0.17169982 | 0.1154152  | 0.67219173 | 0.89647194 | 1.1828329  | 1.31943104 | 5.22115844 | 2.38436994 |
| NLRC3     | 0.35255783 | 0.16862711 | 0.47829632 | 1.83988821 | 1.30881973 | 0.71135829 | 5.21868486 | 2.38368629 |
| EPHA4     | 0.02687659 | 0.03316182 | 1.23385526 | 0.14006755 | 0.14274876 | 1.01914225 | 5.21150786 | 2.38170085 |
| LY9       | 0.39196658 | 0.20456869 | 0.52190341 | 2.03095888 | 1.62257604 | 0.79892117 | 5.18145931 | 2.37335848 |
| CAMK2N1   | 0.02592453 | 0.03886362 | 1.49910622 | 0.13214145 | 0.14272034 | 1.08005734 | 5.09715944 | 2.34969348 |
| SH2D1B    | 0.05160319 | 0.04554132 | 0.88252922 | 0.26221192 | 0.47639082 | 1.81681601 | 5.08131271 | 2.34520125 |
| UBASH3A   | 0.34987843 | 0.27165859 | 0.77643707 | 1.77043002 | 1.4086806  | 0.79567144 | 5.06012904 | 2.33917418 |
| ZNF683    | 0.75736665 | 1.13005618 | 1.492086   | 3.80707567 | 3.30945475 | 0.86929051 | 5.02672736 | 2.32961944 |
| INPP4B    | 0.11243197 | 0.08673199 | 0.77141754 | 0.56469019 | 0.45137603 | 0.79933394 | 5.0225057  | 2.3284073  |
| KLRC3     | 0.0749891  | 0.10691804 | 1.4257812  | 0.37637755 | 0.51426297 | 1.36634868 | 5.01909702 | 2.32742784 |
| PTGDR     | 0.05409146 | 0.06594804 | 1.21919503 | 0.26983797 | 0.21224665 | 0.78657075 | 4.98854998 | 2.31862053 |
| LZTS1     | 0.04807353 | 0.0486097  | 1.01115311 | 0.23783221 | 0.20319939 | 0.85438128 | 4.94725954 | 2.30662959 |
| SPOCK2    | 1.32542707 | 0.73149534 | 0.55189407 | 6.54782896 | 3.86814992 | 0.59075305 | 4.94016539 | 2.30455934 |
| ZAP70     | 0.75990685 | 0.52542708 | 0.69143616 | 3.73737617 | 2.51110242 | 0.67188913 | 4.91820301 | 2.29813129 |
| CD8A      | 1.4592963  | 1.17404821 | 0.80453038 | 7.13849431 | 9.79134177 | 1.37162563 | 4.89173743 | 2.29034697 |
| ITM2C     | 0.4736768  | 0.25131552 | 0.53056329 | 2.2892474  | 3.34110407 | 1.45947707 | 4.83293118 | 2.27289845 |
| PLCXD2    | 0.0341641  | 0.03799593 | 1.11215952 | 0.16503658 | 0.12013534 | 0.72793162 | 4.8307022  | 2.2723292  |
| ITK       | 1.0098732  | 0.51857676 | 0.5135068  | 4.86882    | 3.20192635 | 0.65763909 | 4.82121912 | 2.269398   |
| IL31RA    | 0.0105281  | 0.03555224 | 3.3768919  | 0.0506839  | 0.05979556 | 1.17977432 | 4.814156   | 2.26728289 |
| APOBEC3D  | 0.23356996 | 0.18780266 | 0.80405314 | 1.12318931 | 0.82136014 | 0.73127489 | 4.80879176 | 2.26567445 |
| CD79A     | 0.15457058 | 0.1921099  | 1.242862   | 0.74018684 | 1.09118799 | 1.47420614 | 4.7886657  | 2.25962372 |
| ETS1      | 1.51691856 | 0.67192429 | 0.44295344 | 7.220055   | 4.54809696 | 0.62992553 | 4.75968533 | 2.2508662  |
| KIR2DL4   | 0.03668346 | 0.09459103 | 2.57857447 | 0.17353914 | 0.21171529 | 1.21998584 | 4.73071894 | 2.24205945 |
| RORC      | 0.12125477 | 0.10814133 | 0.89185218 | 0.56227033 | 0.47124541 | 0.83811182 | 4.63709853 | 2.21322238 |
| GNG2      | 0.69373204 | 0.27040548 | 0.38978376 | 3.20751354 | 2.21266124 | 0.68983691 | 4.62356266 | 2.20900494 |
| NPDC1     | 0.09031202 | 0.0894995  | 0.99100329 | 0.41526988 | 0.48206219 | 1.16084073 | 4.59816865 | 2.20105938 |
| TNFRSF25  | 0.66778993 | 0.51483209 | 0.77094917 | 3.0284016  | 1.77115553 | 0.5848483  | 4.5349615  | 2.1810903  |
| DOCK9     | 0.14048824 | 0.07813332 | 0.5561556  | 0.63521503 | 0.47033861 | 0.74044    | 4.52148169 | 2.17679562 |
| APBA2     | 0.05642016 | 0.07058087 | 1.25098663 | 0.25479413 | 0.24782617 | 0.9726526  | 4.51601193 | 2.1750493  |
| AN09      | 0.17690799 | 0.13102017 | 0.74061192 | 0.79866027 | 0.52170868 | 0.65322979 | 4.51455168 | 2.17458273 |
| GPR171    | 0.82342663 | 0.47608588 | 0.57817644 | 3.71667646 | 3.26817247 | 0.8793266  | 4.51367047 | 2.17430109 |
| LAG3      | 0.43290487 | 0.25425024 | 0.58731203 | 1.94890867 | 2.74678652 | 1.40939725 | 4.50193287 | 2.17054455 |
| MS4A1     | 0.15021376 | 0.13216219 | 0.87982744 | 0.67601114 | 0.59879176 | 0.88577202 | 4.50032771 | 2.17003006 |
| FRMPD3    | 0.01271124 | 0.01746973 | 1.37435301 | 0.05691599 | 0.06613143 | 1.16191314 | 4.47761012 | 2.16272892 |
| CD247     | 1.03377952 | 0.58383996 | 0.56476255 | 4.62704188 | 3.41703434 | 0.7384922  | 4.47584982 | 2.16216163 |
| DAPK2     | 0.16503712 | 0.10167745 | 0.61608835 | 0.73802006 | 0.66729998 | 0.90417593 | 4.47184288 | 2.1608695  |
| DTX3      | 0.10698597 | 0.09421962 | 0.8806726  | 0.47573545 | 0.42844677 | 0.90059879 | 4.44670859 | 2.15273786 |
| KLRD1     | 0.20663585 | 0.15618156 | 0.75582994 | 0.91662182 | 1.16592887 | 1.27198464 | 4.43592829 | 2.14923604 |
| RGS9      | 0.12021737 | 0.10610308 | 0.88259357 | 0.53265303 | 0.39591383 | 0.74328653 | 4.43074919 | 2.14755066 |
| STAT4     | 0.48318653 | 0.26097751 | 0.54011752 | 2.13665754 | 1.51803974 | 0.71047405 | 4.42201385 | 2.14470354 |
| VSIG1     | 0.01391095 | 0.0136939  | 0.98439718 | 0.06103802 | 0.05759834 | 0.94364696 | 4.38776714 | 2.13348696 |
| RASGRP1   | 0.60750393 | 0.25248517 | 0.41561076 | 2.6438124  | 1.69685668 | 0.6418219  | 4.35192644 | 2.12165417 |
| BTBD11    | 0.04106285 | 0.03153554 | 0.76798222 | 0.17701067 | 0.1253447  | 0.70811948 | 4.31072588 | 2.10793082 |
| TRAF3IP3  | 1.24139607 | 0.72006131 | 0.58004156 | 5.35104108 | 3.07342127 | 0.5743595  | 4.31050266 | 2.10785612 |
| PYHIN1    | 0.3313994  | 0.23330214 | 0.70399083 | 1.42356471 | 1.24353621 | 0.87353684 | 4.29561648 | 2.10286519 |
| BTLA      | 0.0887307  | 0.07251019 | 0.81719386 | 0.38100154 | 0.31996848 | 0.83980889 | 4.29390874 | 2.10229153 |
| TNFRSF13B | 0.02105781 | 0.05874161 | 2.78954058 | 0.09030562 | 0.13051875 | 1.44530039 | 4.28846266 | 2.10046056 |
| KLRK1     | 0.87173129 | 0.80820027 | 0.92712087 | 3.72089858 | 3.61855318 | 0.97249444 | 4.26840088 | 2.09369568 |
| GCNT4     | 0.01281027 | 0.01657013 | 1.29350404 | 0.05440817 | 0.06931804 | 1.27403738 | 4.24723118 | 2.08652264 |
| SYNE2     | 0.72455889 | 0.48328222 | 0.66700198 | 3.07680788 | 1.9819903  | 0.64417097 | 4.24645658 | 2.0862595  |
| P2RY10    | 0.29538967 | 0.18723001 | 0.63384075 | 1.25139983 | 0.84636577 | 0.67633521 | 4.23643741 | 2.08285155 |
| GPR18     | 0.13048024 | 0.1158386  | 0.88778651 | 0.55141048 | 0.57225857 | 1.03780866 | 4.22600751 | 2.07929533 |
| ABCB1     | 0.05029328 | 0.04283782 | 0.85176027 | 0.21141156 | 0.16540727 | 0.78239464 | 4.20357471 | 2.07161671 |
| ITPR1PL1  | 0.18207195 | 0.21569862 | 1.18468889 | 0.76482506 | 0.65093957 | 0.85109602 | 4.20067481 | 2.07062111 |
| PDCD1     | 0.15741346 | 0.13444369 | 0.85408005 | 0.65899779 | 0.68717062 | 1.04275102 | 4.18641331 | 2.06571475 |
| LEF1      | 0.25584001 | 0.18374759 | 0.71821288 | 1.06651153 | 0.79700433 | 0.74730024 | 4.16866592 | 2.05958576 |
| MZB1      | 0.10773059 | 0.15479974 | 1.4369154  | 0.44504572 | 0.9083906  | 2.04111746 | 4.1310991  | 2.04652567 |
| SIT1      | 0.57899719 | 0.30061469 | 0.51919887 | 2.38977258 | 2.03793617 | 0.8527741  | 4.12743383 | 2.04524509 |
| SLC38A1   | 0.49947222 | 0.22326894 | 0.44700972 | 2.05472077 | 1.25864227 | 0.61256122 | 4.11378387 | 2.040466   |
| WNT10B    | 0.0344504  | 0.04934519 | 1.43235448 | 0.14115638 | 0.13265328 | 0.93976112 | 4.09737966 | 2.03470158 |
| IFITM1    | 7.22145444 | 4.40675271 | 0.61023063 | 29.4367513 | 26.4899932 | 0.89989527 | 4.07629121 | 2.02725712 |
| KLRB1     | 1.41598993 | 1.18518225 | 0.83699907 | 5.77197548 | 5.36703836 | 0.92984428 | 4.07628287 | 2.02725417 |
| P2RY8     | 0.43866363 | 0.25880378 | 0.58998231 | 1.78027054 | 1.24202792 | 0.69766245 | 4.05839559 | 2.0209095  |
| PTPRCAP   | 5.41662037 | 2.85905598 | 0.52783023 | 21.975985  | 18.3436798 | 0.8347148  | 4.0571396  | 2.02046294 |
| CD226     | 0.37003045 | 0.25081613 | 0.67782565 | 1.49931769 | 1.15000122 | 0.76701638 | 4.05187649 | 2.0185902  |
| ATP8B2    | 0.60596485 | 0.27332635 | 0.45105974 | 2.44166588 | 1.31700613 | 0.53938835 | 4.02938531 | 2.01055977 |
