# Supplementary material
Source: HighWire-hosted journal article supplement (https://thorax.bmj.com/content/76/2/134)
Supplement: inline-supplementary-material-20 [file inline-supplementary-material-20.pdf]

Supplementary Table 15: List of 125 differentially expressed genes in PBMC for cluster 2 and cluster 3 with FDR

|             | logFC      | logCPM     | F          | PValue     | FDR.CvsB   |
|-------------|------------|------------|------------|------------|------------|
| MIR34A      | 4.91100099 | 0.27120568 | 22.3753333 | 9.53E-06   | 0.00372488 |
| C1QC        | 4.3734327  | 3.87396901 | 24.1025232 | 4.80E-06   | 0.00284281 |
| C1QB        | 3.73733466 | 5.48140523 | 23.1995994 | 6.89E-06   | 0.00311803 |
| SNORD99     | 4.26487779 | 3.18160721 | 24.7999282 | 3.64E-06   | 0.00280005 |
| MIR30C1     | 6.42242847 | 6.84635877 | 19.9237262 | 2.64E-05   | 0.00766639 |
| SNORD55     | 2.58873694 | 0.67154204 | 16.2112667 | 0.00012668 | 0.02343452 |
| SNORD46     | 3.34768239 | 1.19952759 | 15.0308633 | 0.00021631 | 0.0348648  |
| C8B         | 3.69460478 | -0.5736955 | 20.2558161 | 2.24E-05   | 0.00688058 |
| GNG12       | 3.09860304 | -1.5409717 | 22.0395919 | 1.02E-05   | 0.0038171  |
| SNORD45C    | 2.77566822 | -1.079895  | 16.1131521 | 0.00013025 | 0.02382456 |
| SCARNA2     | -1.3666945 | -0.3355686 | 16.9042117 | 8.82E-05   | 0.01888283 |
| PPIAL4F     | 3.10785705 | 1.72364089 | 17.523004  | 7.26E-05   | 0.01618733 |
| PPIAL4D     | 3.10785705 | 1.72364089 | 17.523004  | 7.26E-05   | 0.01618733 |
| PPIAL4E     | 3.10785705 | 1.72364089 | 17.523004  | 7.26E-05   | 0.01618733 |
| MIR9-1      | 6.85069619 | 2.89916269 | 26.3315835 | 2.00E-06   | 0.00217    |
| FCGR2A      | 0.41014682 | 7.26096165 | 14.969062  | 0.00020931 | 0.03407335 |
| SNORD79     | 3.19209935 | 1.86113199 | 20.9999068 | 1.67E-05   | 0.0057981  |
| SNORD75     | 4.43235062 | -1.2565089 | 18.9425408 | 3.92E-05   | 0.01012794 |
| PHLDA3      | 2.11908127 | 0.46136705 | 15.359284  | 0.00018158 | 0.03079118 |
| MIR1182     | 2.18260955 | 0.35015509 | 15.0587321 | 0.000208   | 0.03407335 |
| ITIH5       | 3.85651378 | 1.08786707 | 24.6639459 | 3.78E-06   | 0.00280005 |
| MRC1        | 4.18318351 | 4.79250964 | 30.6944938 | 3.82E-07   | 0.00207048 |
| RBP4        | 4.4050249  | -0.5270868 | 26.3734881 | 1.89E-06   | 0.00217    |
| SCD         | 2.49271936 | 4.22194854 | 19.2423532 | 3.50E-05   | 0.00919996 |
| NT5C2       | 0.27901679 | 5.73860756 | 15.1463279 | 0.0001932  | 0.03229614 |
| HBB         | 2.23101306 | 9.46087953 | 13.9228034 | 0.00035659 | 0.04719423 |
| SNORA45B    | 2.3269267  | -0.6207748 | 16.1755594 | 0.00012507 | 0.02343452 |
| SERPING1    | 2.38264863 | 4.81622427 | 20.6409271 | 1.95E-05   | 0.00649239 |
| SNORD26     | 2.59450413 | 1.2798268  | 17.5020286 | 7.25E-05   | 0.01618733 |
| SLCO2B1     | 4.63682434 | 3.03568764 | 23.9099245 | 5.18E-06   | 0.00284281 |
| ADAMTS15    | 1.58703787 | -1.3586196 | 14.8283988 | 0.00022307 | 0.03490981 |
| CCND2       | -0.3727651 | 5.43090696 | 13.8933963 | 0.0003417  | 0.04597155 |
| OLR1        | 4.54240615 | 2.76673493 | 22.1135078 | 1.07E-05   | 0.00384105 |
| BCL2L14     | 2.78357744 | 0.02979616 | 19.5645305 | 2.94E-05   | 0.00825263 |
| GPD1        | 4.07133225 | 1.49535156 | 25.0678325 | 3.25E-06   | 0.00273212 |
| TRHDE       | 1.77669936 | -0.6036691 | 13.7469686 | 0.00036858 | 0.04838851 |
| GLT8D2      | 2.54335817 | -0.8271741 | 15.6258347 | 0.00016118 | 0.02791248 |
| LOC10099667 | 4.57698958 | -1.4377872 | 22.3431026 | 9.46E-06   | 0.00372488 |
| RN7SL1      | -2.0962353 | 9.17208692 | 36.4565362 | 4.72E-08   | 0.00038407 |
| RN7SL2      | -2.2266135 | 9.35487608 | 39.6622512 | 1.56E-08   | 0.00025319 |
| IFI27       | 4.02409739 | 1.64053188 | 24.1018374 | 4.77E-06   | 0.00284281 |
| GLDN        | 3.74779733 | 0.382585   | 23.5771756 | 5.78E-06   | 0.00290238 |

|             |            |            |            |            |            |
|-------------|------------|------------|------------|------------|------------|
| SNORD16     | 2.44099963 | 0.39635601 | 13.9642295 | 0.00034497 | 0.04603109 |
| PAQR5       | 3.98213753 | -0.5524676 | 26.7384957 | 1.61E-06   | 0.00217    |
| CD276       | 3.55008184 | 0.18080116 | 22.5513794 | 8.71E-06   | 0.00363976 |
| LOC727751   | -0.6184965 | 2.24153937 | 13.6638917 | 0.00037972 | 0.0494519  |
| MIR9-3      | 6.85197407 | 2.89880577 | 26.3328837 | 2.00E-06   | 0.00217    |
| MSLN        | -1.5192962 | -1.2791988 | 17.6740814 | 6.29E-05   | 0.01504749 |
| NUPR1       | 4.20432839 | 0.13756377 | 20.4005941 | 2.14E-05   | 0.00682675 |
| SNORD71     | 4.28077833 | 1.47375209 | 18.8111143 | 4.20E-05   | 0.01052154 |
| BCAR1       | 1.73299821 | -0.8355556 | 14.4104088 | 0.00027103 | 0.0404783  |
| SNORD42A    | 5.04028802 | 1.71015222 | 26.6082088 | 1.79E-06   | 0.00217    |
| CCL18       | 6.43552971 | 2.70305306 | 27.0295679 | 1.53E-06   | 0.00217    |
| AOC3        | 3.39140345 | 1.32578822 | 20.5593654 | 2.01E-05   | 0.0065282  |
| MYL4        | 2.25664124 | -0.8726164 | 14.0713985 | 0.00032186 | 0.04556087 |
| COL5A3      | -1.1556464 | 1.92371427 | 14.526773  | 0.00025913 | 0.03905868 |
| SNORD41     | 4.91188793 | -0.3553899 | 23.7781929 | 5.37E-06   | 0.00284281 |
| AXL         | 2.20408153 | 1.9954251  | 15.2579769 | 0.00019442 | 0.03229614 |
| APOE        | 4.02656548 | 1.28491126 | 23.0118765 | 7.37E-06   | 0.00324331 |
| APOC1       | 5.34831154 | 3.86704221 | 22.6160174 | 8.72E-06   | 0.00363976 |
| APOC1P1     | 4.22814108 | -1.3335144 | 25.4056883 | 2.71E-06   | 0.00259542 |
| APOC4-APOC  | 4.42897373 | 0.80201721 | 26.9555446 | 1.54E-06   | 0.00217    |
| APOC2       | 4.73299234 | 0.76918221 | 25.7002562 | 2.53E-06   | 0.00257146 |
| SNORD33     | 3.77285159 | 2.05683448 | 19.5422391 | 3.09E-05   | 0.00837446 |
| SNORD35B    | 1.98603044 | 2.23057928 | 14.9576553 | 0.00022182 | 0.03490981 |
| EIF2AK2     | 0.48207929 | 4.04014307 | 15.3905183 | 0.00017306 | 0.02965602 |
| ARHGEF33    | 2.02124005 | -0.8259545 | 14.3187859 | 0.00028557 | 0.04113921 |
| SSFA2       | 0.36107868 | 5.61417964 | 14.2565995 | 0.00028935 | 0.04131927 |
| FN1         | 4.9742134  | 6.05156465 | 25.0498677 | 3.30E-06   | 0.00273212 |
| SLC19A3     | 4.56658778 | -0.0986405 | 26.358092  | 1.92E-06   | 0.00217    |
| MLPH        | 4.05670436 | 0.70126476 | 23.7611874 | 5.41E-06   | 0.00284281 |
| SNORD57     | 3.48649108 | 0.96018224 | 17.1886986 | 8.38E-05   | 0.01842603 |
| LOC10192937 | 4.75167483 | -0.955513  | 23.4015001 | 6.21E-06   | 0.00297209 |
| EPB41L1     | 2.13409946 | 0.37169549 | 14.7231116 | 0.00024184 | 0.03698418 |
| TGM2        | 2.59762203 | 3.22945919 | 20.3645182 | 2.18E-05   | 0.00683524 |
| PPARG       | 3.26055925 | 1.80698941 | 19.5419832 | 3.08E-05   | 0.00837446 |
| FGD5        | 2.83568498 | 0.61604325 | 19.912298  | 2.57E-05   | 0.0076167  |
| STAC        | 3.5382405  | 0.8988528  | 23.8623959 | 5.17E-06   | 0.00284281 |
| VGLL3       | 2.00383682 | -1.1101987 | 13.9851547 | 0.00033195 | 0.04556625 |
| PCOLCE2     | 4.29192677 | 0.57763149 | 23.1656921 | 6.90E-06   | 0.00311803 |
| PLSCR1      | 0.54160823 | 4.89429892 | 17.8527167 | 5.81E-05   | 0.01412554 |
| MME         | 3.08929197 | 2.24808974 | 23.5680946 | 5.88E-06   | 0.00290238 |
| SCARNA22    | 5.13221565 | 0.53316123 | 23.8642599 | 5.24E-06   | 0.00284281 |
| SCARB2      | 0.43232145 | 5.46818146 | 16.6610052 | 9.82E-05   | 0.01997502 |
| ABCG2       | 2.00845294 | 0.31667491 | 16.3330518 | 0.0001165  | 0.02284935 |
| CPE         | 2.74101943 | -0.8690939 | 18.6416834 | 4.30E-05   | 0.01060517 |
| LOC731424   | 1.68301868 | -0.776041  | 18.6262177 | 4.15E-05   | 0.01052154 |

|             |            |            |            |            |            |
|-------------|------------|------------|------------|------------|------------|
| LINC00461   | 5.95460778 | 2.91475836 | 28.1750259 | 9.84E-07   | 0.00217    |
| MIR9-2      | 6.85820507 | 2.89915639 | 26.3840307 | 1.96E-06   | 0.00217    |
| PPIC        | 2.59916575 | -1.3195243 | 16.8205835 | 9.42E-05   | 0.01940601 |
| PDE6A       | -0.9411419 | -1.4870813 | 16.9550839 | 8.62E-05   | 0.01870981 |
| LINC01366   | 3.03045035 | -0.299587  | 17.5854763 | 6.93E-05   | 0.01618733 |
| CPEB4       | 0.49544332 | 4.68882063 | 13.956303  | 0.00033198 | 0.04556625 |
| SNORD95     | 4.62895509 | 3.08532361 | 25.0057964 | 3.36E-06   | 0.00273212 |
| SNORD48     | 2.80226979 | -0.644886  | 15.8828136 | 0.00014505 | 0.02594878 |
| TREM2       | 2.64800372 | -0.5026554 | 14.8970676 | 0.00022517 | 0.03490981 |
| MIR30C2     | 6.43257877 | 6.84657439 | 19.7749195 | 2.81E-05   | 0.0080152  |
| SNORD50B    | 2.37559599 | -0.0635355 | 16.9316146 | 9.04E-05   | 0.0189534  |
| LOC285740   | -1.1622933 | -1.3946247 | 14.3342863 | 0.00027927 | 0.04095754 |
| SNORA20     | 3.255814   | -0.5312308 | 19.3466273 | 3.26E-05   | 0.00869364 |
| PARK2       | 2.35458124 | 0.44165795 | 16.934751  | 9.08E-05   | 0.0189534  |
| GPNMB       | 4.29275688 | 3.6467169  | 26.4384009 | 1.92E-06   | 0.00217    |
| INHBA       | 2.44024735 | 0.21080984 | 14.4618433 | 0.00027474 | 0.04065871 |
| SND1-IT1    | -1.3475479 | -1.1813529 | 13.9490263 | 0.00033309 | 0.04556625 |
| RNY3        | 3.50202742 | 3.84634921 | 16.0951261 | 0.0001356  | 0.02452702 |
| RNY1        | 5.24602216 | 4.09951559 | 24.50426   | 4.09E-06   | 0.00284281 |
| DPP6        | 3.47045396 | 0.16808964 | 22.305132  | 9.61E-06   | 0.00372488 |
| MSR1        | 2.00625524 | 4.0376114  | 20.8493123 | 1.78E-05   | 0.00603809 |
| SFRP1       | 2.14327579 | -1.4579149 | 16.2042406 | 0.00012173 | 0.02331363 |
| LOC10028784 | 4.47951767 | 0.14970278 | 22.1700955 | 1.03E-05   | 0.0038171  |
| FABP4       | 5.95102578 | 2.15098324 | 26.8992858 | 1.60E-06   | 0.00217    |
| PLEKHF2     | 0.41813675 | 4.21027276 | 16.1939851 | 0.00012079 | 0.02331363 |
| KLF10       | 0.64769117 | 5.98169015 | 14.8810634 | 0.00022033 | 0.03490981 |
| DCSTAMP     | 2.73253482 | -1.3426129 | 16.4177682 | 0.0001133  | 0.02249263 |
| MIR30B      | 4.30823555 | -0.3707127 | 24.0960583 | 4.69E-06   | 0.00284281 |
| FRMPD1      | 2.71291898 | -0.8651886 | 21.871907  | 1.09E-05   | 0.00384105 |
| NR4A3       | 1.73837015 | 0.20787305 | 15.650106  | 0.00015596 | 0.02759577 |
| MEGF9       | 0.35783869 | 6.77739786 | 13.9242577 | 0.0003369  | 0.04570283 |
| RAB14       | 0.25910675 | 5.78210174 | 13.9579629 | 0.00033173 | 0.04556625 |
| RNF224      | 2.59127364 | 0.82636105 | 14.4131604 | 0.00028312 | 0.04113921 |
| ANOS1       | 2.26680517 | -0.003045  | 14.7129899 | 0.00024309 | 0.03698418 |
| CYBB        | 0.40760941 | 9.03421465 | 16.1004174 | 0.00012593 | 0.02343452 |
| MAOA        | 2.64983143 | 0.22678808 | 16.5143484 | 0.00011036 | 0.02217865 |
| VSIG4       | 2.07640964 | 3.66012607 | 15.745781  | 0.00015766 | 0.02759796 |
| LAMP2       | 0.37461538 | 6.35033416 | 19.9382776 | 2.37E-05   | 0.00713167 |
