# Supplementary material
Source: HighWire-hosted journal article supplement (https://thorax.bmj.com/content/76/2/134)
Supplement: inline-supplementary-material-21 [file inline-supplementary-material-21.pdf]

**Supplementary Table 16: List of enriched pathways for 125 differentially expressed genes in PBMC for cluster 2 and cluster 3**

| Function                                                | FDR         | Genes in network | Genes in genome |
|---------------------------------------------------------|-------------|------------------|-----------------|
| cholesterol transport                                   | 2.00E-06    | 6                | 96              |
| sterol transport                                        | 2.00E-06    | 6                | 106             |
| lipid transport                                         | 1.38E-05    | 15               | 368             |
| inflammatory response                                   | 6.85E-05    | 13               | 684             |
| organic hydroxy compound transport                      | 0.00012112  | 9                | 256             |
| triglyceride metabolic process                          | 0.000323099 | 6                | 104             |
| lipid localization                                      | 0.000333566 | 15               | 402             |
| regulation of lipid transport                           | 0.000530311 | 8                | 121             |
| plasma lipoprotein particle                             | 0.003983562 | 4                | 39              |
| protein-lipid complex                                   | 0.003983562 | 4                | 41              |
| blood microparticle                                     | 0.010243507 | 6                | 143             |
| heparin binding                                         | 0.010243507 | 8                | 161             |
| negative regulation of multicellular organismal process | 0.011814552 | 19               | 1261            |
| very-low-density lipoprotein particle                   | 0.019783759 | 3                | 20              |
| glycosaminoglycan binding                               | 0.027839593 | 9                | 226             |
| sulfur compound binding                                 | 0.027839593 | 8                | 238             |
| regulation of fatty acid metabolic process              | 0.03340859  | 6                | 85              |
| negative regulation of lipid transport                  | 0.042806693 | 5                | 44              |
