# Supplementary material
Source: HighWire-hosted journal article supplement (https://thorax.bmj.com/content/76/2/134)

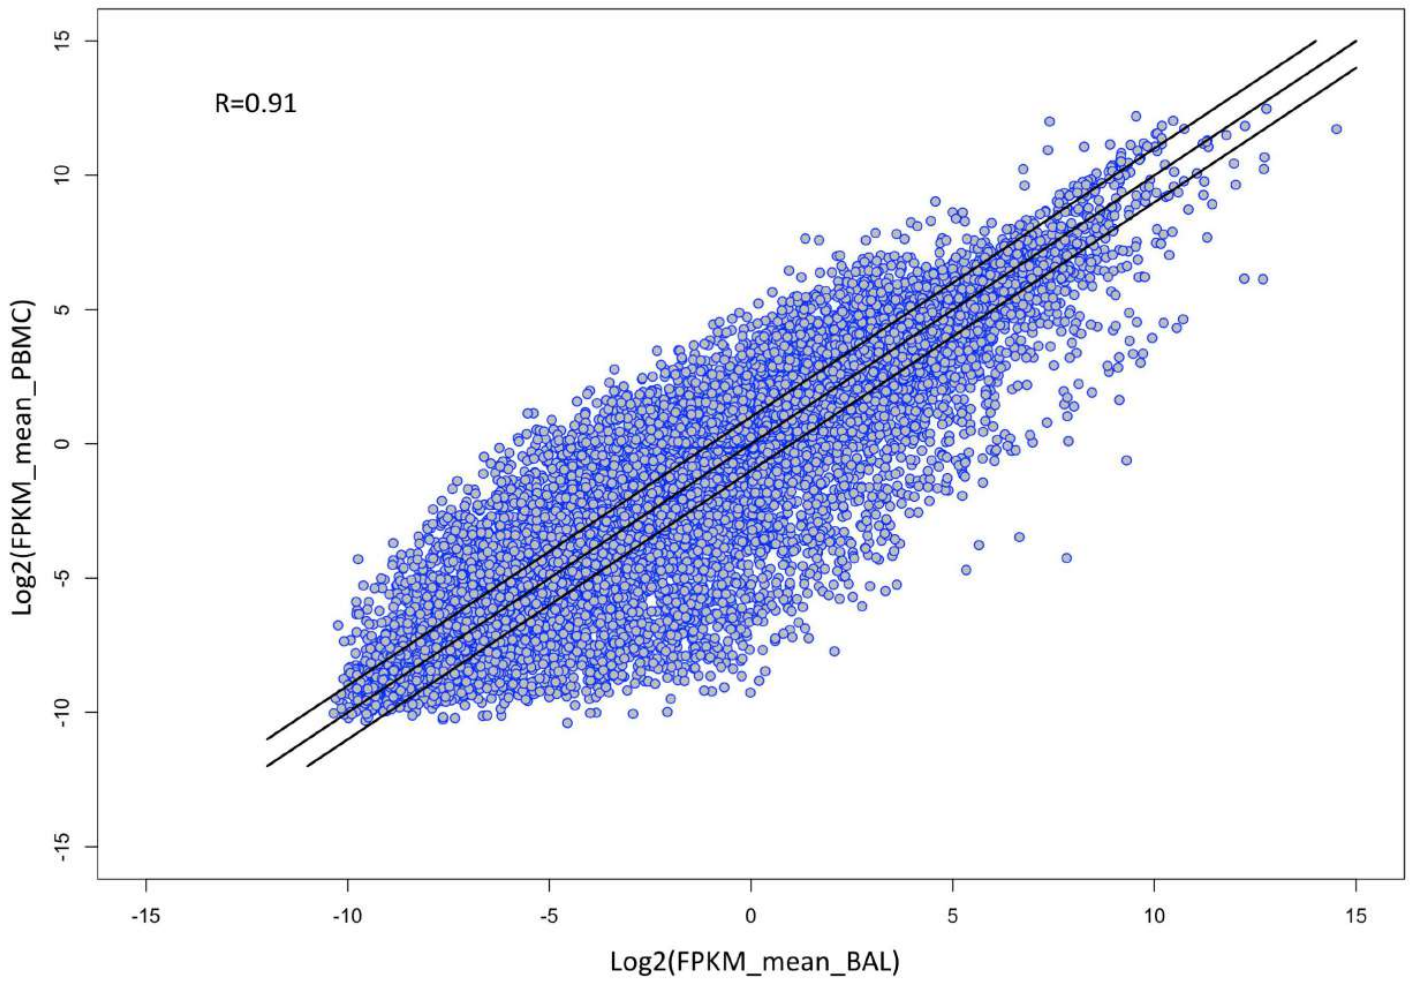

Supplement: inline-supplementary-material-12 [file inline-supplementary-material-12.pdf]

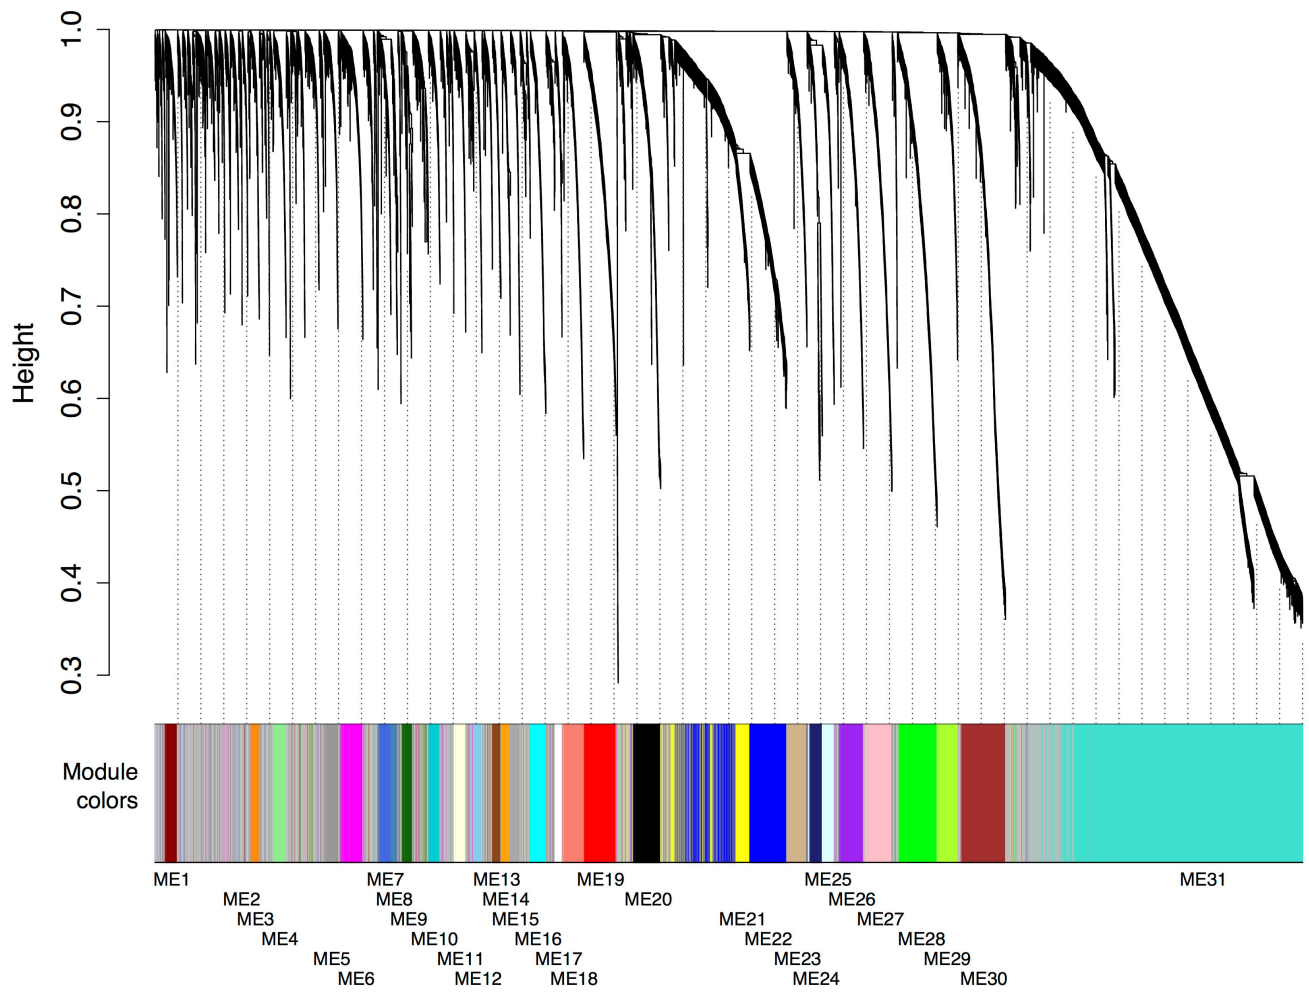

Supplement: inline-supplementary-material-15 [file inline-supplementary-material-15.pdf]

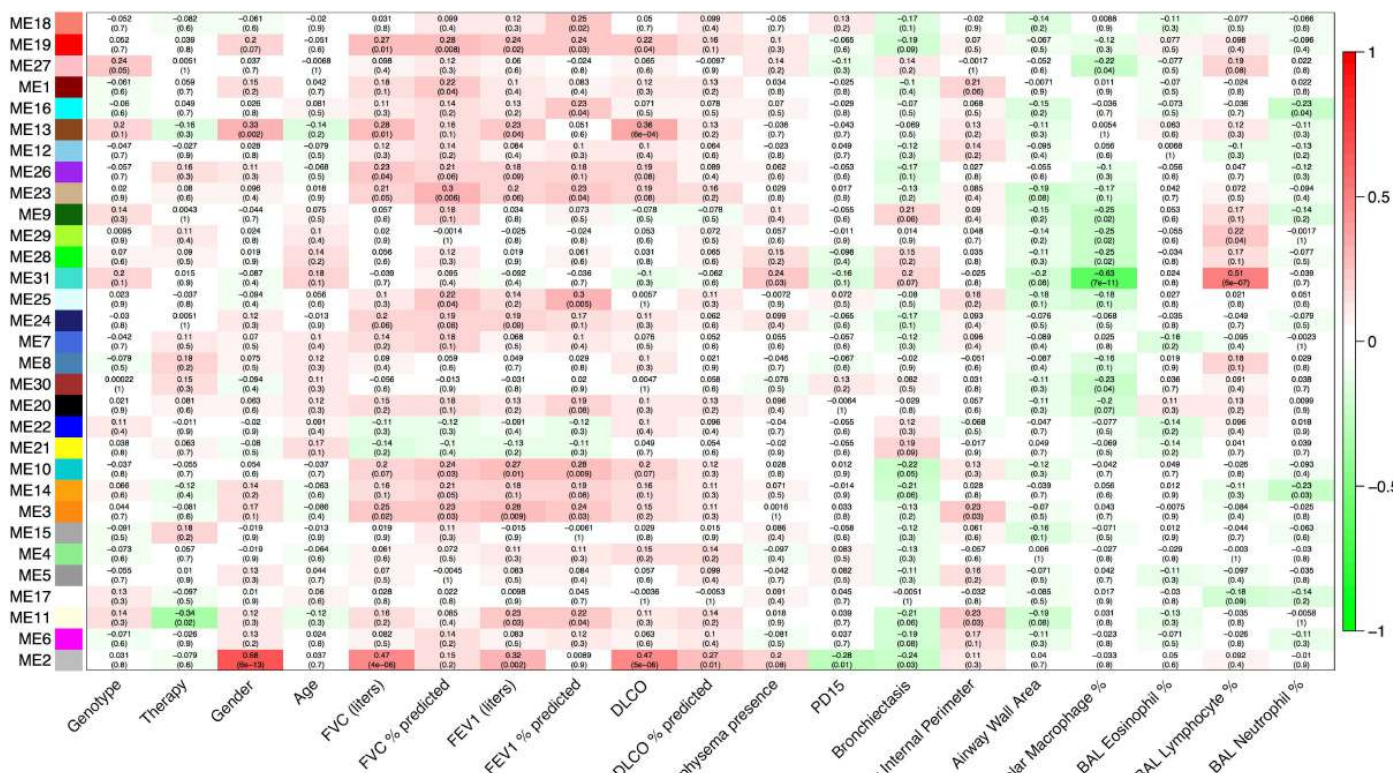

Supplement: inline-supplementary-material-16 [file inline-supplementary-material-16.pdf]

a) Genotype Effect (PiZZ off vs PiMZ) Gene Sets

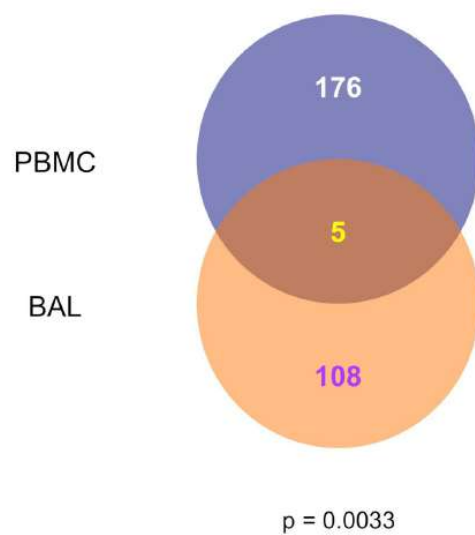

b) Therapy Effect (PiZZ on vs PiZZ off) Gene Sets

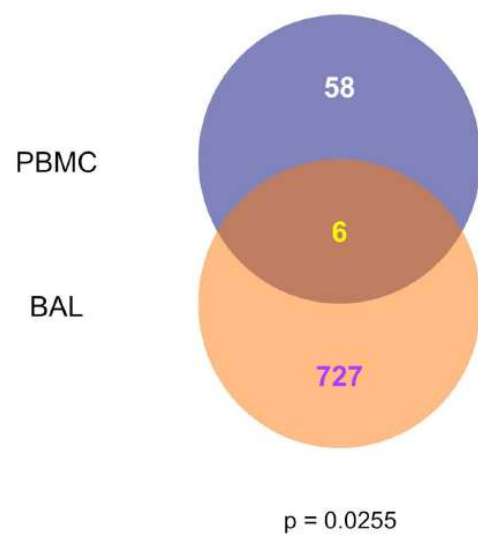

Supplement: inline-supplementary-material-4 [file inline-supplementary-material-4.pdf]
